# Supplementary material for: Insights into the effects of substitution position on the photophysics of mono-o-carborane-substituted pyrenes
Source: Royal Society of Chemistry journal article supplement (doi:10.1039/d0qi00563k), 2020-01-01
Supplement: d0qi00563k1.pdf [file d0qi00563k1.pdf]

## Electronic Supplementary Information

### Insights into the Effects of Substitution Position on the Photophysics of Mono-*o*-Carborane-Substituted Pyrenes

Seonah Kim,<sup>a‡</sup>, Ji Hye Lee,<sup>a‡</sup> Hyunhee So,<sup>a‡</sup> Mingi Kim,<sup>a</sup> Min Sik Mun,<sup>a</sup> Hyonseok Hwang,<sup>a</sup> Myung Hwan Park,<sup>\*b</sup> and Kang Mun Lee<sup>\*a</sup>

<sup>a</sup> Department of Chemistry, Institute for Molecular Science and Fusion Technology, Kangwon National University, Chuncheon, Gangwon 24341, Republic of Korea

<sup>b</sup> Department of Chemistry Education, Chungbuk National University, Cheongju, Chungbuk 28644, Republic of Korea

#### Contents

|                                                                                 |         |
|---------------------------------------------------------------------------------|---------|
| NMR and HRMS Spectra for the <i>o</i> -carborane compounds and their precursors | S2–S12  |
| Crystallographic data and parameters for the <i>o</i> -carborane compounds      | S13     |
| Selected bond lengths (Å) and angles (°) for the <i>o</i> -carborane compounds  | S14     |
| Theoretical calculation results for the <i>o</i> -carborane compounds           | S15–S23 |
| Excitation graphs in THF solution for <i>o</i> -carborane compounds             | S24     |
| PL spectra of <i>o</i> -carborane compounds in various organic solvents         | S24     |
| PL spectra of <i>o</i> -carborane compounds in THF/distilled water mixtures     | S24     |
| Emission decay curves for <i>o</i> -carborane compounds                         | S25     |
| Cartesian coordinates of <b>1CB</b>                                             | S26–S36 |
| Cartesian coordinates of <b>2CB</b>                                             | S37–S43 |
| Cartesian coordinates of <b>4CB</b>                                             | S44–S54 |

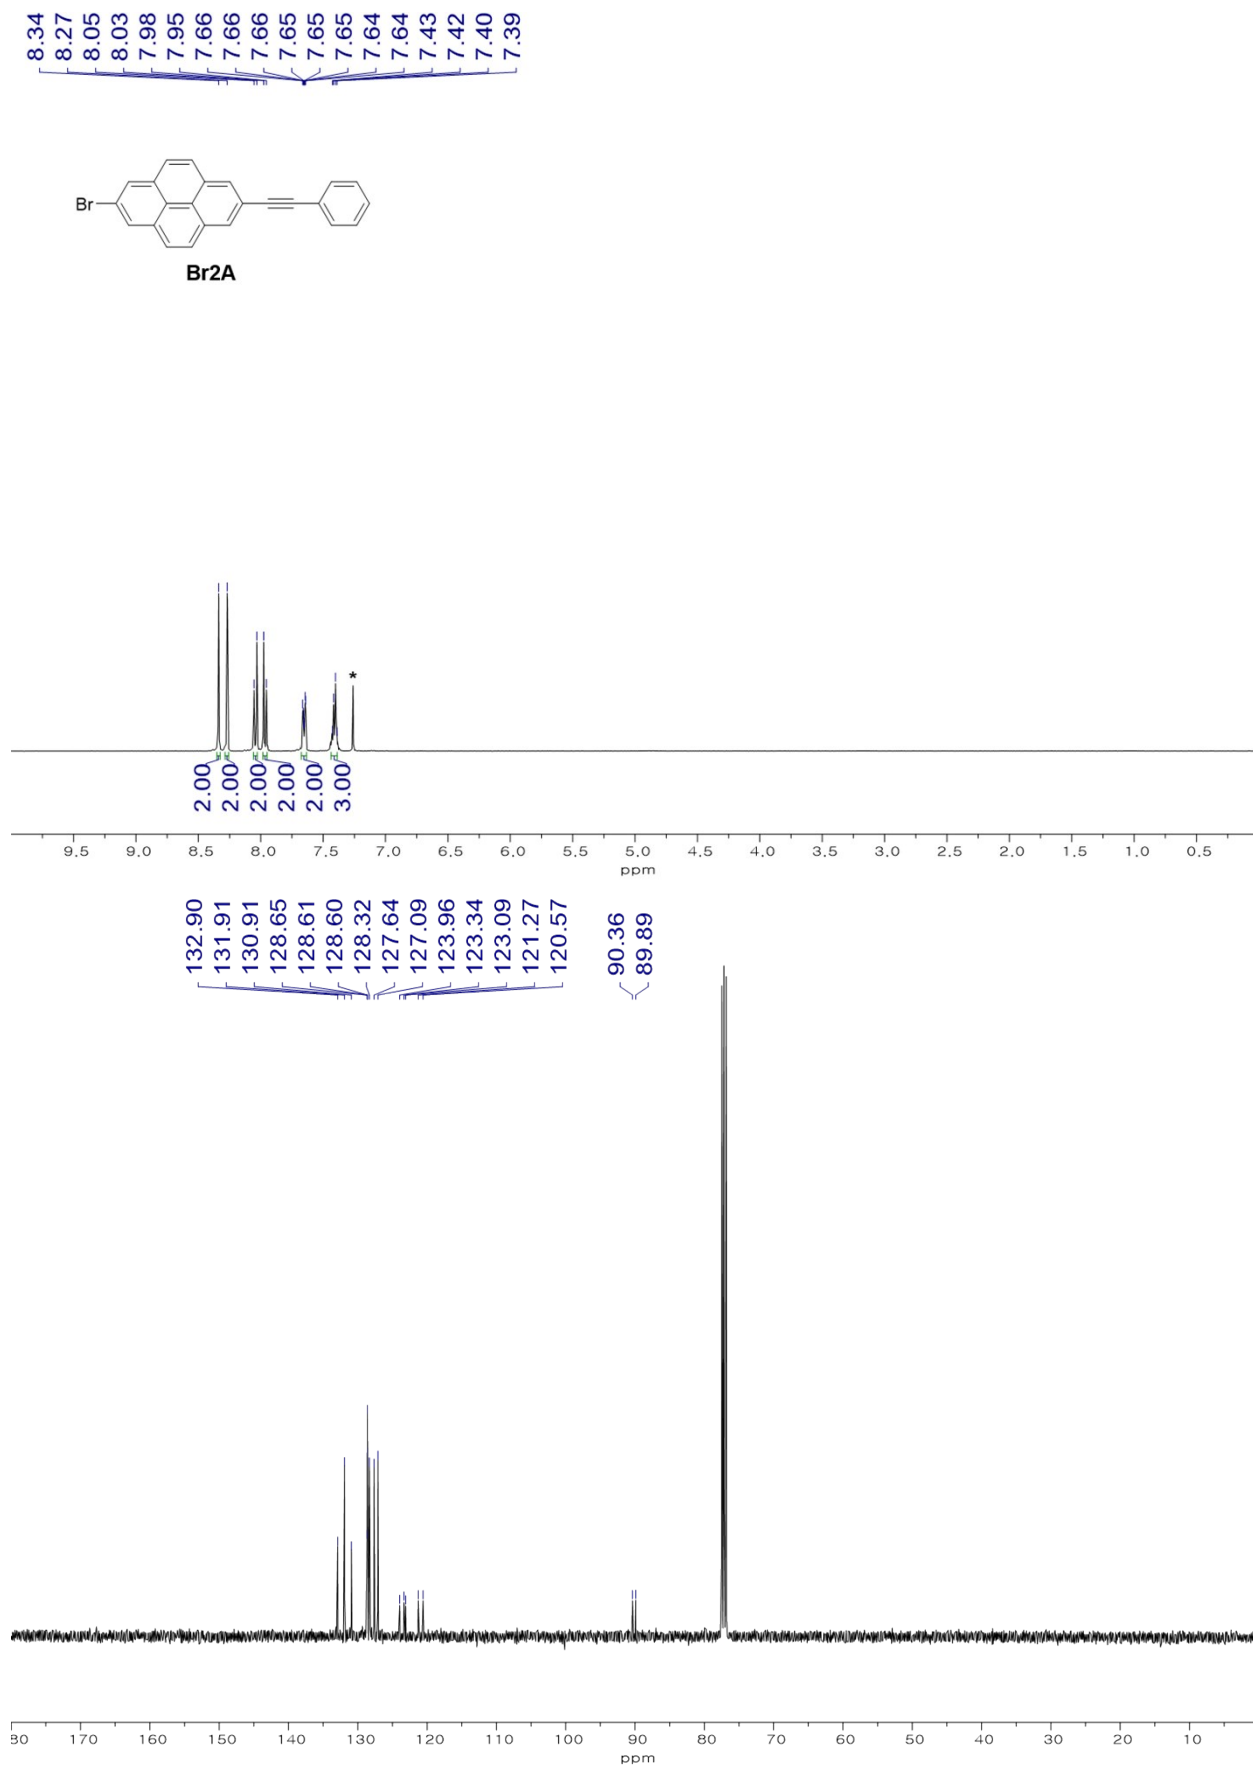

**Fig. S1** <sup>1</sup>H (top) and <sup>13</sup>C (bottom) NMR spectra of **Br2A** in CDCl<sub>3</sub> (\* from residual CHCl<sub>3</sub> in CDCl<sub>3</sub>).

[ Mass Spectrum ]

RT : 0.96 min Scan# : 26

Elements : C 24/0, H 49/0, 79Br 1/0, 81Br 1/0

Mass Tolerance : 1000ppm, 5mmu if m/z < 5, 10mmu if m/z > 10

Unsaturation (U.S.) : -0.5 - 20.0

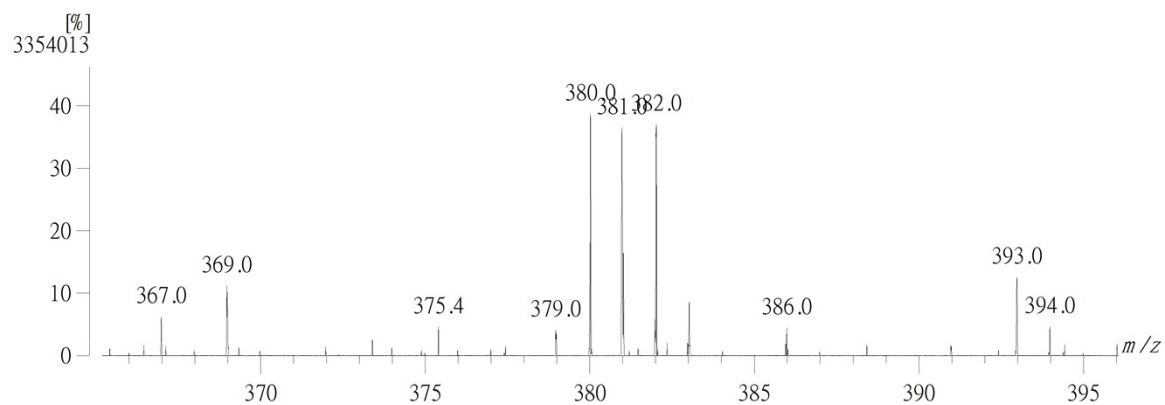

|   | Observed m/z | Int%  | Err [ppm / mmu] | U.S. | Composition  |
|---|--------------|-------|-----------------|------|--------------|
| 1 | 380.0202     | 38.73 | +0.4 / +0.1     | 18.0 | C24 H13 79Br |
| 2 | 382.0219     | 37.06 | +10.2 / +3.9    | 18.0 | C24 H13 81Br |

**Fig. S2** HRMS spectra of **Br2A**.

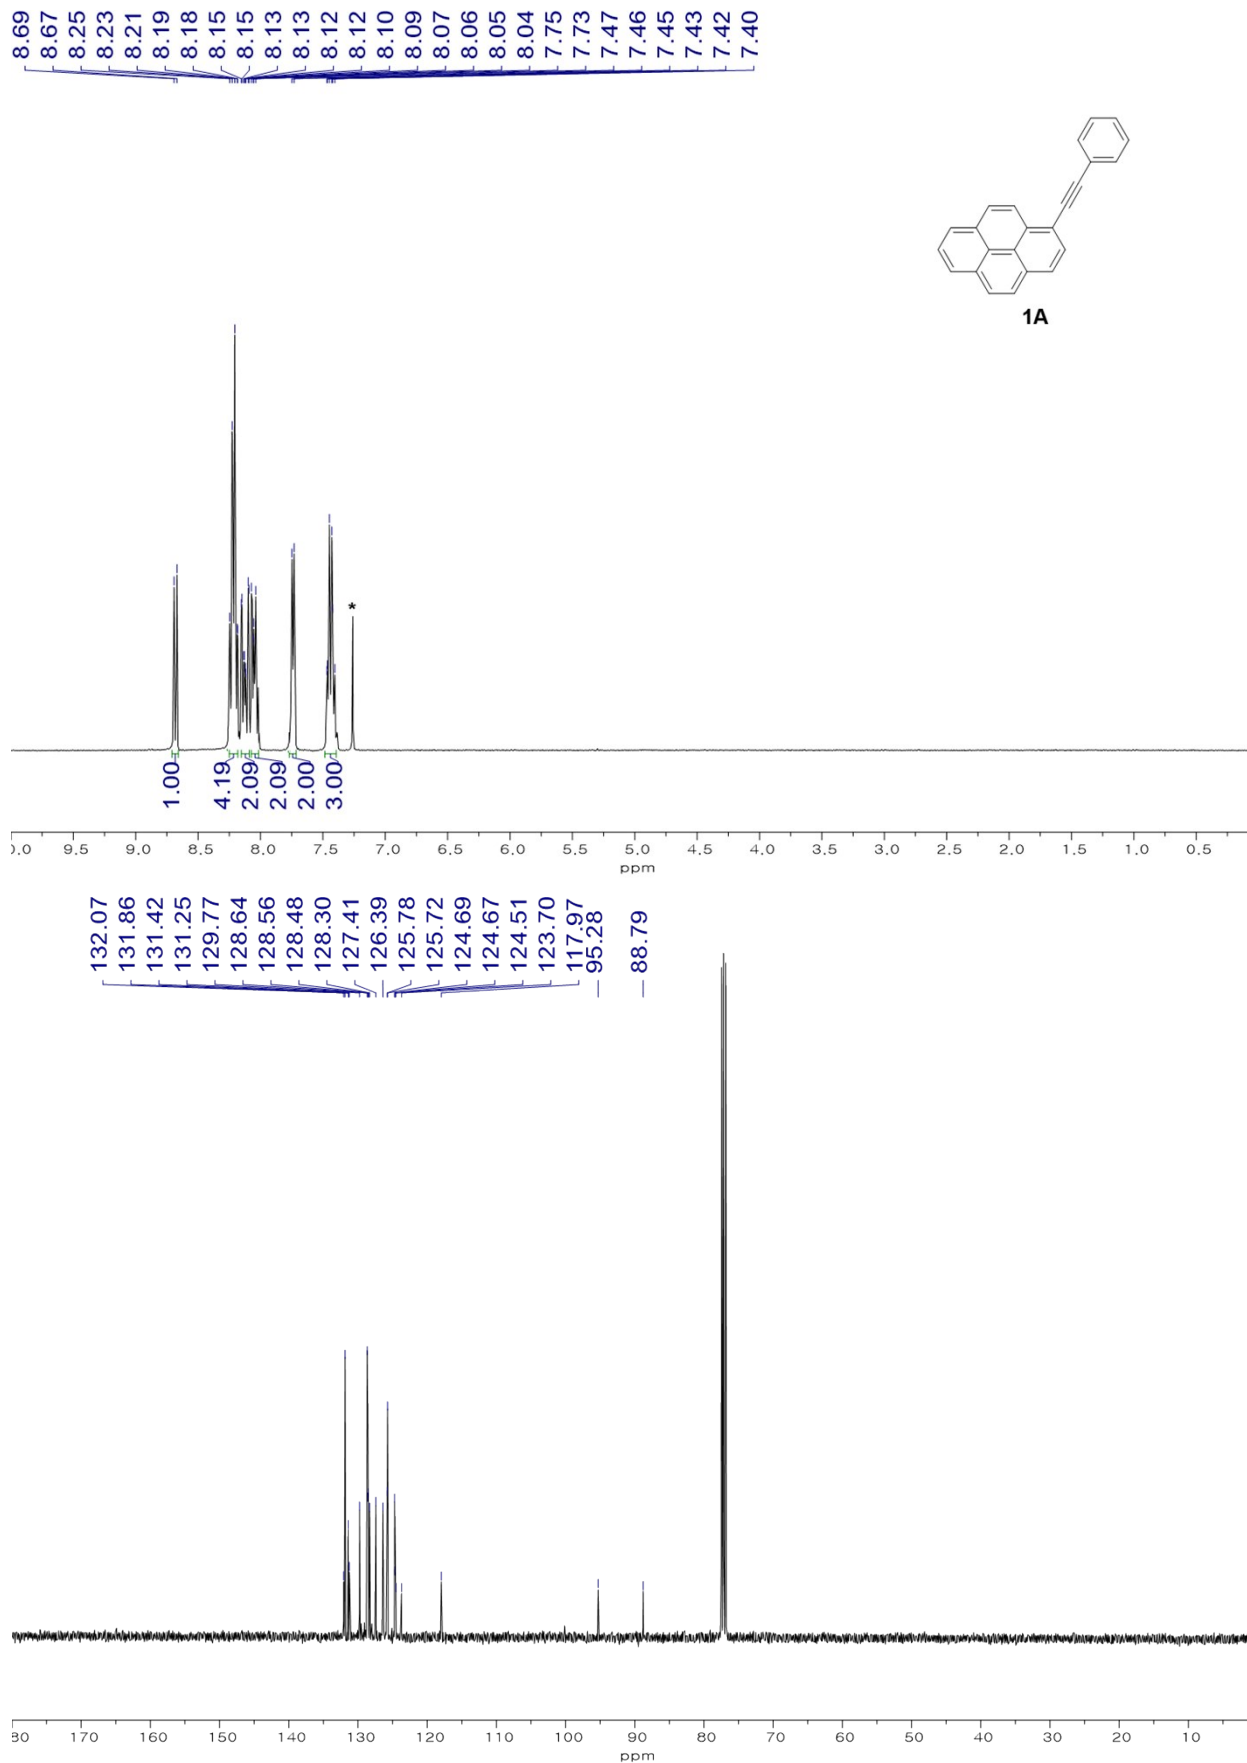

**Fig. S3** <sup>1</sup>H (top) and <sup>13</sup>C (bottom) NMR spectra of **1A** in CDCl<sub>3</sub> (\* from residual CHCl<sub>3</sub> in CDCl<sub>3</sub>).

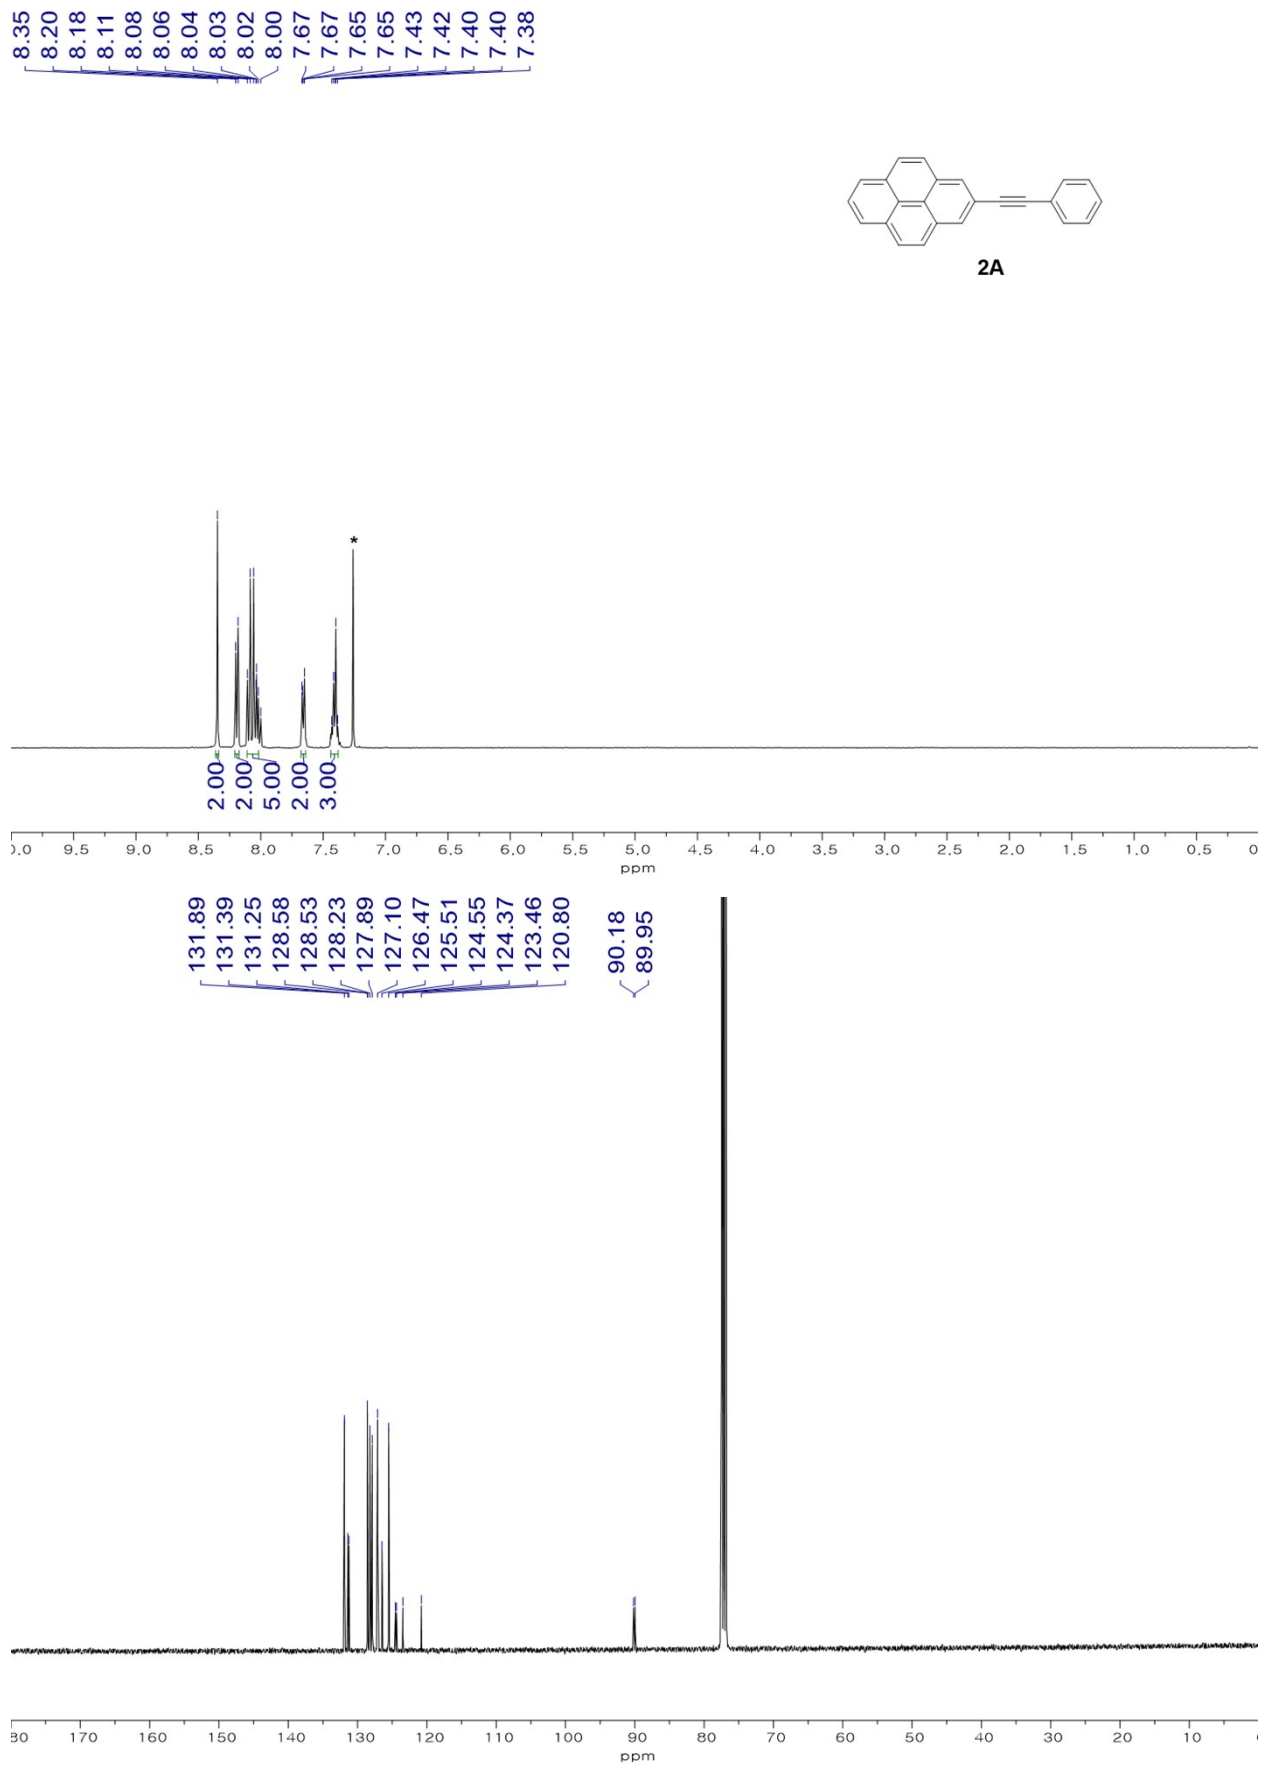

**Fig. S4** <sup>1</sup>H (top) and <sup>13</sup>C (bottom) NMR spectra of **2A** in CDCl<sub>3</sub> (\* from residual CHCl<sub>3</sub> in CDCl<sub>3</sub>).

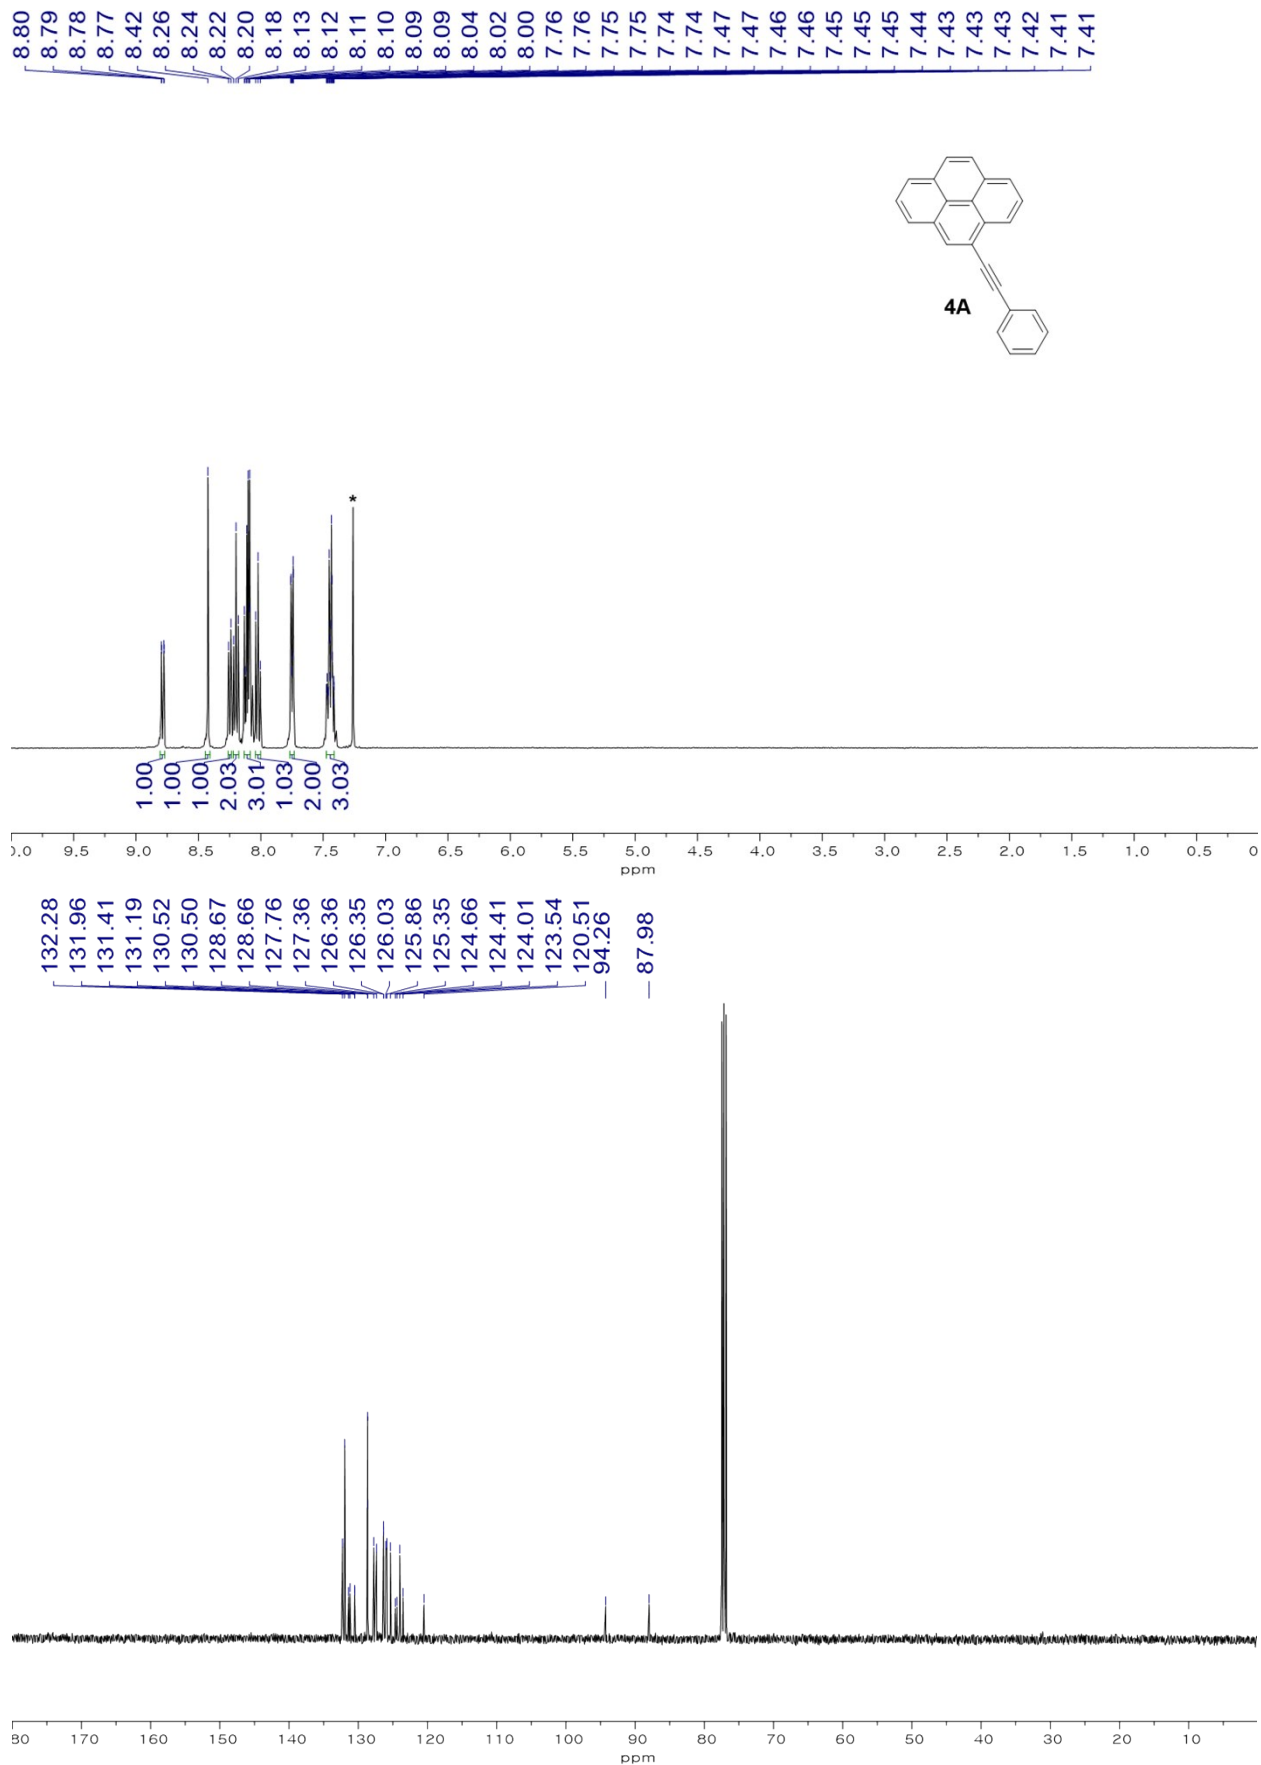

**Fig. S5** <sup>1</sup>H (top) and <sup>13</sup>C (bottom) NMR spectra of **4A** in CDCl<sub>3</sub> (\* from residual CHCl<sub>3</sub> in CDCl<sub>3</sub>).

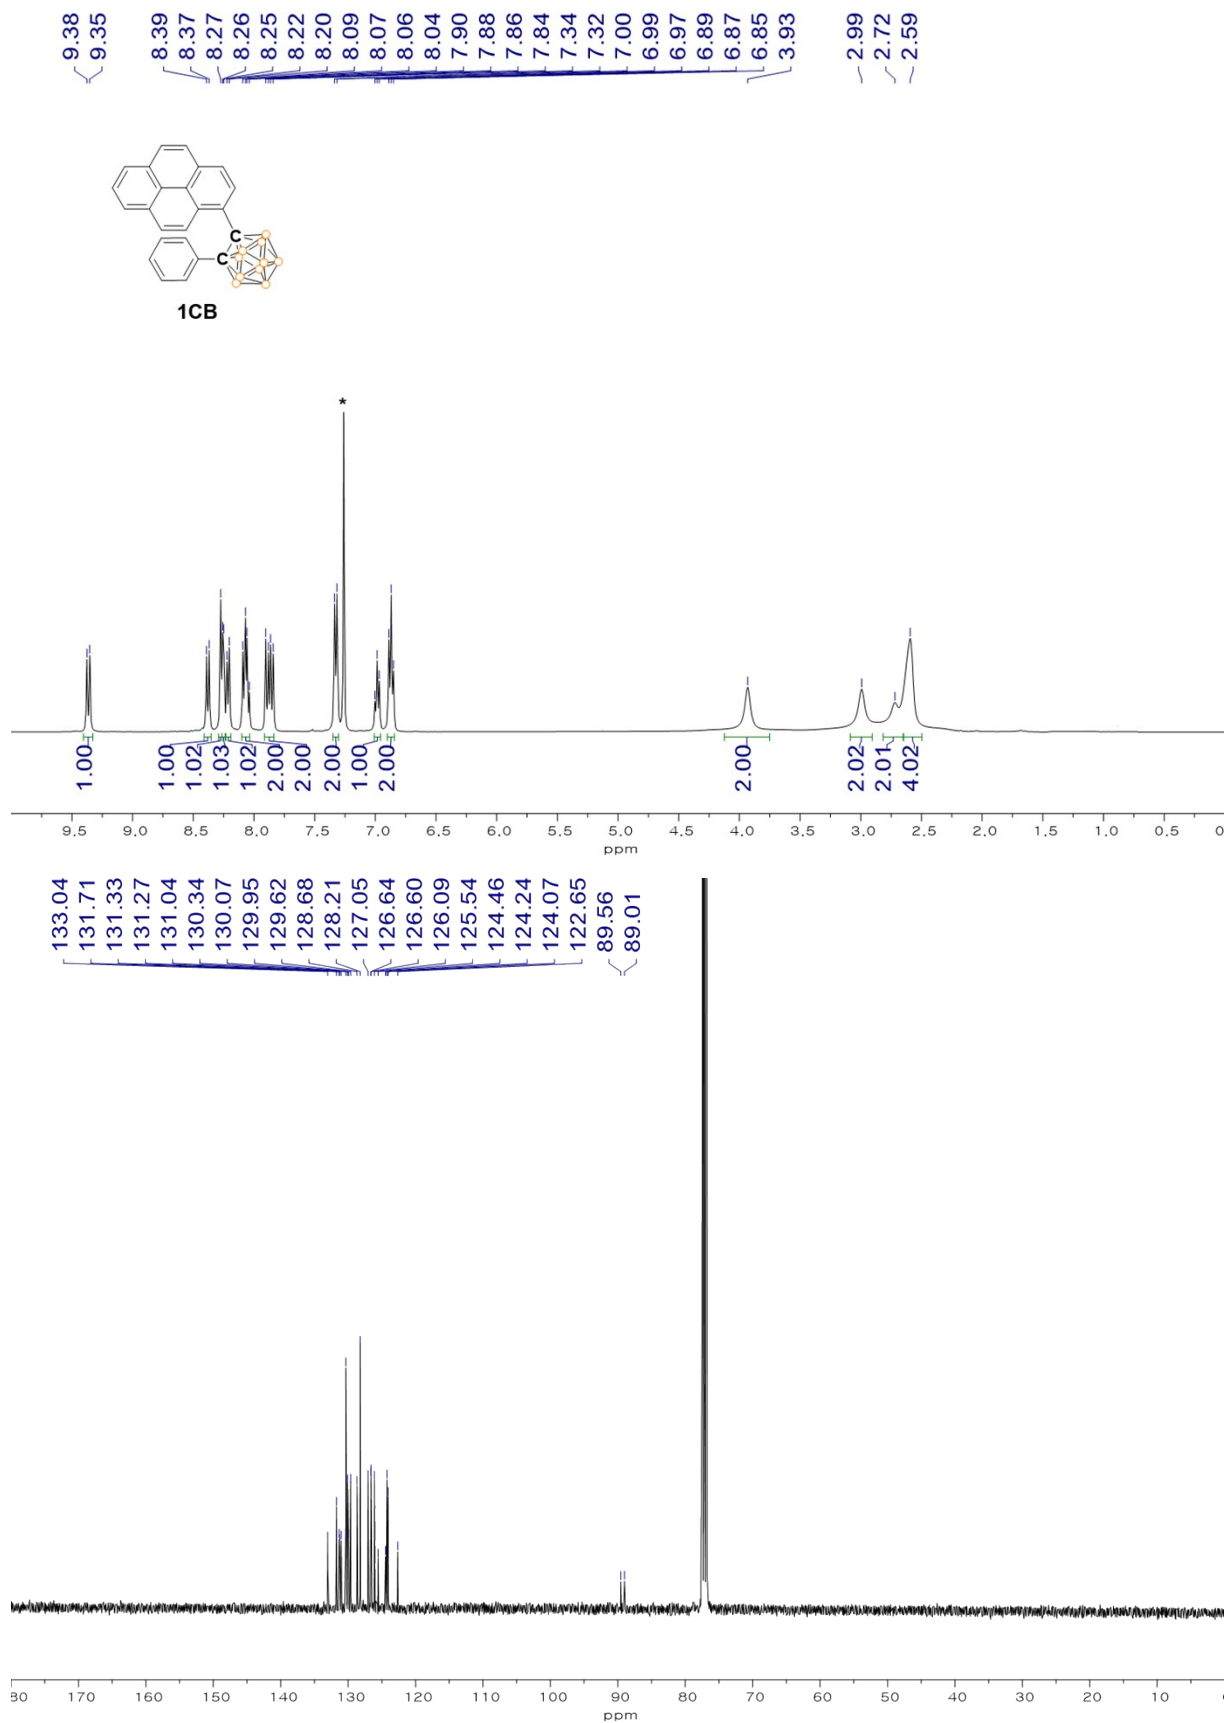

**Fig. S6**  $^1\text{H}\{^{11}\text{B}\}$  (top) and  $^{13}\text{C}$  (bottom) NMR spectra of **1CB** in  $\text{CDCl}_3$  (\* from residual  $\text{CHCl}_3$  in  $\text{CDCl}_3$ ).

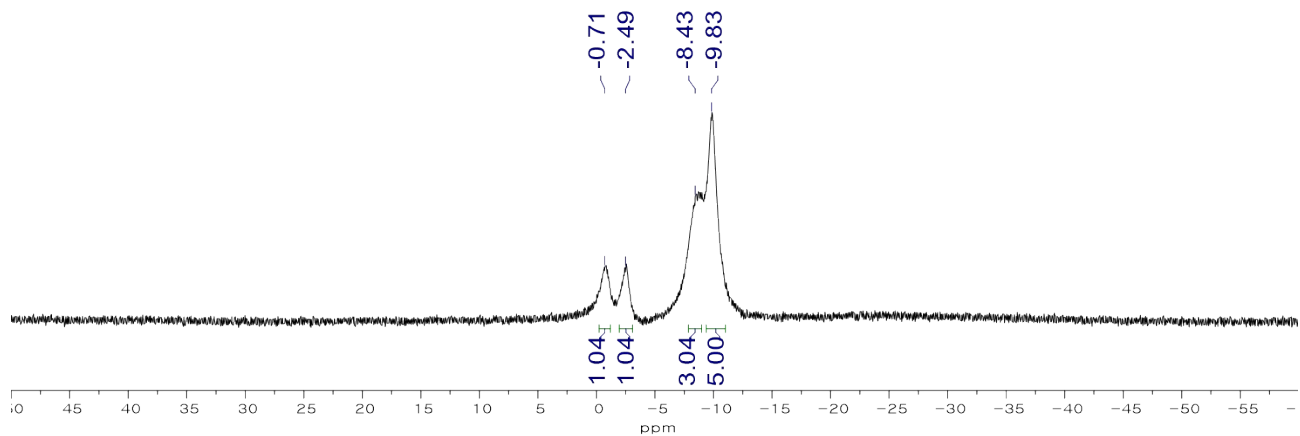

**Fig. S7**  $^{11}\text{B}\{^1\text{H}\}$  NMR spectra of **1CB** in  $\text{CDCl}_3$ .



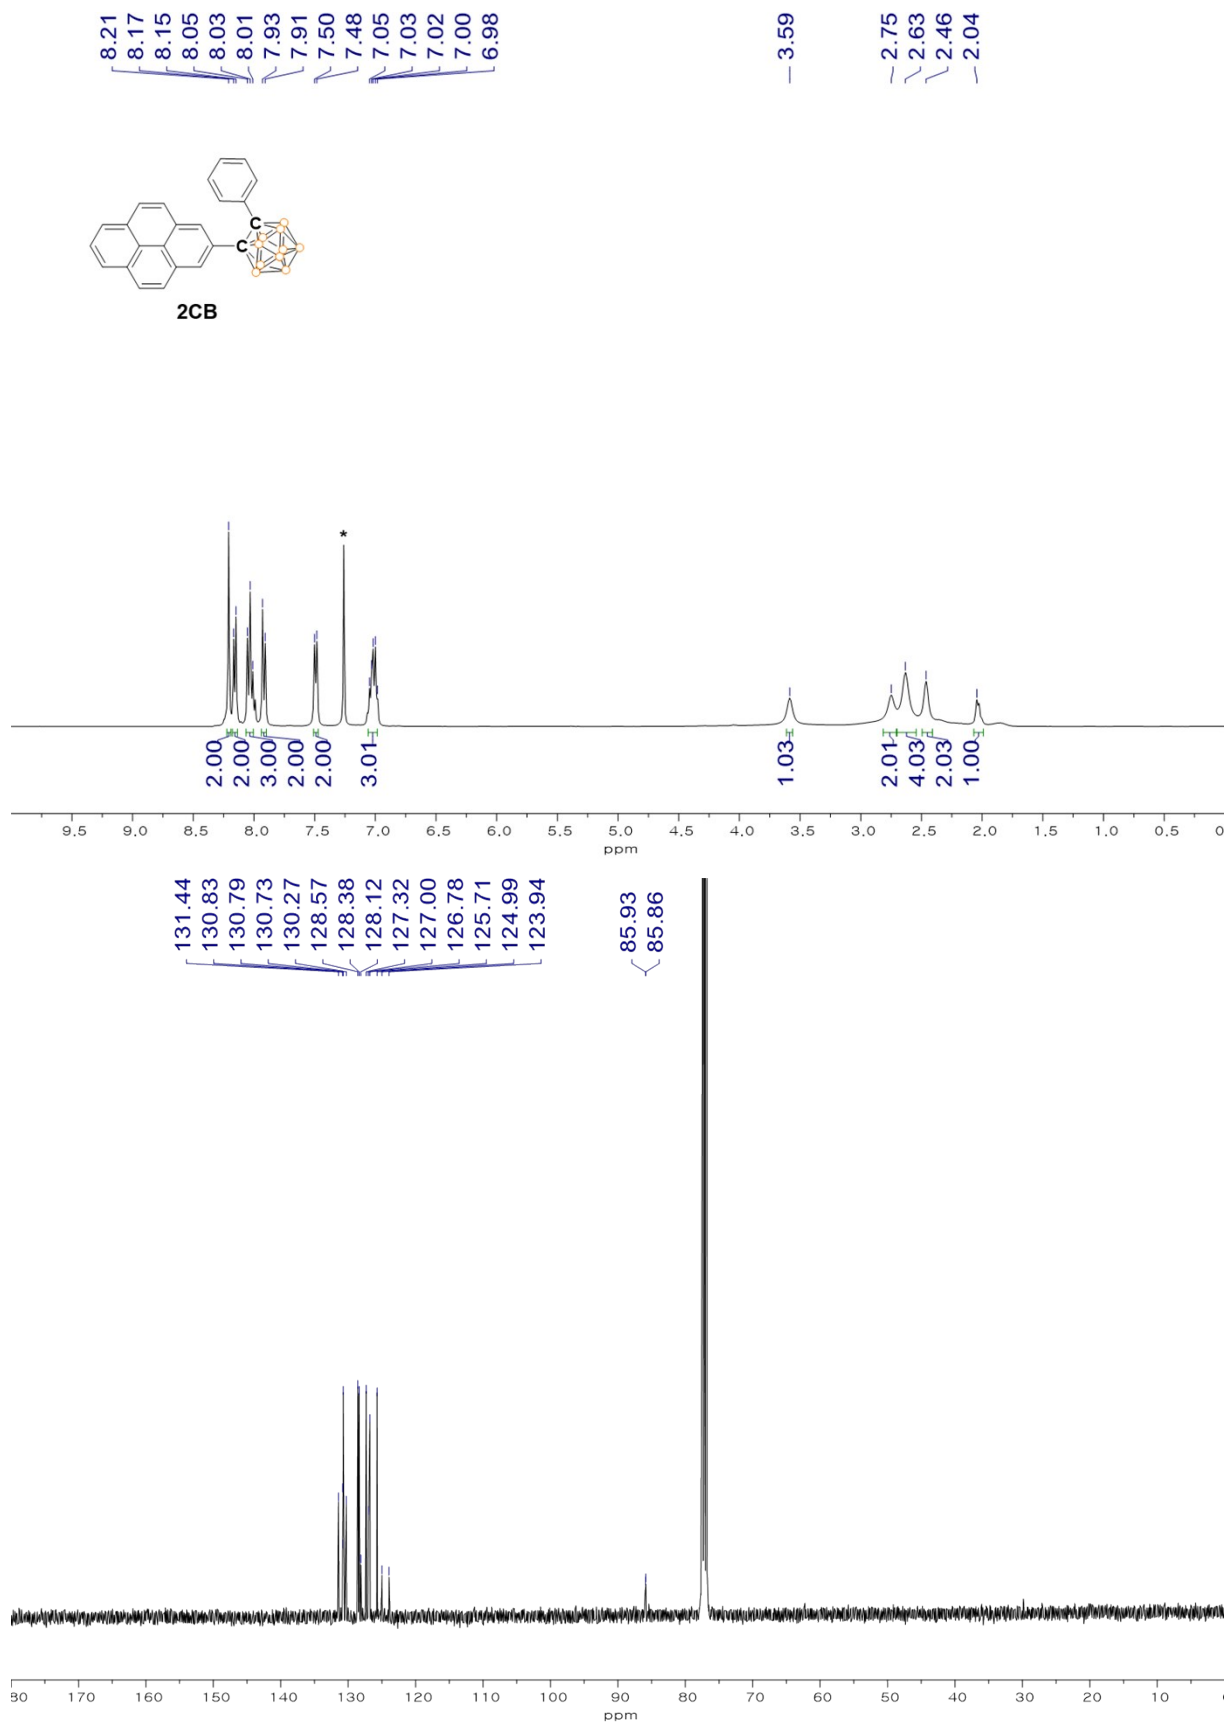

**Fig. S8**  $^1\text{H}\{^{11}\text{B}\}$  (top) and  $^{13}\text{C}$  (bottom) NMR spectra of **2CB** in  $\text{CDCl}_3$  (\* from residual  $\text{CHCl}_3$  in  $\text{CDCl}_3$ ).

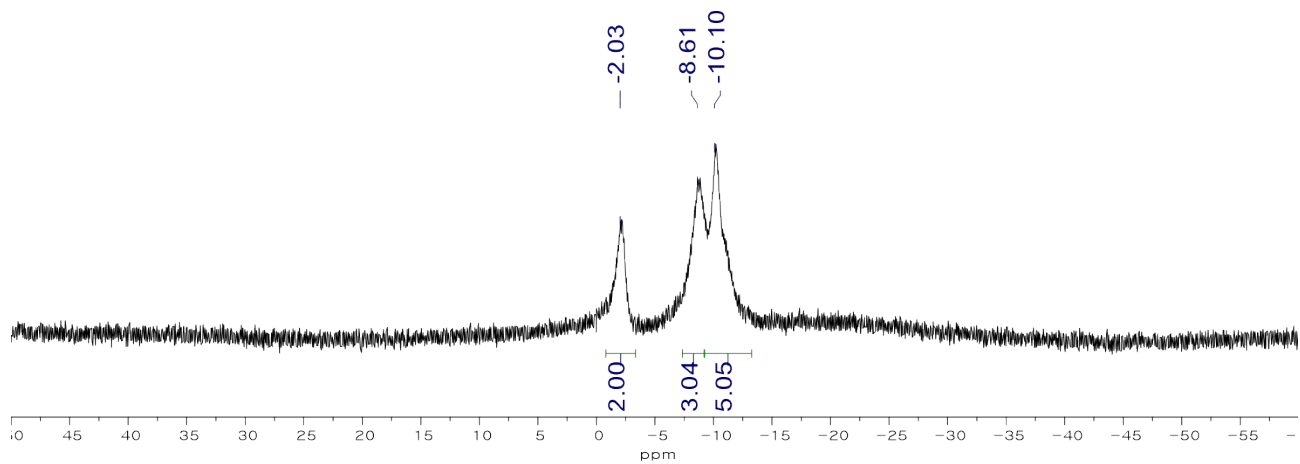

**Fig. S9**  $^{11}\text{B}\{^1\text{H}\}$  NMR spectra of **2CB** in  $\text{CDCl}_3$ .

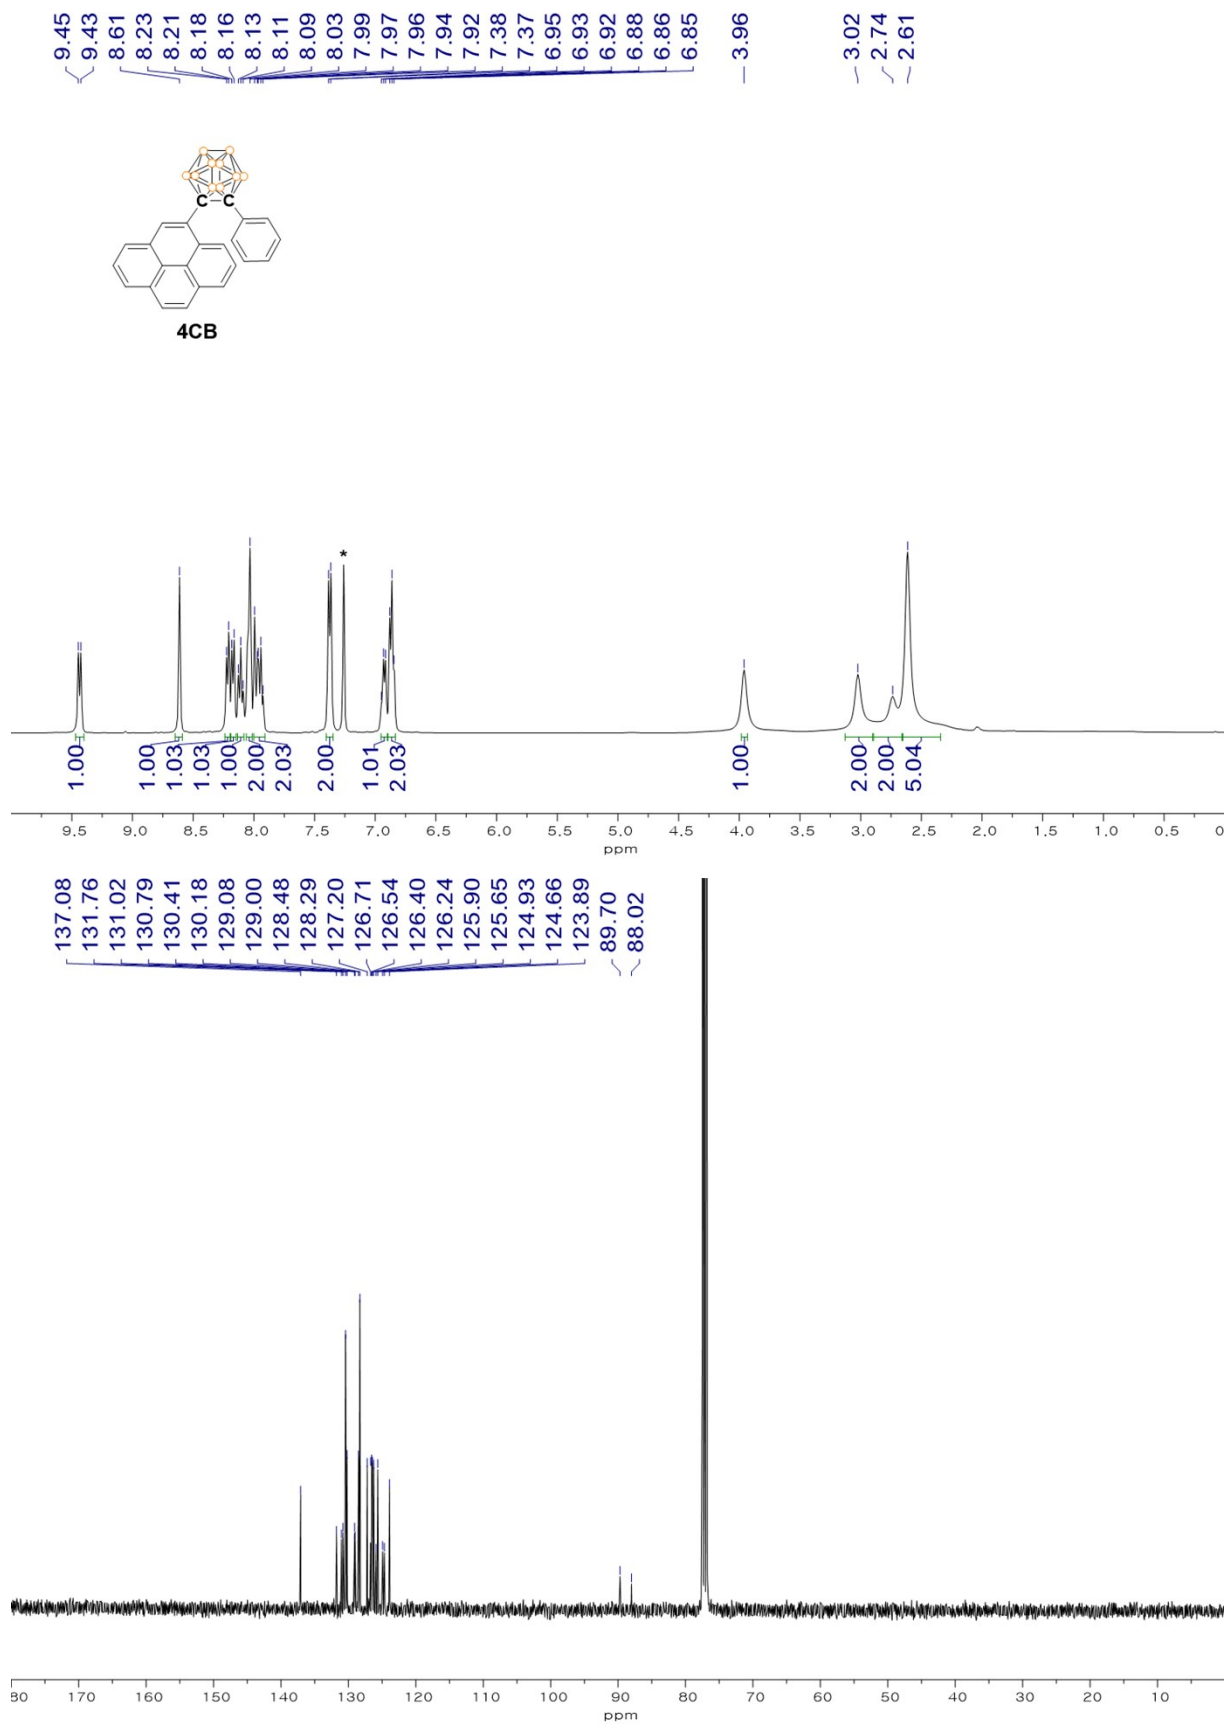

**Fig. S10**  $^1\text{H}\{^{11}\text{B}\}$  (top) and  $^{13}\text{C}$  (bottom) NMR spectra of **4CB** in  $\text{CDCl}_3$  (\* from residual  $\text{CHCl}_3$  in  $\text{CDCl}_3$ ).

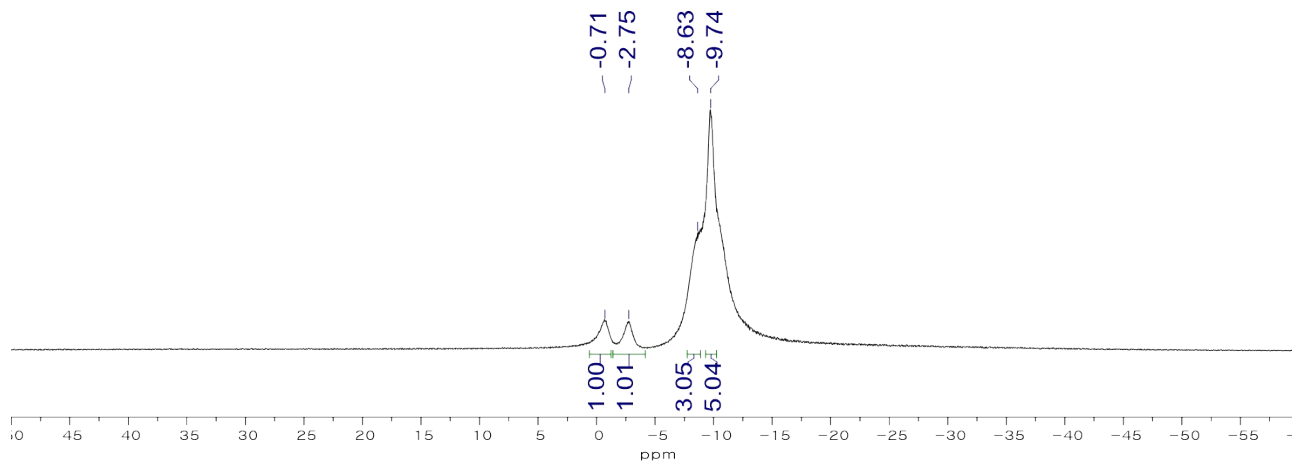

**Fig. S11**  $^{11}\text{B}\{^1\text{H}\}$  NMR spectra of **4CB** in  $\text{CDCl}_3$ .

**Table S1** Crystallographic data and parameters for the pyrene based *o*-carboranyl complexes **1CB**, **2CB** and **4CB**.

| Compound                                                          | <b>1CB</b>                                                          | <b>2CB</b>                                                          | <b>4CB</b>                                                          |
|-------------------------------------------------------------------|---------------------------------------------------------------------|---------------------------------------------------------------------|---------------------------------------------------------------------|
| Formula                                                           | C <sub>24</sub> H <sub>24</sub> B <sub>10</sub>                     | C <sub>24</sub> H <sub>24</sub> B <sub>10</sub>                     | C <sub>24</sub> H <sub>24</sub> B <sub>10</sub>                     |
| Formula weight                                                    | 420.53                                                              | 420.53                                                              | 420.53                                                              |
| Crystal system                                                    | Triclinic                                                           | Triclinic                                                           | Monoclinic                                                          |
| Space group                                                       | P <sub>1</sub>                                                      | P <sub>-1</sub>                                                     | P2 <sub>1</sub> /n                                                  |
| <i>a</i> (Å)                                                      | 12.839(3)                                                           | 10.7108(7)                                                          | 16.2276(9)                                                          |
| <i>b</i> (Å)                                                      | 13.981(3)                                                           | 25.1022(16)                                                         | 12.7661(7)                                                          |
| <i>c</i> (Å)                                                      | 13.619(3)                                                           | 25.7908(17)                                                         | 21.7252(13)                                                         |
| <i>α</i> (°)                                                      | 90.00(3)                                                            | 89.113(2)                                                           | 90                                                                  |
| <i>β</i> (°)                                                      | 114.47(3)                                                           | 88.861(2)                                                           | 90.3316(19)                                                         |
| <i>γ</i> (°)                                                      | 90.00(3)                                                            | 89.861(2)                                                           | 90                                                                  |
| <i>V</i> (Å <sup>3</sup> )                                        | 2225.1(9)                                                           | 6932.0(8)                                                           | 4500.6(4)                                                           |
| <i>Z</i>                                                          | 4                                                                   | 12                                                                  | 8                                                                   |
| $\rho_{\text{calc}}$ (g cm <sup>-3</sup> )                        | 1.255                                                               | 1.209                                                               | 1.241                                                               |
| $\mu$ (mm <sup>-1</sup> )                                         | 0.064                                                               | 0.062                                                               | 0.063                                                               |
| <i>F</i> (000)                                                    | 872                                                                 | 2616                                                                | 1744                                                                |
| <i>T</i> (K)                                                      | 293(2)                                                              | 153(2)                                                              | 153(2)                                                              |
| Scan mode                                                         | <i>multi-scan</i>                                                   | <i>multi-scan</i>                                                   | <i>multi-scan</i>                                                   |
| <i>hkl</i> range                                                  | -16 < <i>h</i> < 16,<br>-18 < <i>k</i> < 17,<br>-17 < <i>l</i> < 17 | -13 < <i>h</i> < 13,<br>-31 < <i>k</i> < 31,<br>-32 < <i>l</i> < 32 | -20 < <i>h</i> < 19,<br>-16 < <i>k</i> < 16,<br>-27 < <i>l</i> < 27 |
| Measd reflns                                                      | 22702                                                               | 246745                                                              | 64075                                                               |
| Unique reflns [ <i>R</i> <sub>int</sub> ]                         | 16955 [0.0856]                                                      | 28543 [0.0978]                                                      | 9745 [0.1287]                                                       |
| Reflns used for refinement                                        | 16955                                                               | 28543                                                               | 9745                                                                |
| Refined parameters                                                | 1225                                                                | 1838                                                                | 674                                                                 |
| <i>R</i> <sub>1</sub> <sup>[a]</sup> ( <i>I</i> > 2σ( <i>I</i> )) | 0.0834                                                              | 0.0899                                                              | 0.0687                                                              |
| <i>wR</i> <sub>2</sub> <sup>[b]</sup> all data                    | 0.2342                                                              | 0.2121                                                              | 0.1477                                                              |
| GOF on <i>F</i> <sup>2</sup>                                      | 1.005                                                               | 1.089                                                               | 1.087                                                               |
| $\rho_{\text{fin}}$ (max/min) (e Å <sup>-3</sup> )                | 0.242, -0.234                                                       | 0.653, -0.296                                                       | 0.292, -0.240                                                       |

<sup>[a]</sup> $R_1 = \sum ||F_o| - |F_c|| / \sum |F_o|$ . <sup>[b]</sup> $wR_2 = \{[\sum w(F_o^2 - F_c^2)^2] / [\sum w(F_o^2)^2]\}^{1/2}$ .

**Table S2** Selected bond lengths (Å) and angles (°) for **1CB**, **2CB** and **4CB**.

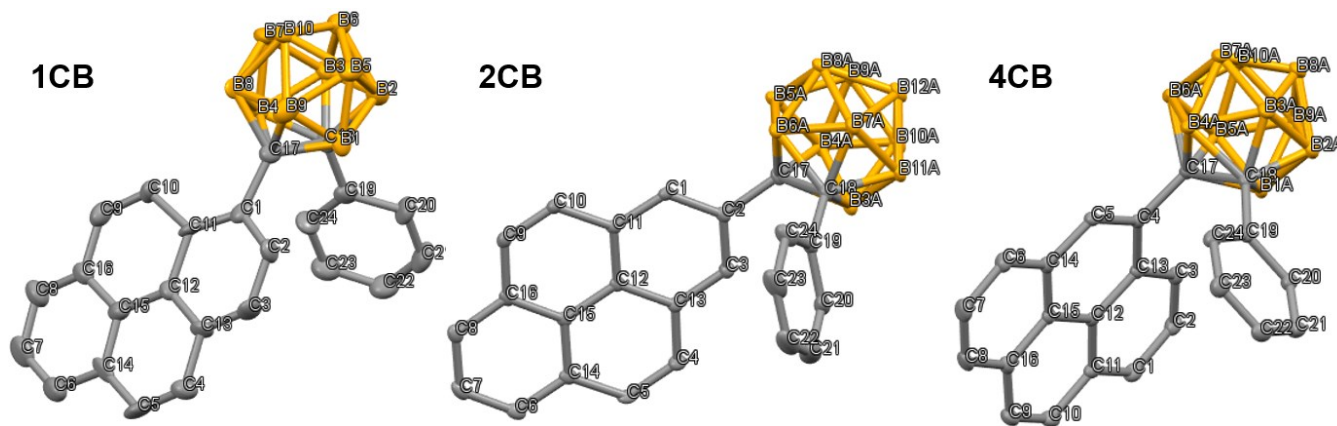

| <b>1CB</b>  |           | <b>2CB</b>  |          | <b>4CB</b>  |            |
|-------------|-----------|-------------|----------|-------------|------------|
| lengths (Å) |           |             |          |             |            |
| C1–C17      | 1.514(18) | C2–C17      | 1.496(5) | C4–C17      | 1.516(3)   |
| C17–C18     | 1.762(18) | C17–C18     | 1.736(5) | C17–C18     | 1.783(3)   |
| C18–C19     | 1.517(19) | C18–C19     | 1.502(5) | C18–C19     | 1.500(3)   |
| angles (°)  |           |             |          |             |            |
| C1–C17–C18  | 120.4(10) | C2–C17–C18  | 119.1(3) | C4–C17–C18  | 118.18(17) |
| C17–C18–C19 | 117.4(11) | C17–C18–C19 | 119.3(3) | C17–C18–C19 | 120.61(17) |

## Computational details

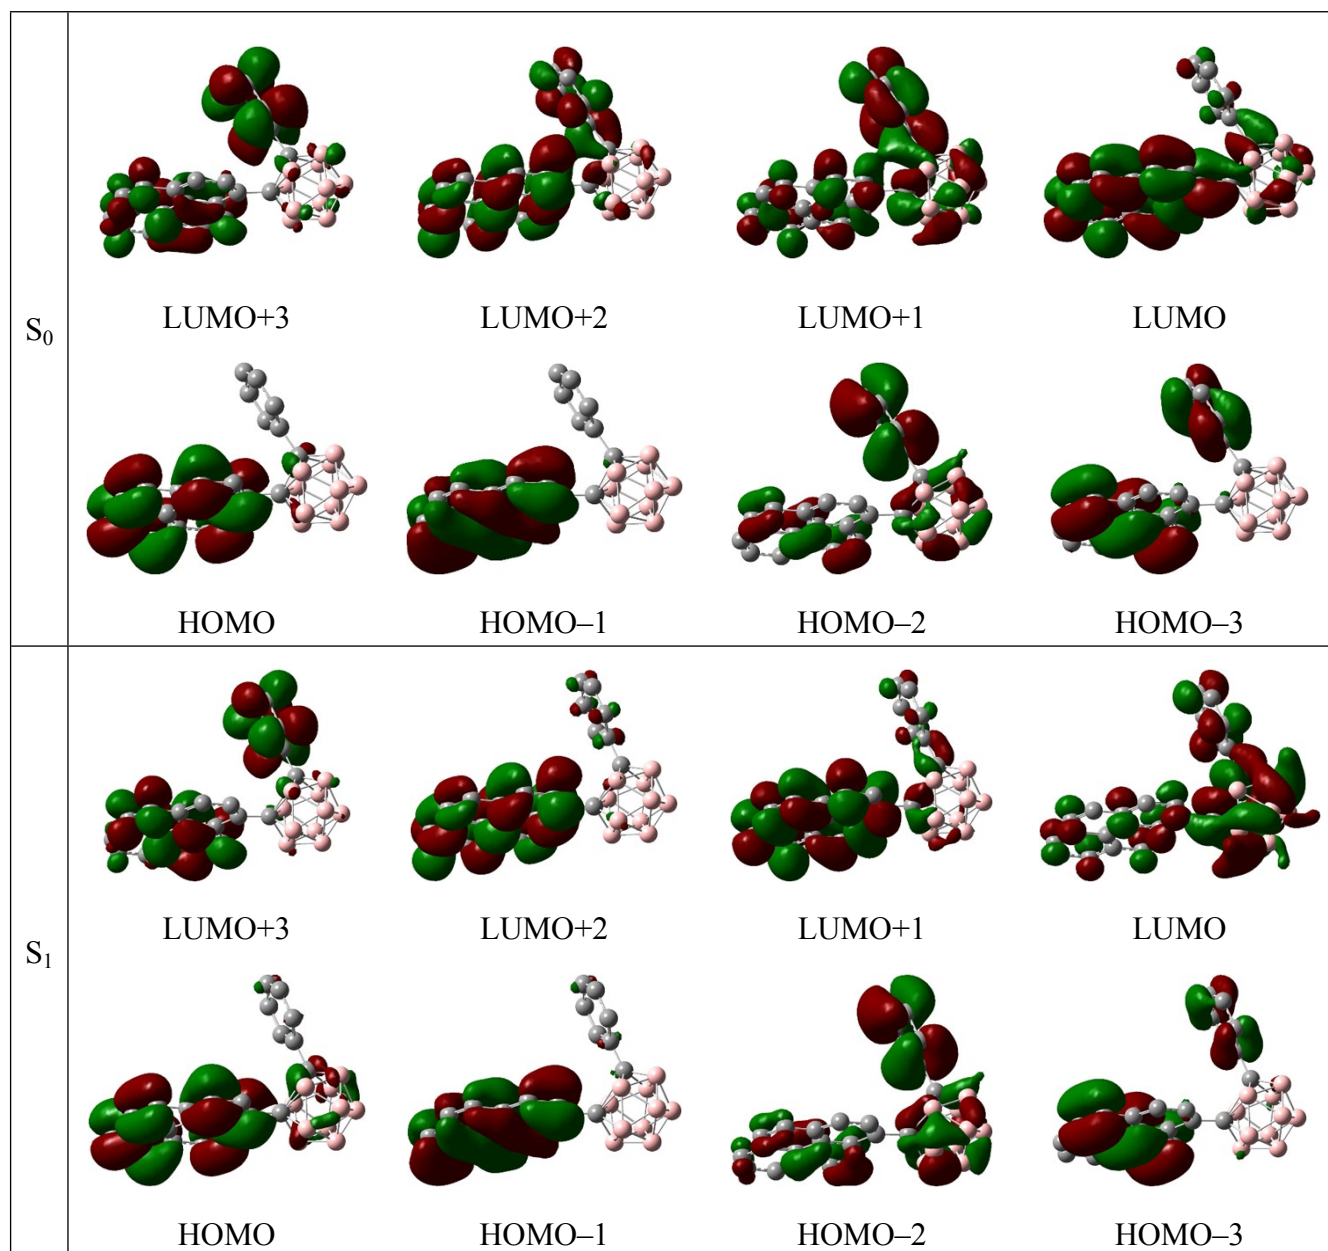

**Fig. S12** The selected frontier orbitals of **1CB** from B3LYP calculations (Isovalue = 0.04 a.u.) at the ground state ( $S_0$ ) and first singlet excited state ( $S_1$ ) optimized geometries in THF.

**Table S3** Computed absorption wavelengths ( $\lambda_{\text{calc}}$  in nm) and oscillator strengths ( $f_{\text{calc}}$ ) for **1CB** from TD-B3LYP calculations using the B3LYP geometries at the ground state ( $S_0$ ) and first singlet excited state ( $S_1$ ) optimized geometries in THF.

| state | $\lambda_{\text{calc}}$ (/nm) | $f_{\text{calc}}$ | Major contribution                                                                                                                               |
|-------|-------------------------------|-------------------|--------------------------------------------------------------------------------------------------------------------------------------------------|
| $S_0$ |                               |                   |                                                                                                                                                  |
| 1     | 383.99                        | 0.5213            | HOMO $\rightarrow$ LUMO (92.8%)                                                                                                                  |
| 2     | 340.17                        | 0.0347            | HOMO-1 $\rightarrow$ LUMO (59.0%)<br>HOMO $\rightarrow$ LUMO+1 (11.9%)<br>HOMO $\rightarrow$ LUMO+2 (25.7%)                                      |
| 3     | 316.51                        | 0.0635            | HOMO $\rightarrow$ LUMO+1 (79.6%)<br>HOMO $\rightarrow$ LUMO+2 (8.7%)                                                                            |
| 4     | 293.92                        | 0.0266            | HOMO-3 $\rightarrow$ LUMO (50.6%)<br>HOMO-2 $\rightarrow$ LUMO (11.1%)<br>HOMO $\rightarrow$ LUMO+2 (21.0%)                                      |
| 5     | 284.80                        | 0.1973            | HOMO-3 $\rightarrow$ LUMO (18.4%)<br>HOMO-2 $\rightarrow$ LUMO (13.0%)<br>HOMO-1 $\rightarrow$ LUMO (22.5%)<br>HOMO $\rightarrow$ LUMO+2 (33.4%) |
| $S_1$ |                               |                   |                                                                                                                                                  |
| 1     | 624.71                        | 0.3977            | HOMO $\rightarrow$ LUMO (99.6%)                                                                                                                  |
| 2     | 429.10                        | 0.1773            | HOMO $\rightarrow$ LUMO+1 (97.9%)                                                                                                                |
| 3     | 390.45                        | 0.0185            | HOMO-2 $\rightarrow$ LUMO (29.6%)<br>HOMO-1 $\rightarrow$ LUMO (61.9%)                                                                           |
| 4     | 387.95                        | 0.0146            | HOMO-3 $\rightarrow$ LUMO (92.7%)                                                                                                                |
| 5     | 380.06                        | 0.1158            | HOMO-4 $\rightarrow$ LUMO (67.7%)<br>HOMO-1 $\rightarrow$ LUMO +1(28.1%)                                                                         |



**Table S4** Molecular orbital energies (in eV) and molecular orbital distributions (in %) of **1CB** at the ground state ( $S_0$ ) and first singlet excited state ( $S_1$ ) optimized geometries in THF.

|        | E (eV) | carborane | pyrene | Car-phenyl |
|--------|--------|-----------|--------|------------|
|        |        | $S_0$     |        |            |
| LUMO+3 | -0.48  | 7.1       | 31.2   | 61.7       |
| LUMO+2 | -1.01  | 6.2       | 79.9   | 13.9       |
| LUMO+1 | -1.36  | 33.0      | 31.0   | 35.9       |
| LUMO   | -2.17  | 22.1      | 74.7   | 3.2        |
| HOMO   | -5.69  | 3.2       | 96.6   | 0.2        |
| HOMO-1 | -6.57  | 1.3       | 98.1   | 0.5        |
| HOMO-2 | -7.15  | 10.7      | 16.6   | 72.8       |
| HOMO-3 | -7.16  | 2.4       | 75.9   | 21.7       |
|        |        | $S_1$     |        |            |
| LUMO+3 | -0.49  | 5.6       | 48.6   | 45.8       |
| LUMO+2 | -0.97  | 2.7       | 94.8   | 2.5        |
| LUMO+1 | -1.87  | 5.6       | 91.7   | 2.6        |
| LUMO   | -3.43  | 76.7      | 10.6   | 12.7       |
| HOMO   | -5.62  | 5.6       | 92.9   | 1.5        |
| HOMO-1 | -6.64  | 2.4       | 96.2   | 1.4        |
| HOMO-2 | -7.11  | 16.5      | 17.5   | 66.0       |
| HOMO-3 | -7.18  | 3.2       | 86.1   | 10.8       |

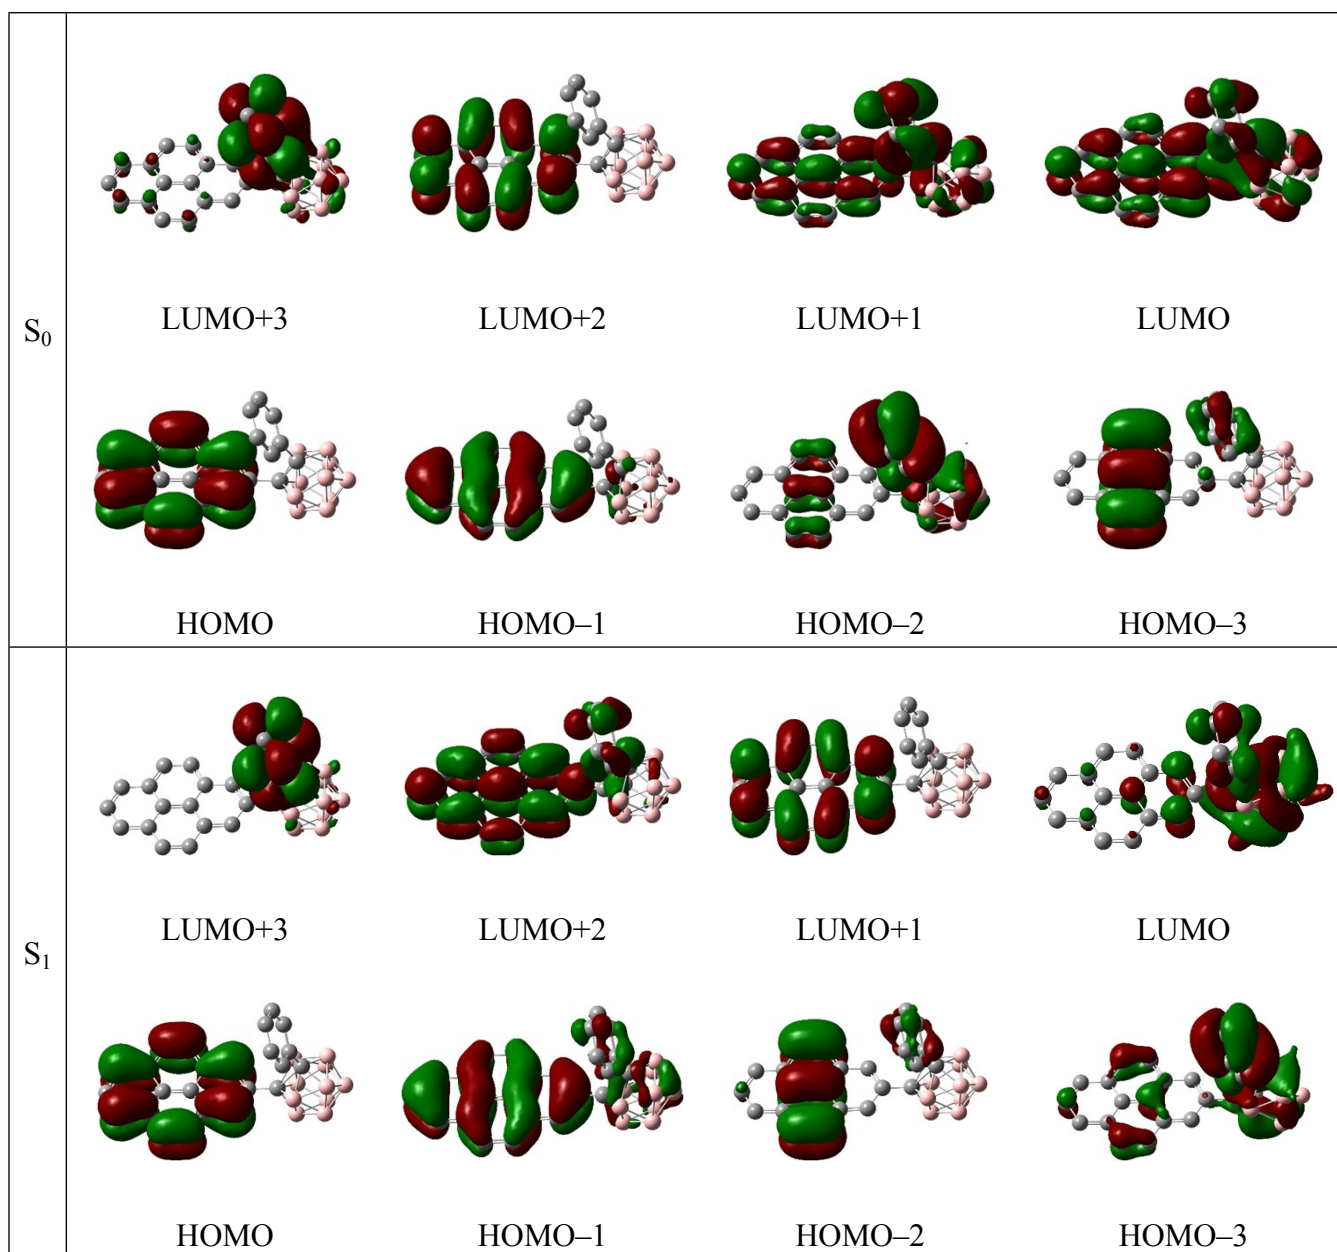

**Fig. S13** The selected frontier orbitals of **2CB** from B3LYP calculations (Isovalue = 0.04 a.u.) at the ground state (S<sub>0</sub>) and first singlet excited state (S<sub>1</sub>) optimized geometries in THF.

**Table S5** Computed absorption wavelengths ( $\lambda_{\text{calc}}$  in nm) and oscillator strengths ( $f_{\text{calc}}$ ) for **2CB** from TD-B3LYP calculations using the B3LYP geometries at the ground state ( $S_0$ ) and first singlet excited state ( $S_1$ ) optimized geometries in THF.

| state | $\lambda_{\text{calc}}$ (/nm) | $f_{\text{calc}}$ | Major contribution                                                                              |
|-------|-------------------------------|-------------------|-------------------------------------------------------------------------------------------------|
| $S_0$ |                               |                   |                                                                                                 |
| 1     | 344.82                        | 0.4191            | HOMO → LUMO (91.6%)                                                                             |
| 2     | 307.08                        | 0.0095            | HOMO-1 → LUMO (22.8%)<br>HOMO → LUMO (13.6%)<br>HOMO → LUMO+1 (62.2%)                           |
| 3     | 282.13                        | 0.0983            | HOMO-3 → LUMO (9.7%)<br>HOMO-1 → LUMO (30.1%)<br>HOMO → LUMO+1 (22.9%)<br>HOMO → LUMO+2 (31.5%) |
| 4     | 274.18                        | 0.1330            | HOMO-1 → LUMO (25.2%)<br>HOMO → LUMO+2 (11.2%)<br>HOMO → LUMO+4 (47.1%)                         |
| 5     | 269.00                        | 0.2621            | HOMO-1 → LUMO+1 (86.7%)                                                                         |
| $S_1$ |                               |                   |                                                                                                 |
| 1     | 624.67                        | 0.1029            | HOMO → LUMO (99.7%)                                                                             |
| 2     | 417.36                        | 0.4173            | HOMO → LUMO+1 (98.9%)                                                                           |
| 3     | 398.45                        | 0.0033            | HOMO-1 → LUMO (97.3%)                                                                           |
| 4     | 393.85                        | 0.0495            | HOMO-2 → LUMO (96.9%)                                                                           |
| 5     | 384.21                        | 0.2714            | HOMO-3 → LUMO (90.7%)<br>HOMO → LUMO+1 (7.6%)                                                   |

**Table S6** Molecular orbital energies (in eV) and molecular orbital distributions (in %) of **2CB** at the ground state ( $S_0$ ) and first singlet excited state ( $S_1$ ) optimized geometries in THF.

|        | E (eV) | carborane | pyrene | Car-phenyl |
|--------|--------|-----------|--------|------------|
|        |        | $S_0$     |        |            |
| LUMO+3 | -0.50  | 8.9       | 4.6    | 86.5       |
| LUMO+2 | -0.99  | 1.6       | 97.8   | 0.7        |
| LUMO+1 | -1.52  | 27.1      | 32.7   | 40.2       |
| LUMO   | -1.38  | 23.8      | 61.1   | 15.0       |
| HOMO   | -5.66  | 0.4       | 99.5   | 0.1        |
| HOMO-1 | -6.56  | 4.4       | 95.4   | 0.2        |
| HOMO-2 | -7.17  | 10.3      | 9.2    | 80.5       |
| HOMO-3 | -7.18  | 1.1       | 90.8   | 8.0        |
|        |        | $S_1$     |        |            |
| LUMO+3 | -0.52  | 7.1       | 0.6    | 92.4       |
| LUMO+2 | -0.93  | 5.2       | 79.0   | 15.8       |
| LUMO+1 | -1.94  | 1.2       | 98.8   | 0.0        |
| LUMO   | -3.52  | 75.8      | 10.7   | 13.4       |
| HOMO   | -5.51  | 0.4       | 99.6   | 0.0        |
| HOMO-1 | -6.60  | 7.3       | 87.7   | 5.0        |
| HOMO-2 | -7.13  | 1.3       | 93.2   | 5.5        |
| HOMO-3 | -7.20  | 17.6      | 12.3   | 70.1       |

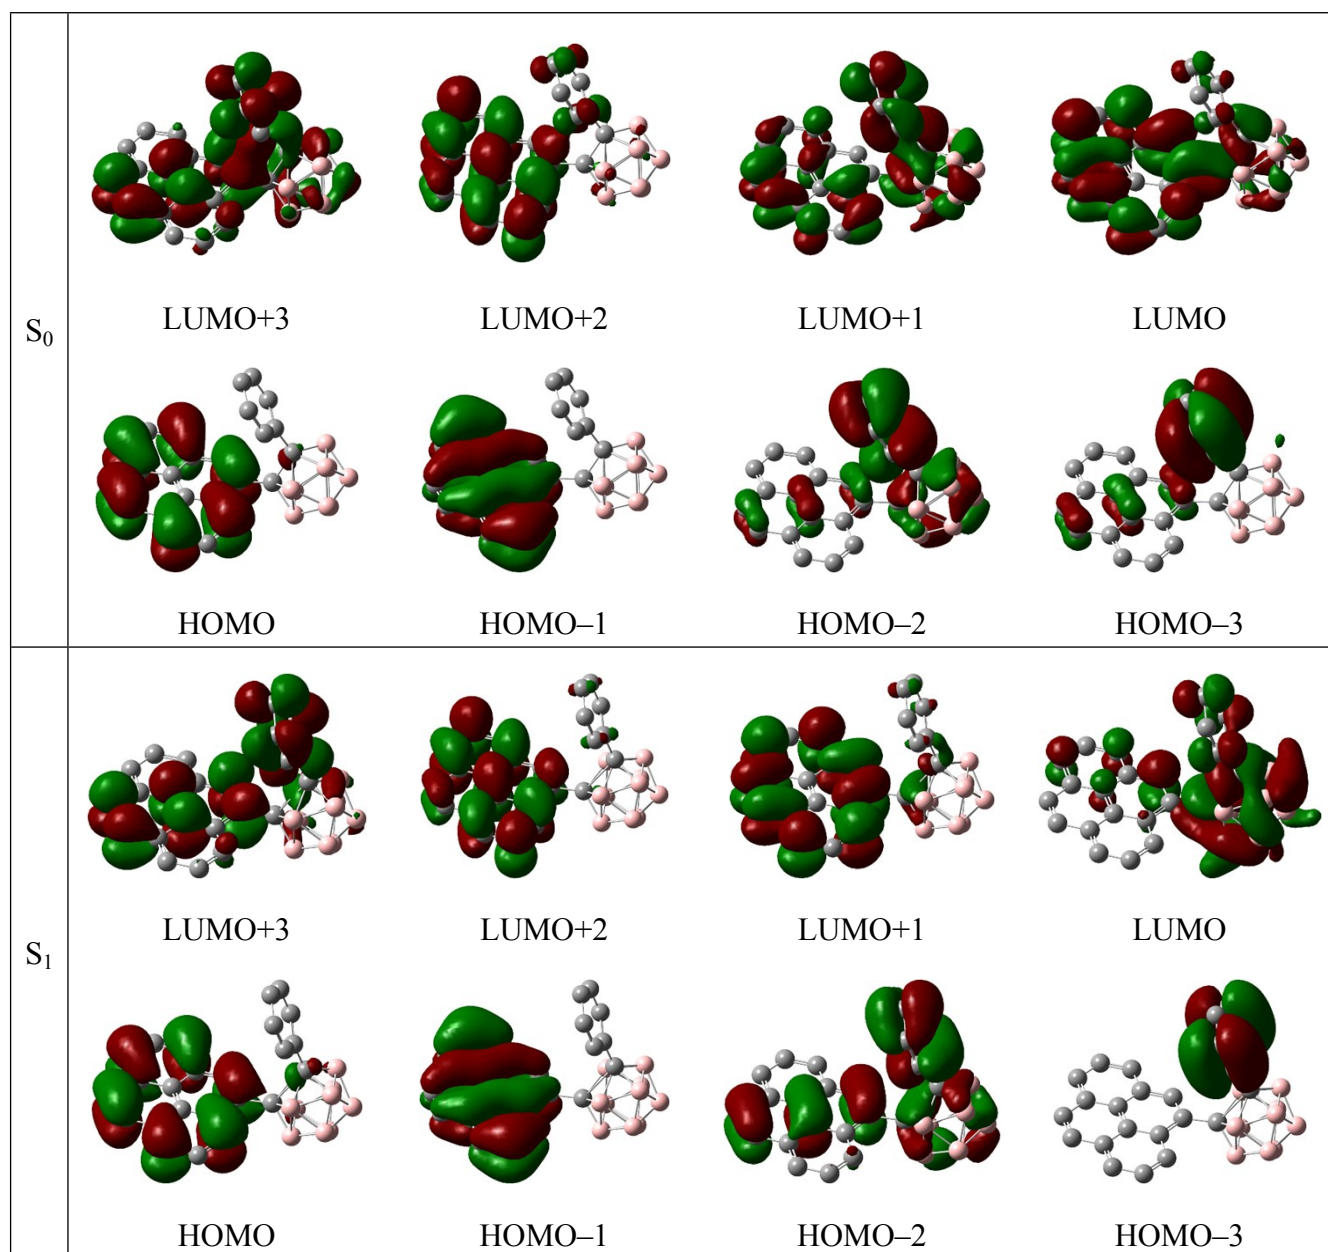

**Fig. S14** The selected frontier orbitals of **4CB** from B3LYP calculations (Isovalue = 0.04 a.u.) at the ground state ( $S_0$ ) and first singlet excited state ( $S_1$ ) optimized geometries in THF.

**Table S7** Computed absorption wavelengths ( $\lambda_{\text{calc}}$  in nm) and oscillator strengths ( $f_{\text{calc}}$ ) for **4CB** from TD-B3LYP calculations using the B3LYP geometries at the ground state ( $S_0$ ) and first singlet excited state ( $S_1$ ) optimized geometries in THF.

| state | $\lambda_{\text{calc}}$ (/nm) | $f_{\text{calc}}$ | Major contribution                                                                                            |
|-------|-------------------------------|-------------------|---------------------------------------------------------------------------------------------------------------|
| $S_0$ |                               |                   |                                                                                                               |
| 1     | 377.51                        | 0.2133            | HOMO $\rightarrow$ LUMO (88.8%)<br>HOMO $\rightarrow$ LUMO+1 (7.3%)                                           |
| 2     | 336.59                        | 0.0173            | HOMO-1 $\rightarrow$ LUMO (58.8%)<br>HOMO $\rightarrow$ LUMO+2 (31.0%)                                        |
| 3     | 322.62                        | 0.1194            | HOMO $\rightarrow$ LUMO+1 (82.5%)                                                                             |
| 4     | 290.82                        | 0.1904            | HOMO-1 $\rightarrow$ LUMO (33.3%)<br>HOMO-1 $\rightarrow$ LUMO+1 (14.7%)<br>HOMO $\rightarrow$ LUMO+2 (46.4%) |
| 5     | 286.74                        | 0.0147            | HOMO $\rightarrow$ LUMO+3 (86.7%)                                                                             |
| $S_1$ |                               |                   |                                                                                                               |
| 1     | 646.41                        | 0.1453            | HOMO $\rightarrow$ LUMO (99.6%)                                                                               |
| 2     | 476.65                        | 0.0514            | HOMO-1 $\rightarrow$ LUMO (99.3%)                                                                             |
| 3     | 408.09                        | 0.2582            | HOMO $\rightarrow$ LUMO+1 (96.1%)                                                                             |
| 4     | 397.72                        | 0.0026            | HOMO-2 $\rightarrow$ LUMO (97.8%)                                                                             |
| 5     | 377.76                        | 0.1931            | HOMO-4 $\rightarrow$ LUMO (7.5%)<br>HOMO-3 $\rightarrow$ LUMO (82.3%)                                         |

**Table S8** Molecular orbital energies (in eV) and molecular orbital distributions (in %) of **4CB** at the ground state ( $S_0$ ) and first singlet excited state ( $S_1$ ) optimized geometries in THF.

|        | E (eV) | carborane | pyrene | Car-phenyl |
|--------|--------|-----------|--------|------------|
|        |        | $S_0$     |        |            |
| LUMO+3 | -0.69  | 13.0      | 50.2   | 36.8       |
| LUMO+2 | -0.99  | 3.8       | 89.9   | 6.3        |
| LUMO+1 | -1.38  | 33.9      | 33.7   | 32.4       |
| LUMO   | -2.05  | 20.6      | 75.5   | 3.9        |
| HOMO   | -5.68  | 2.1       | 97.8   | 0.1        |
| HOMO-1 | -6.52  | 0.4       | 99.3   | 0.2        |
| HOMO-2 | -7.15  | 11.8      | 9.7    | 78.5       |
| HOMO-3 | -7.18  | 1.8       | 10.2   | 87.9       |
|        |        | $S_1$     |        |            |
| LUMO+3 | -0.61  | 6.6       | 59.0   | 34.4       |
| LUMO+2 | -0.91  | 1.9       | 96.3   | 1.8        |
| LUMO+1 | -1.90  | 4.4       | 93.7   | 1.9        |
| LUMO   | -3.50  | 75.5      | 12.0   | 12.5       |
| HOMO   | -5.57  | 4.2       | 95.0   | 0.8        |
| HOMO-1 | -6.61  | 0.7       | 98.7   | 0.5        |
| HOMO-2 | -7.03  | 12.7      | 41.8   | 45.5       |
| HOMO-3 | -7.23  | 1.5       | 0.1    | 98.3       |

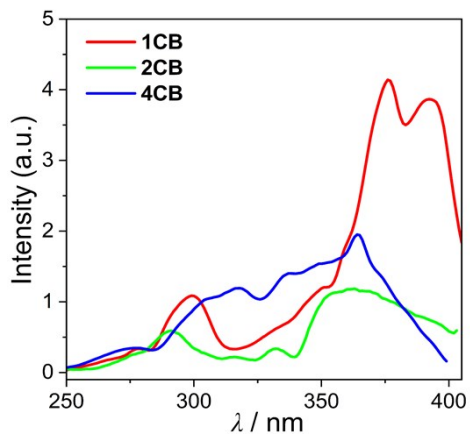

**Fig. S15** Excitation graphs in THF ( $3.0 \times 10^{-5}$  M) of of **1CB**, **2CB** and **4CB**.

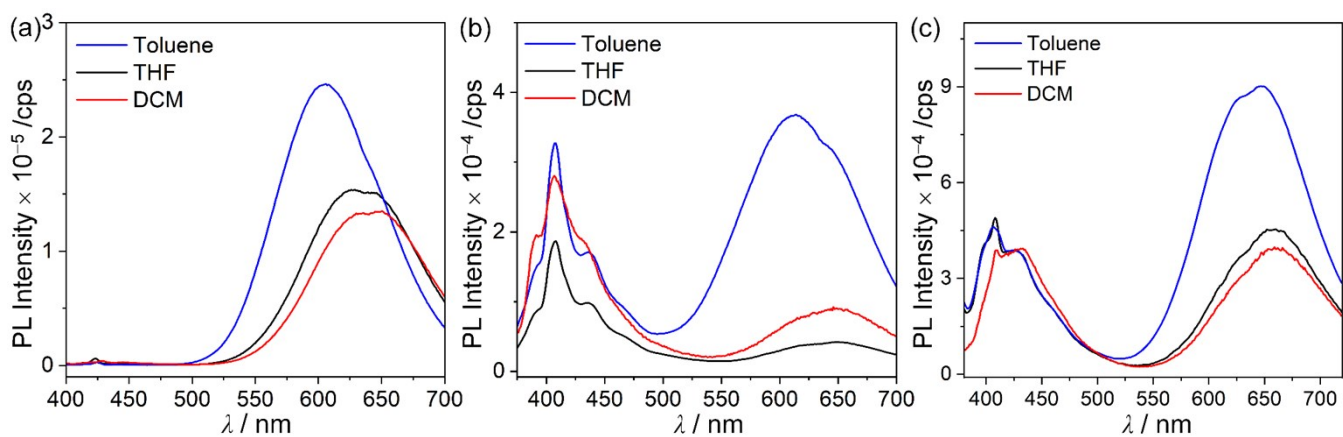

**Fig. S16** PL spectra of (a) **1CB**, (b) **2CB**, and (c) **4CB** in various organic solvents ( $3.0 \times 10^{-5}$  M,  $\lambda_{\text{ex}} = 376$  nm for **1CB**, 362 nm for **2CB** and 364 nm for **4CB**, respectively).

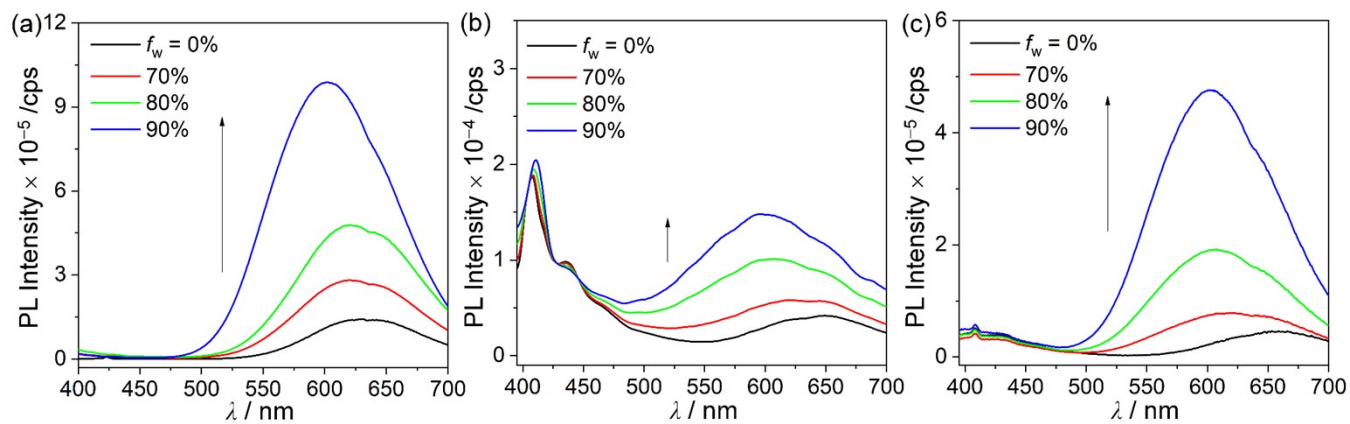

**Fig. S17** PL spectra of (a) **1CB**, (b) **2CB**, and (c) **4CB** in THF/distilled water mixtures ( $3.0 \times 10^{-5}$  M).



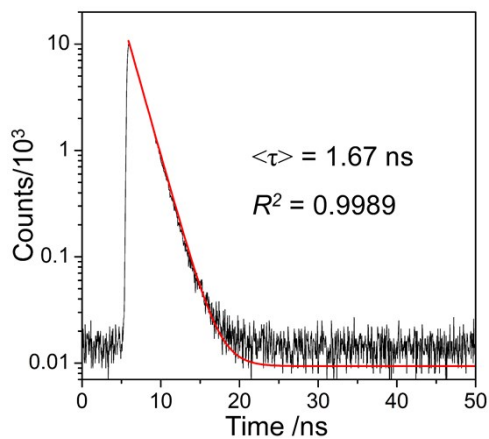

**Fig. S18** Emission decay curve for **1CB** in THF ( $3.0 \times 10^{-5}$  M) detected at 628 nm. The red-line is its single exponential fitting curve.

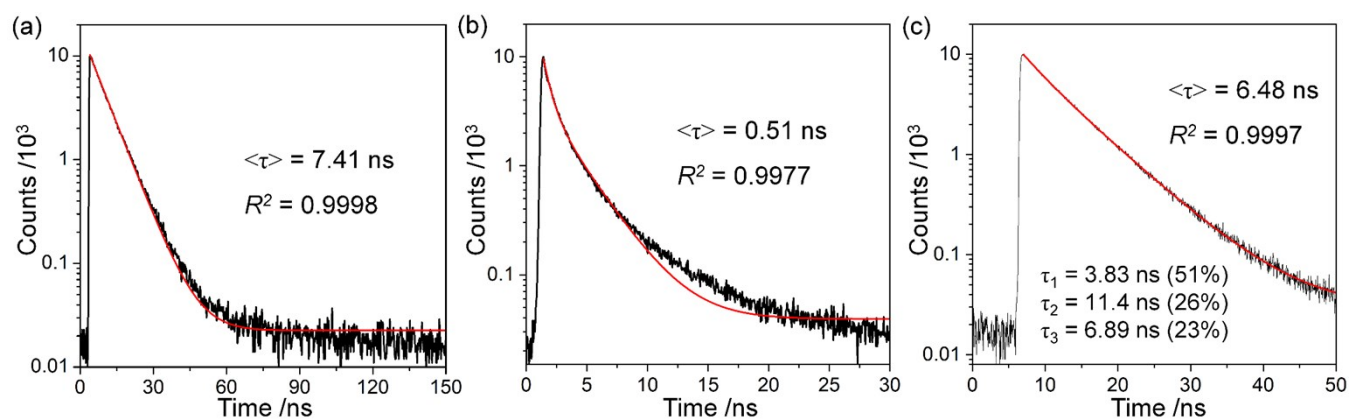

**Fig. S19** Emission decay curves for (a) **1CB**, (b) **2CB**, and (c) **4CB** in the film state (5 wt% doped in PMMA) detected at 574 nm for **1CB**, 579 nm for **2CB** and 580 nm for **4CB** at 298 K. Each red-line is its single (for **1CB** and **2CB**) or triple (for **4CB**) exponential fitting curve.

**Table S9** Cartesian coordinates of the ground state ( $S_0$ ) fully optimized geometry in THF of **1CB** from B3LYP calculations (in Å).

| Atom | x         | y         | z         |   |           |           |           |   |          |           |           |
|------|-----------|-----------|-----------|---|-----------|-----------|-----------|---|----------|-----------|-----------|
|      |           |           |           | H | -4.688924 | -2.213901 | -2.661015 | B | 2.967639 | -0.138226 | 1.345971  |
| C    | 2.745334  | 0.209231  | -0.321139 | C | -3.477203 | -1.284834 | -1.142358 | H | 2.812615 | 0.717023  | 2.134352  |
| C    | 1.596661  | -0.913473 | 0.582223  | C | -2.253024 | -1.925214 | -1.508411 | B | 2.550083 | -1.837197 | 1.653627  |
| C    | 0.212971  | -0.415526 | 0.946224  | H | -2.265525 | -2.642000 | -2.324773 | H | 2.051921 | -2.125225 | 2.687043  |
| C    | 0.112870  | 0.409056  | 2.081044  | C | -1.084329 | -1.670948 | -0.856880 | B | 1.972654 | -2.500647 | 0.116057  |
| H    | 0.997012  | 0.618059  | 2.663733  | H | -0.211985 | -2.214779 | -1.172566 | H | 1.087793 | -3.281098 | 0.077567  |
| C    | -1.078677 | 0.976466  | 2.497320  | C | -0.991717 | -0.739731 | 0.239298  | B | 2.045334 | -1.161120 | -1.071512 |
| H    | -1.092396 | 1.611919  | 3.377583  | C | -2.227301 | -0.128023 | 0.661977  | H | 1.249147 | -0.993075 | -1.916368 |
| C    | -2.263355 | 0.748450  | 1.789523  | C | -3.452157 | -0.389218 | -0.034323 | B | 4.245910 | -1.352678 | 1.434870  |
| C    | -3.499522 | 1.362485  | 2.184971  | C | 2.271586  | 1.581627  | -0.712339 | H | 4.996122 | -1.364633 | 2.353970  |
| H    | -3.489524 | 2.025846  | 3.044862  | C | 2.538369  | 2.686744  | 0.112357  | B | 3.635130 | -2.825845 | 0.643056  |
| C    | -4.652457 | 1.125305  | 1.504446  | H | 3.068603  | 2.552272  | 1.047024  | H | 3.946006 | -3.918542 | 0.987125  |
| H    | -5.582276 | 1.597421  | 1.808811  | C | 2.140130  | 3.967873  | -0.264895 | B | 3.294361 | -2.420170 | -1.063776 |
| C    | -4.670249 | 0.240171  | 0.374812  | H | 2.357571  | 4.808005  | 0.387074  | H | 3.359009 | -3.208261 | -1.948234 |
| C    | -5.854155 | -0.025132 | -0.332568 | C | 1.470073  | 4.169405  | -1.472225 | B | 3.750974 | -0.725797 | -1.323184 |
| H    | -6.773688 | 0.460645  | -0.018499 | H | 1.158803  | 5.167457  | -1.764686 | H | 4.052855 | -0.252464 | -2.364302 |
| C    | -5.860497 | -0.898373 | -1.419232 | C | 1.210154  | 3.080148  | -2.304647 | B | 4.334615 | -0.071799 | 0.213588  |
| H    | -6.786496 | -1.091647 | -1.951829 | H | 0.698256  | 3.224734  | -3.250783 | H | 5.050031 | 0.868704  | 0.263070  |
| C    | -4.684349 | -1.526828 | -1.819600 | C | 1.608698  | 1.797802  | -1.930955 | B | 4.725986 | -1.745313 | -0.239907 |
|      |           |           |           | H | 1.408401  | 0.968266  | -2.597036 | H | 5.836109 | -2.045529 | -0.533814 |

**Table S10** Cartesian coordinates of the first singlet excited state ( $S_1$ ) fully optimized geometry in THF of **1CB** from B3LYP calculations (in Å).

| Atom | x         | y         | z         |   |           |           |           |   |          |           |           |
|------|-----------|-----------|-----------|---|-----------|-----------|-----------|---|----------|-----------|-----------|
|      |           |           |           | H | -4.780389 | -0.706512 | -3.372766 | B | 2.690255 | -0.640389 | 1.221628  |
| C    | 3.072169  | 0.207803  | -0.260016 | C | -3.635465 | -0.507368 | -1.549686 | H | 2.549922 | 0.023764  | 2.191726  |
| C    | 1.278811  | -1.238658 | 0.419047  | C | -2.428711 | -1.034225 | -2.075154 | B | 2.108074 | -2.396461 | 1.237072  |
| C    | -0.080949 | -0.785144 | 0.890603  | H | -2.403094 | -1.368571 | -3.107528 | H | 1.577324 | -2.873580 | 2.185985  |
| C    | -0.208051 | -0.421123 | 2.236273  | C | -1.291357 | -1.131950 | -1.299994 | B | 1.581041 | -2.588957 | -0.461738 |
| H    | 0.653854  | -0.497625 | 2.884585  | H | -0.406475 | -1.550215 | -1.749526 | H | 0.659544 | -3.241199 | -0.824704 |
| C    | -1.398346 | 0.058146  | 2.775642  | C | -1.260952 | -0.712356 | 0.062517  | B | 1.960669 | -0.868041 | -1.096344 |
| H    | -1.435319 | 0.340337  | 3.823530  | C | -2.483355 | -0.204667 | 0.617327  | H | 1.281379 | -0.368155 | -1.926312 |
| C    | -2.554376 | 0.194357  | 1.983154  | C | -3.656590 | -0.097557 | -0.185092 | B | 3.843698 | -2.064139 | 1.227775  |
| C    | -3.773371 | 0.702210  | 2.518224  | C | 2.932572  | 1.665251  | -0.360671 | H | 4.489575 | -2.406646 | 2.166447  |
| H    | -3.800025 | 0.999115  | 3.562093  | C | 3.214846  | 2.501312  | 0.741483  | B | 3.150092 | -3.235290 | 0.060284  |
| C    | -4.897432 | 0.816989  | 1.735447  | H | 3.529737  | 2.057470  | 1.679427  | H | 3.311254 | -4.412644 | 0.129516  |
| H    | -5.820567 | 1.207988  | 2.151345  | C | 3.104192  | 3.884450  | 0.636304  | B | 2.996081 | -2.338147 | -1.488581 |
| C    | -4.866690 | 0.419457  | 0.368933  | H | 3.331690  | 4.506841  | 1.496857  | H | 3.032418 | -2.877340 | -2.548672 |
| C    | -6.016801 | 0.520475  | -0.457272 | C | 2.704595  | 4.473049  | -0.567562 | B | 3.787193 | -0.766208 | -1.340275 |
| H    | -6.933118 | 0.914685  | -0.028623 | H | 2.616253  | 5.552262  | -0.646862 | H | 4.272784 | -0.247647 | -2.291951 |
| C    | -5.984734 | 0.121711  | -1.789303 | C | 2.422052  | 3.659221  | -1.669021 | B | 4.328762 | -0.596351 | 0.380846  |
| H    | -6.875247 | 0.206478  | -2.402456 | H | 2.115911  | 4.105546  | -2.610702 | H | 5.234109 | 0.060871  | 0.779208  |
| C    | -4.809250 | -0.389844 | -2.334631 | C | 2.531380  | 2.275566  | -1.568960 | B | 4.449942 | -2.174270 | -0.454113 |
|      |           |           |           | H | 2.312823  | 1.655747  | -2.431508 | H | 5.521503 | -2.602328 | -0.747441 |

**Table S11** Cartesian coordinates of **1CB** at  $\Psi = 0^\circ$  in THF from B3LYP calculations (in Å).

| Atom | x         | y         | z         |   |           |           |           |   |           |           |           |
|------|-----------|-----------|-----------|---|-----------|-----------|-----------|---|-----------|-----------|-----------|
|      |           |           |           | H | 5.876267  | -2.631222 | -0.000402 | B | -2.184394 | -1.040665 | -1.371741 |
| C    | -2.957728 | -0.335707 | -0.000043 | C | 4.242074  | -1.228972 | -0.000328 | H | -1.909127 | -0.363505 | -2.297298 |
| C    | -1.107342 | -1.016140 | -0.000422 | C | 3.200019  | -2.207588 | -0.000721 | B | -1.165136 | -2.424274 | -0.896443 |
| C    | 0.074403  | -0.056693 | -0.000497 | H | 3.474817  | -3.258747 | -0.000978 | H | -0.236112 | -2.666623 | -1.582349 |
| C    | -0.192216 | 1.318210  | -0.000300 | C | 1.884193  | -1.858889 | -0.000793 | B | -1.164676 | -2.423739 | 0.896563  |
| H    | -1.211596 | 1.664225  | -0.000410 | H | 1.161485  | -2.655302 | -0.001148 | H | -0.234934 | -2.665691 | 1.581641  |
| C    | 0.806568  | 2.278530  | -0.000064 | C | 1.441924  | -0.485905 | -0.000498 | B | -2.183960 | -1.040134 | 1.371882  |
| H    | 0.537330  | 3.330525  | 0.000058  | C | 2.478541  | 0.517980  | -0.000193 | H | -1.907484 | -0.362164 | 2.296488  |
| C    | 2.153828  | 1.908964  | 0.000045  | C | 3.862731  | 0.144835  | -0.000088 | B | -2.818177 | -2.721079 | -1.438930 |
| C    | 3.199529  | 2.893872  | 0.000391  | C | -3.355017 | 1.112037  | -0.000134 | H | -3.010695 | -3.260306 | -2.477745 |
| H    | 2.914702  | 3.942094  | 0.000575  | C | -3.591175 | 1.786528  | -1.209790 | B | -2.188616 | -3.574927 | 0.000630  |
| C    | 4.509058  | 2.530347  | 0.000506  | H | -3.427746 | 1.280900  | -2.153912 | H | -1.927324 | -4.732708 | 0.000619  |
| H    | 5.293227  | 3.282201  | 0.000779  | C | -4.036248 | 3.106786  | -1.207266 | B | -2.817476 | -2.720493 | 1.440054  |
| C    | 4.886427  | 1.145242  | 0.000276  | H | -4.212868 | 3.612710  | -2.151062 | H | -3.009326 | -3.259171 | 2.479277  |
| C    | 6.234438  | 0.751372  | 0.000395  | C | -4.256805 | 3.772903  | -0.000221 | B | -3.869642 | -1.421159 | 0.892211  |
| H    | 7.005148  | 1.516986  | 0.000675  | H | -4.602550 | 4.801852  | -0.000247 | H | -4.751038 | -0.958755 | 1.530392  |
| C    | 6.588381  | -0.596883 | 0.000157  | C | -4.035712 | 3.107029  | 1.206861  | B | -3.870082 | -1.421439 | -0.891159 |
| H    | 7.636348  | -0.880512 | 0.000252  | H | -4.211915 | 3.613148  | 2.150631  | H | -4.751774 | -0.959652 | -1.529365 |
| C    | 5.602451  | -1.579972 | -0.000207 | C | -3.590626 | 1.786778  | 1.209477  | B | -3.842170 | -2.965787 | 0.000821  |
|      |           |           |           | H | -3.426731 | 1.281361  | 2.153638  | H | -4.796641 | -3.671149 | 0.001205  |

**Table S12** Cartesian coordinates of **1CB** at  $\Psi = 22.5^\circ$  in THF from B3LYP calculations (in Å).

| Atom | x         | y         | z         |   |           |           |           |   |          |           |           |
|------|-----------|-----------|-----------|---|-----------|-----------|-----------|---|----------|-----------|-----------|
|      |           |           |           | H | -5.748071 | -2.694240 | 0.567045  | B | 2.022689 | -1.093923 | 1.330437  |
| C    | 2.899215  | -0.266122 | 0.119223  | C | -4.146031 | -1.304469 | 0.193188  | H | 1.545279 | -0.498858 | 2.228424  |
| C    | 1.185654  | -1.046338 | -0.220840 | C | -3.111371 | -2.285220 | 0.078683  | B | 1.202543 | -2.502245 | 0.633811  |
| C    | -0.022606 | -0.134987 | -0.373601 | H | -3.383112 | -3.335835 | 0.131546  | H | 0.223802 | -2.859036 | 1.178538  |
| C    | 0.205758  | 1.200404  | -0.737361 | C | -1.809796 | -1.936780 | -0.118066 | B | 1.452915 | -2.431369 | -1.133377 |
| H    | 1.204459  | 1.527549  | -0.973805 | H | -1.092312 | -2.728632 | -0.246407 | H | 0.619263 | -2.700276 | -1.928354 |
| C    | -0.803071 | 2.149788  | -0.781669 | C | -1.379710 | -0.564170 | -0.212967 | B | 2.432613 | -0.960566 | -1.407373 |
| H    | -0.561406 | 3.175643  | -1.042892 | C | -2.422128 | 0.431167  | -0.222144 | H | 2.264774 | -0.249789 | -2.333365 |
| C    | -2.122821 | 1.804202  | -0.476941 | C | -3.787152 | 0.062784  | 0.009790  | B | 2.768812 | -2.717798 | 1.415948  |
| C    | -3.171026 | 2.785661  | -0.445580 | C | 3.152645  | 1.211652  | 0.236341  | H | 2.833182 | -3.298469 | 2.448294  |
| H    | -2.908237 | 3.822155  | -0.636604 | C | 2.938297  | 1.891556  | 1.444854  | B | 2.425179 | -3.539181 | -0.134722 |
| C    | -4.457154 | 2.433229  | -0.180578 | H | 2.534327  | 1.366306  | 2.301013  | H | 2.256399 | -4.711434 | -0.212929 |
| H    | -5.242020 | 3.183807  | -0.151226 | C | 3.245499  | 3.246814  | 1.558408  | B | 3.192589 | -2.577602 | -1.429556 |
| C    | -4.811628 | 1.060945  | 0.049663  | H | 3.071931  | 3.755451  | 2.501352  | H | 3.592352 | -3.044784 | -2.443993 |
| C    | -6.138249 | 0.674962  | 0.301814  | C | 3.773936  | 3.943510  | 0.471230  | B | 4.038181 | -1.225654 | -0.667161 |
| H    | -6.909736 | 1.438854  | 0.340240  | H | 4.011605  | 4.998781  | 0.561804  | H | 4.969253 | -0.670288 | -1.137810 |
| C    | -6.471121 | -0.665028 | 0.494656  | C | 4.000855  | 3.273334  | -0.732791 | B | 3.784043 | -1.322991 | 1.091213  |
| H    | -7.503112 | -0.943094 | 0.685304  | H | 4.419084  | 3.802572  | -1.583065 | H | 4.523757 | -0.816970 | 1.862750  |
| C    | -5.486996 | -1.648293 | 0.433108  | C | 3.695929  | 1.919329  | -0.850318 | B | 4.010405 | -2.811414 | 0.139274  |
|      |           |           |           | H | 3.880175  | 1.412531  | -1.790329 | H | 5.006950 | -3.445792 | 0.253385  |

**Table S13** Cartesian coordinates of **1CB** at  $\Psi = 45^\circ$  in THF from B3LYP calculations (in Å).

| Atom | x         | y         | z         |   |           |           |           |   |          |           |           |
|------|-----------|-----------|-----------|---|-----------|-----------|-----------|---|----------|-----------|-----------|
|      |           |           |           | H | -5.209224 | -2.572053 | 1.898304  | B | 2.033169 | -1.319229 | 1.118975  |
| C    | 2.827751  | -0.103707 | 0.158837  | C | -3.810785 | -1.309124 | 0.855783  | H | 1.414178 | -1.008280 | 2.070562  |
| C    | 1.382131  | -0.946014 | -0.419677 | C | -2.631088 | -1.995931 | 1.281400  | B | 1.517524 | -2.607788 | -0.008744 |
| C    | 0.092931  | -0.150585 | -0.602808 | H | -2.733962 | -2.821406 | 1.980327  | H | 0.547357 | -3.240814 | 0.185336  |
| C    | 0.174710  | 1.098802  | -1.241299 | C | -1.391495 | -1.628681 | 0.853081  | B | 1.909736 | -2.067523 | -1.638647 |
| H    | 1.128976  | 1.469235  | -1.578237 | H | -0.547139 | -2.162840 | 1.250660  | H | 1.170277 | -2.253366 | -2.542810 |
| C    | -0.939264 | 1.869781  | -1.530570 | C | -1.176742 | -0.536999 | -0.062539 | B | 2.702369 | -0.496114 | -1.507429 |
| H    | -0.815819 | 2.810488  | -2.058452 | C | -2.341540 | 0.238504  | -0.409300 | H | 2.545808 | 0.360854  | -2.295244 |
| C    | -2.220072 | 1.439132  | -1.172002 | C | -3.646331 | -0.163491 | 0.024209  | B | 3.012184 | -2.784098 | 0.919784  |
| C    | -3.393715 | 2.183725  | -1.533228 | C | 2.754528  | 1.342785  | 0.582420  | H | 3.085416 | -3.568135 | 1.806992  |
| H    | -3.266086 | 3.087818  | -2.121481 | C | 2.171945  | 1.728030  | 1.798464  | B | 2.953664 | -3.249000 | -0.808197 |
| C    | -4.632795 | 1.768832  | -1.157134 | H | 1.728926  | 0.987769  | 2.451918  | H | 2.971227 | -4.384016 | -1.154878 |
| H    | -5.516046 | 2.333295  | -1.442450 | C | 2.157543  | 3.068257  | 2.183992  | B | 3.682683 | -1.937412 | -1.752316 |
| C    | -4.802390 | 0.586695  | -0.360292 | H | 1.699490  | 3.345227  | 3.128218  | H | 4.236397 | -2.100706 | -2.788750 |
| C    | -6.071872 | 0.157581  | 0.060205  | C | 2.729628  | 4.043959  | 1.367632  | B | 4.225770 | -0.693011 | -0.620665 |
| H    | -6.946011 | 0.727196  | -0.242479 | H | 2.718858  | 5.086106  | 1.671222  | H | 5.094581 | 0.084667  | -0.812440 |
| C    | -6.217880 | -0.975329 | 0.859449  | C | 3.319875  | 3.669624  | 0.159553  | B | 3.809729 | -1.205380 | 1.025751  |
| H    | -7.207762 | -1.289018 | 1.176225  | H | 3.773676  | 4.417311  | -0.483192 | H | 4.389490 | -0.779219 | 1.964314  |
| C    | -5.098091 | -1.698788 | 1.261813  | C | 3.332149  | 2.332028  | -0.230625 | B | 4.370255 | -2.400131 | -0.168021 |
|      |           |           |           | H | 3.798407  | 2.059036  | -1.170074 | H | 5.438787 | -2.905236 | -0.060228 |

**Table S14** Cartesian coordinates of **1CB** at  $\Psi = 67.5^\circ$  in THF from B3LYP calculations (in Å).

| Atom | x         | y         | z         |   |           |           |           |   |          |           |           |
|------|-----------|-----------|-----------|---|-----------|-----------|-----------|---|----------|-----------|-----------|
|      |           |           |           | H | -4.879829 | -2.473018 | 2.313768  | B | 2.005941 | -1.254518 | 1.047413  |
| C    | 2.786994  | 0.069361  | 0.275332  | C | -3.602958 | -1.343689 | 0.997768  | H | 1.252428 | -1.042594 | 1.923111  |
| C    | 1.517161  | -0.904935 | -0.568612 | C | -2.387674 | -2.002006 | 1.360078  | B | 1.767376 | -2.543936 | -0.174049 |
| C    | 0.166349  | -0.264709 | -0.844811 | H | -2.425705 | -2.787300 | 2.109934  | H | 0.829247 | -3.255296 | -0.125997 |
| C    | 0.129174  | 0.788780  | -1.774095 | C | -1.193137 | -1.671989 | 0.795516  | B | 2.326856 | -1.895180 | -1.718360 |
| H    | 1.038117  | 1.096427  | -2.265729 | H | -0.325968 | -2.215344 | 1.123704  | H | 1.751501 | -2.110966 | -2.728966 |
| C    | -1.036138 | 1.451772  | -2.117961 | C | -1.060826 | -0.642017 | -0.204247 | B | 2.917546 | -0.256164 | -1.406694 |
| H    | -1.000513 | 2.253560  | -2.849254 | C | -2.275009 | 0.044553  | -0.573219 | H | 2.814507 | 0.622573  | -2.177016 |
| C    | -2.257716 | 1.097647  | -1.538156 | C | -3.530404 | -0.308114 | 0.021798  | B | 3.138063 | -2.613966 | 0.948372  |
| C    | -3.475634 | 1.769232  | -1.895638 | C | 2.467171  | 1.474696  | 0.709817  | H | 3.170013 | -3.427302 | 1.811433  |
| H    | -3.423885 | 2.563912  | -2.634169 | C | 1.801072  | 1.731887  | 1.918015  | B | 3.363769 | -3.003641 | -0.782512 |
| C    | -4.662271 | 1.422741  | -1.330293 | H | 1.482551  | 0.913678  | 2.551041  | H | 3.554280 | -4.112254 | -1.161462 |
| H    | -5.579060 | 1.935103  | -1.608076 | C | 1.548293  | 3.041539  | 2.323685  | B | 4.071408 | -1.577097 | -1.570354 |
| C    | -4.731311 | 0.374221  | -0.352658 | H | 1.030303  | 3.218184  | 3.261020  | H | 4.775951 | -1.632651 | -2.523311 |
| C    | -5.948013 | 0.005707  | 0.244002  | C | 1.960953  | 4.116154  | 1.535329  | B | 4.325581 | -0.338513 | -0.329750 |
| H    | -6.854843 | 0.528329  | -0.046850 | H | 1.763917  | 5.135133  | 1.853673  | H | 5.120846 | 0.534704  | -0.386122 |
| C    | -6.002078 | -1.011828 | 1.195367  | C | 2.635153  | 3.871782  | 0.338238  | B | 3.752970 | -0.972464 | 1.220562  |
| H    | -6.952721 | -1.281691 | 1.644794  | H | 2.969797  | 4.698623  | -0.280230 | H | 4.145797 | -0.546040 | 2.251486  |
| C    | -4.840602 | -1.681101 | 1.571175  | C | 2.886432  | 2.563788  | -0.071688 | B | 4.585626 | -2.048209 | 0.073969  |
|      |           |           |           | H | 3.421229  | 2.393828  | -0.998302 | H | 5.676470 | -2.451984 | 0.310091  |

**Table S15** Cartesian coordinates of **1CB** at  $\Psi = 90^\circ$  in THF from B3LYP calculations (in Å).

| Atom | x         | y         | z         |   |           |           |           |   |           |           |           |
|------|-----------|-----------|-----------|---|-----------|-----------|-----------|---|-----------|-----------|-----------|
|      |           |           |           | H | 4.570424  | -1.703320 | -3.035830 | B | -2.102730 | -1.018733 | -1.172412 |
| C    | -2.711852 | 0.325750  | -0.320304 | C | 3.396538  | -1.089394 | -1.337886 | H | -1.302252 | -0.830305 | -2.006669 |
| C    | -1.650954 | -0.955508 | 0.507083  | C | 2.166760  | -1.668642 | -1.781149 | B | -2.124345 | -2.459067 | -0.111537 |
| C    | -0.247231 | -0.590796 | 0.934893  | H | 2.165475  | -2.241977 | -2.704014 | H | -1.283275 | -3.281673 | -0.225986 |
| C    | -0.110295 | -0.076181 | 2.237942  | C | 1.012775  | -1.538596 | -1.069319 | B | -2.675978 | -1.896624 | 1.479122  |
| H    | -0.983287 | 0.003599  | 2.869556  | H | 0.137153  | -2.042166 | -1.439929 | H | -2.213707 | -2.309597 | 2.486305  |
| C    | 1.097778  | 0.365143  | 2.748356  | C | 0.943869  | -0.803740 | 0.168260  | B | -2.964888 | -0.146596 | 1.315522  |
| H    | 1.140721  | 0.773061  | 3.753607  | C | 2.193420  | -0.303533 | 0.683997  | H | -2.738697 | 0.625001  | 2.171578  |
| C    | 2.261707  | 0.308331  | 1.972990  | C | 3.400604  | -0.424123 | -0.077561 | B | -3.432630 | -2.186399 | -1.279715 |
| C    | 3.510273  | 0.826500  | 2.456399  | C | -2.138269 | 1.688283  | -0.591969 | H | -3.543168 | -2.888667 | -2.229580 |
| H    | 3.526376  | 1.291675  | 3.437688  | C | -1.472237 | 1.962902  | -1.797286 | B | -3.814122 | -2.714435 | 0.382231  |
| C    | 4.643287  | 0.743934  | 1.708646  | H | -1.342475 | 1.183760  | -2.537667 | H | -4.204864 | -3.807324 | 0.631179  |
| H    | 5.581739  | 1.145783  | 2.080073  | C | -0.980389 | 3.239868  | -2.062014 | B | -4.328056 | -1.272952 | 1.299033  |
| C    | 4.630206  | 0.111292  | 0.420366  | H | -0.468271 | 3.430143  | -2.999917 | H | -5.085778 | -1.313045 | 2.211217  |
| C    | 5.795129  | -0.003359 | -0.355882 | C | -1.147564 | 4.266068  | -1.131414 | B | -4.318305 | 0.111561  | 0.192339  |
| H    | 6.723544  | 0.412789  | 0.024908  | H | -0.763214 | 5.259963  | -1.338702 | H | -4.968535 | 1.090859  | 0.323789  |
| C    | 5.772183  | -0.644720 | -1.593432 | C | -1.819166 | 4.007621  | 0.064174  | B | -3.772235 | -0.449491 | -1.393696 |
| H    | 6.684018  | -0.725694 | -2.176950 | H | -1.964857 | 4.799546  | 0.792038  | H | -4.030260 | 0.128261  | -2.393085 |
| C    | 4.586248  | -1.190103 | -2.078532 | C | -2.311456 | 2.731682  | 0.332132  | B | -4.821973 | -1.487717 | -0.402944 |
|      |           |           |           | H | -2.841058 | 2.553997  | 1.259794  | H | -5.947623 | -1.684472 | -0.724070 |



**Table S16** Cartesian coordinates of **1CB** at  $\Psi = 112.5^\circ$  in THF from B3LYP calculations (in Å).

| Atom | x         | y         | z         |   |           |           |           |   |           |           |           |
|------|-----------|-----------|-----------|---|-----------|-----------|-----------|---|-----------|-----------|-----------|
|      |           |           |           | H | 4.348968  | 2.288843  | -2.508547 | B | -2.299171 | -0.018171 | -1.548909 |
| C    | -2.695576 | 0.430280  | 0.075514  | C | 3.278411  | 0.876214  | -1.285856 | H | -1.598205 | 0.655451  | -2.198078 |
| C    | -1.710273 | -1.001668 | -0.242697 | C | 1.969080  | 1.303182  | -1.666117 | B | -2.336275 | -1.782681 | -1.653041 |
| C    | -0.257644 | -1.110468 | 0.229505  | H | 1.873580  | 2.144543  | -2.346893 | H | -1.551941 | -2.329055 | -2.349559 |
| C    | -0.044644 | -2.079640 | 1.229574  | C | 0.848144  | 0.697920  | -1.185596 | B | -2.725412 | -2.387662 | -0.040406 |
| H    | -0.891243 | -2.587556 | 1.665953  | H | -0.101472 | 1.101434  | -1.480260 | H | -2.241243 | -3.385424 | 0.359021  |
| C    | 1.211255  | -2.441144 | 1.682511  | C | 0.888584  | -0.414945 | -0.274696 | B | -2.888193 | -0.979856 | 1.039036  |
| H    | 1.305423  | -3.205284 | 2.448060  | C | 2.200662  | -0.815160 | 0.177017  | H | -2.498206 | -0.984851 | 2.148380  |
| C    | 2.359561  | -1.846473 | 1.151170  | C | 3.379524  | -0.183945 | -0.338982 | B | -3.725429 | -0.816733 | -2.201888 |
| C    | 3.672214  | -2.244945 | 1.574577  | C | -2.038955 | 1.658473  | 0.654815  | H | -3.973189 | -0.712552 | -3.357421 |
| H    | 3.753114  | -3.035322 | 2.315066  | C | -1.902979 | 2.810650  | -0.137150 | B | -4.001609 | -2.291581 | -1.254144 |
| C    | 4.785092  | -1.655281 | 1.062795  | H | -2.251101 | 2.808329  | -1.163366 | H | -4.449233 | -3.285397 | -1.724043 |
| H    | 5.774912  | -1.966323 | 1.384723  | C | -1.328830 | 3.968207  | 0.384177  | B | -4.328943 | -1.804549 | 0.432128  |
| C    | 4.678111  | -0.604062 | 0.091695  | H | -1.237074 | 4.848292  | -0.244434 | H | -5.002616 | -2.436522 | 1.176714  |
| C    | 5.816955  | 0.022754  | -0.440014 | C | -0.874597 | 3.994734  | 1.703528  | B | -4.292931 | -0.035831 | 0.508225  |
| H    | 6.798784  | -0.306239 | -0.111520 | H | -0.425466 | 4.895902  | 2.109219  | H | -4.842275 | 0.642918  | 1.306011  |
| C    | 5.700478  | 1.052773  | -1.372038 | C | -1.003636 | 2.855292  | 2.497466  | B | -3.918162 | 0.568706  | -1.110296 |
| H    | 6.593207  | 1.525347  | -1.769841 | H | -0.656005 | 2.863076  | 3.525670  | H | -4.227183 | 1.658636  | -1.445780 |
| C    | 4.442836  | 1.480230  | -1.789205 | C | -1.583401 | 1.696702  | 1.980783  | B | -4.970866 | -0.843281 | -0.923836 |
|      |           |           |           | H | -1.679059 | 0.827198  | 2.617740  | H | -6.129770 | -0.765327 | -1.167802 |

**Table S17** Cartesian coordinates of **1CB** at  $\Psi = 135^\circ$  in THF from B3LYP calculations (in Å).

| Atom | x         | y         | z         |   |           |           |           |   |           |           |           |
|------|-----------|-----------|-----------|---|-----------|-----------|-----------|---|-----------|-----------|-----------|
|      |           |           |           | H | 4.193298  | 2.680878  | -1.994425 | B | -2.274533 | -0.134569 | -1.532649 |
| C    | -2.611876 | 0.477285  | 0.059732  | C | 3.179152  | 1.040234  | -1.037470 | H | -1.483666 | 0.392596  | -2.218310 |
| C    | -1.772826 | -1.041634 | -0.133747 | C | 1.854039  | 1.498584  | -1.309284 | B | -2.481715 | -1.889702 | -1.472587 |
| C    | -0.290706 | -1.234162 | 0.224253  | H | 1.726358  | 2.439142  | -1.837932 | H | -1.752030 | -2.564116 | -2.113802 |
| C    | -0.025360 | -2.413411 | 0.944264  | C | 0.755672  | 0.797714  | -0.915820 | B | -2.911581 | -2.317623 | 0.186872  |
| H    | -0.848865 | -3.013831 | 1.296166  | H | -0.202734 | 1.225150  | -1.136228 | H | -2.554437 | -3.328255 | 0.672431  |
| C    | 1.250867  | -2.850961 | 1.249886  | C | 0.832531  | -0.451872 | -0.204903 | B | -2.924204 | -0.828643 | 1.150129  |
| H    | 1.380615  | -3.770147 | 1.813051  | C | 2.165210  | -0.917938 | 0.104898  | H | -2.516924 | -0.778743 | 2.253106  |
| C    | 2.371399  | -2.129414 | 0.831758  | C | 3.320970  | -0.179407 | -0.314711 | B | -3.779449 | -0.852077 | -2.103983 |
| C    | 3.701962  | -2.583258 | 1.123980  | C | -1.894962 | 1.698176  | 0.593290  | H | -4.031375 | -0.823406 | -3.262888 |
| H    | 3.815743  | -3.509540 | 1.679594  | C | -1.929124 | 2.898556  | -0.135010 | B | -4.179455 | -2.208569 | -1.033129 |
| C    | 4.790238  | -1.878058 | 0.717587  | H | -2.440162 | 2.942185  | -1.088536 | H | -4.717457 | -3.195051 | -1.415352 |
| H    | 5.793858  | -2.228711 | 0.941028  | C | -1.304524 | 4.044553  | 0.353654  | B | -4.445503 | -1.555541 | 0.608277  |
| C    | 4.638017  | -0.653638 | -0.015162 | H | -1.347101 | 4.961918  | -0.224984 | H | -5.167072 | -2.059515 | 1.403715  |
| C    | 5.752104  | 0.086828  | -0.442983 | C | -0.628888 | 4.012431  | 1.574128  | B | -4.241223 | 0.198267  | 0.534958  |
| H    | 6.747379  | -0.283034 | -0.213313 | H | -0.140692 | 4.904661  | 1.953486  | H | -4.716831 | 0.995333  | 1.267752  |
| C    | 5.594718  | 1.277075  | -1.151058 | C | -0.585191 | 2.823468  | 2.301739  | B | -3.829608 | 0.627421  | -1.133780 |
| H    | 6.468896  | 1.834843  | -1.472448 | H | -0.061117 | 2.782303  | 3.251339  | H | -4.061015 | 1.702352  | -1.562461 |
| C    | 4.319663  | 1.752107  | -1.445339 | C | -1.214952 | 1.676349  | 1.819622  | B | -5.007538 | -0.655342 | -0.821543 |
|      |           |           |           | H | -1.162495 | 0.766159  | 2.402166  | H | -6.156922 | -0.488920 | -1.065798 |

**Table S18** Cartesian coordinates of **1CB** at  $\Psi = 157.5^\circ$  in THF from B3LYP calculations (in Å).

| Atom | x         | y         | z         |   |           |           |           |   |           |           |           |
|------|-----------|-----------|-----------|---|-----------|-----------|-----------|---|-----------|-----------|-----------|
|      |           |           |           | H | 4.129570  | 2.929809  | -1.351159 | B | -2.414548 | -0.253084 | -1.470463 |
| C    | -2.545913 | 0.521464  | 0.076847  | C | 3.140297  | 1.114062  | -0.750524 | H | -1.663327 | 0.166481  | -2.272953 |
| C    | -1.790354 | -1.097072 | -0.085451 | C | 1.819561  | 1.529097  | -1.106507 | B | -2.707673 | -1.991430 | -1.231448 |
| C    | -0.288016 | -1.407219 | 0.033633  | H | 1.685993  | 2.498369  | -1.578451 | H | -2.101278 | -2.753943 | -1.901367 |
| C    | -0.004885 | -2.747018 | 0.362550  | C | 0.735377  | 0.737247  | -0.883223 | B | -2.937272 | -2.243066 | 0.509179  |
| H    | -0.815249 | -3.445868 | 0.493641  | H | -0.219736 | 1.097762  | -1.211890 | H | -2.562888 | -3.197902 | 1.087094  |
| C    | 1.278250  | -3.221510 | 0.574631  | C | 0.824847  | -0.560754 | -0.271178 | B | -2.750652 | -0.674638 | 1.304869  |
| H    | 1.423201  | -4.260627 | 0.854266  | C | 2.160364  | -1.042219 | -0.007169 | H | -2.207071 | -0.562370 | 2.342407  |
| C    | 2.383359  | -2.375670 | 0.448384  | C | 3.299660  | -0.198795 | -0.218982 | B | -4.018340 | -0.940625 | -1.797360 |
| C    | 3.715260  | -2.827704 | 0.737031  | C | -1.790419 | 1.786428  | 0.422363  | H | -4.413031 | -1.005104 | -2.914175 |
| H    | 3.845145  | -3.846436 | 1.090683  | C | -1.805548 | 2.868238  | -0.474356 | B | -4.343565 | -2.177179 | -0.559787 |
| C    | 4.785925  | -2.005163 | 0.577729  | H | -2.303218 | 2.775074  | -1.431757 | H | -4.969464 | -3.161043 | -0.780839 |
| H    | 5.789863  | -2.351809 | 0.805980  | C | -1.175660 | 4.068195  | -0.151740 | B | -4.369170 | -1.363475 | 1.031204  |
| C    | 4.617128  | -0.666724 | 0.087076  | H | -1.202212 | 4.890716  | -0.859543 | H | -5.004072 | -1.754664 | 1.953686  |
| C    | 5.714543  | 0.187414  | -0.110774 | C | -0.517117 | 4.211485  | 1.070746  | B | -4.103424 | 0.356966  | 0.766237  |
| H    | 6.710571  | -0.172368 | 0.131448  | H | -0.026345 | 5.146524  | 1.322046  | H | -4.449892 | 1.236340  | 1.476595  |
| C    | 5.539837  | 1.474468  | -0.616633 | C | -0.496861 | 3.143250  | 1.966834  | B | -3.888534 | 0.615461  | -0.975386 |
| H    | 6.401376  | 2.118164  | -0.765279 | H | 0.011351  | 3.239488  | 2.921049  | H | -4.124588 | 1.659592  | -1.471903 |
| C    | 4.265681  | 1.932790  | -0.941822 | C | -1.130217 | 1.942074  | 1.649280  | B | -5.069795 | -0.571118 | -0.400667 |
|      |           |           |           | H | -1.098055 | 1.129031  | 2.362082  | H | -6.232362 | -0.362462 | -0.516023 |

**Table S19** Cartesian coordinates of **1CB** at  $\Psi = 180^\circ$  in THF from B3LYP calculations (in Å).

| Atom | x         | y         | z         |   |           |           |           |   |          |           |           |
|------|-----------|-----------|-----------|---|-----------|-----------|-----------|---|----------|-----------|-----------|
|      |           |           |           | H | -3.873898 | 3.462326  | -0.008594 | B | 2.393999 | -0.667831 | 1.313657  |
| C    | 2.770425  | 0.422860  | 0.001710  | C | -3.114936 | 1.446909  | -0.006788 | H | 1.796463 | -0.259827 | 2.247298  |
| C    | 1.491554  | -1.372288 | -0.001878 | C | -1.728254 | 1.801592  | -0.017066 | B | 2.389548 | -2.420556 | 0.898421  |
| C    | -0.026569 | -1.555158 | -0.005723 | H | -1.457885 | 2.853727  | -0.025518 | H | 1.790331 | -3.155477 | 1.603284  |
| C    | -0.445900 | -2.901744 | -0.007061 | C | -0.750376 | 0.854429  | -0.017895 | B | 2.393433 | -2.418940 | -0.900181 |
| H    | 0.292575  | -3.690710 | -0.008070 | H | 0.272953  | 1.178275  | -0.030029 | H | 1.797428 | -3.152698 | -1.608970 |
| C    | -1.780658 | -3.272875 | -0.004473 | C | -1.031603 | -0.551011 | -0.008158 | B | 2.400252 | -0.665734 | -1.313163 |
| H    | -2.039513 | -4.327583 | -0.004524 | C | -2.419592 | -0.934856 | -0.003136 | H | 1.806782 | -0.256190 | -2.248768 |
| C    | -2.795729 | -2.310211 | -0.000378 | C | -3.448799 | 0.059996  | -0.001317 | B | 3.901955 | -1.706708 | 1.435435  |
| C    | -4.185463 | -2.672187 | 0.005840  | C | 2.320974  | 1.840966  | 0.002907  | H | 4.360258 | -2.029646 | 2.480810  |
| H    | -4.441321 | -3.727875 | 0.008057  | C | 2.148722  | 2.533300  | 1.215221  | B | 3.900085 | -2.767982 | 0.002098  |
| C    | -5.158996 | -1.722345 | 0.009221  | H | 2.272701  | 2.012057  | 2.157267  | H | 4.341628 | -3.870051 | 0.002166  |
| H    | -6.207807 | -2.005562 | 0.014312  | C | 1.821197  | 3.886524  | 1.213656  | B | 3.908485 | -1.704485 | -1.429508 |
| C    | -4.826830 | -0.325211 | 0.005575  | H | 1.693457  | 4.408134  | 2.156686  | H | 4.371383 | -2.026088 | -2.473270 |
| C    | -5.818176 | 0.669899  | 0.008218  | C | 1.660121  | 4.569230  | 0.005275  | B | 4.053012 | -0.037526 | -0.900352 |
| H    | -6.862851 | 0.371723  | 0.013807  | H | 1.404243  | 5.624157  | 0.006226  | H | 4.537031 | 0.800839  | -1.579699 |
| C    | -5.476806 | 2.021433  | 0.003536  | C | 1.831754  | 3.891268  | -1.204345 | B | 4.048610 | -0.038863 | 0.909259  |
| H    | -6.258025 | 2.775405  | 0.005585  | H | 1.712316  | 4.416544  | -2.146428 | H | 4.529288 | 0.798602  | 1.592084  |
| C    | -4.138800 | 2.408751  | -0.004220 | C | 2.159541  | 2.538110  | -1.208243 | B | 4.899360 | -1.335915 | 0.005581  |
|      |           |           |           | H | 2.291830  | 2.020456  | -2.151169 | H | 6.086128 | -1.362120 | 0.008342  |

**Table S20** Cartesian coordinates of the ground state ( $S_0$ ) fully optimized geometry in THF of **2CB** from B3LYP calculations (in Å).

| Atom | x         | y         | z         |   |           |           |           |   |           |           |           |
|------|-----------|-----------|-----------|---|-----------|-----------|-----------|---|-----------|-----------|-----------|
|      |           |           |           | C | -3.786050 | -0.357232 | -2.459367 | B | 2.609086  | -2.307094 | 0.909016  |
| C    | 2.982443  | 0.343837  | -0.008269 | H | -4.330518 | -0.306351 | -3.398152 | H | 1.879432  | -2.999119 | 1.531298  |
| C    | 1.893592  | -1.045859 | 0.008994  | C | -2.434763 | -0.526280 | -2.457691 | B | 2.606406  | -2.326584 | -0.864839 |
| C    | 0.402520  | -0.822009 | 0.007952  | H | -1.889600 | -0.611741 | -3.393361 | H | 1.875080  | -3.032194 | -1.469607 |
| C    | -0.300904 | -0.728581 | 1.216333  | C | -1.695090 | -0.593950 | -1.225312 | B | 2.792283  | -0.645164 | -1.407430 |
| H    | 0.224243  | -0.797022 | 2.161042  | C | -2.406121 | -0.484733 | 0.006093  | H | 2.225158  | -0.212529 | -2.341639 |
| C    | -1.692399 | -0.558709 | 1.238575  | C | -3.820537 | -0.311359 | 0.005115  | B | 4.186145  | -1.702679 | 1.455125  |
| C    | -2.429518 | -0.456198 | 2.470067  | C | 2.408814  | 1.737405  | -0.019234 | H | 4.641579  | -2.046507 | 2.495186  |
| H    | -1.882386 | -0.515043 | 3.406630  | C | 2.194456  | 2.430498  | 1.182529  | B | 4.081316  | -2.765959 | 0.024663  |
| C    | -3.780863 | -0.287452 | 2.469805  | H | 2.421064  | 1.959654  | 2.130980  | H | 4.465281  | -3.888952 | 0.036518  |
| H    | -4.323371 | -0.210193 | 3.407931  | C | 1.701415  | 3.734264  | 1.172238  | B | 4.181968  | -1.734674 | -1.429304 |
| C    | -4.526799 | -0.208057 | 1.242052  | H | 1.542910  | 4.251804  | 2.113064  | H | 4.633808  | -2.101771 | -2.462951 |
| C    | -5.920299 | -0.035748 | 1.215752  | C | 1.417974  | 4.370281  | -0.036879 | B | 4.386407  | -0.054872 | -0.893000 |
| H    | -6.462658 | 0.043399  | 2.153675  | H | 1.033318  | 5.385385  | -0.043700 | H | 4.888166  | 0.815432  | -1.516987 |
| C    | -6.605837 | 0.032778  | 0.003136  | C | 1.641060  | 3.695246  | -1.237363 | B | 4.388888  | -0.035488 | 0.880529  |
| H    | -7.683358 | 0.166304  | 0.002343  | H | 1.435095  | 4.182221  | -2.185291 | H | 4.893377  | 0.847863  | 1.483541  |
| C    | -5.922801 | -0.069837 | -1.208481 | C | 2.134466  | 2.391471  | -1.230439 | B | 5.176456  | -1.368303 | 0.007502  |
| H    | -6.467107 | -0.017020 | -2.147134 | H | 2.313832  | 1.890452  | -2.173392 | H | 6.358754  | -1.472551 | 0.007085  |
| C    | -4.529382 | -0.243032 | -1.232783 | B | 2.796280  | -0.614023 | 1.413518  | C | -0.303610 | -0.763389 | -1.201105 |
|      |           |           |           | H | 2.231638  | -0.158143 | 2.338280  | H | 0.219495  | -0.859317 | -2.144556 |

**Table S21** Cartesian coordinates of the first singlet excited state ( $S_1$ ) fully optimized geometry in THF of **2CB** from B3LYP calculations (in Å).

| Atom | x         | y         | z         |   |           |           |           |   |           |           |           |
|------|-----------|-----------|-----------|---|-----------|-----------|-----------|---|-----------|-----------|-----------|
|      |           |           |           | C | -4.043601 | -0.065639 | -2.449675 | B | 2.206326  | -2.544302 | 0.891291  |
| C    | 3.329259  | 0.286220  | 0.000606  | H | -4.569139 | 0.056605  | -3.391137 | H | 1.464950  | -3.169036 | 1.580679  |
| C    | 1.559371  | -1.337551 | -0.001980 | C | -2.694841 | -0.376901 | -2.446663 | B | 2.207129  | -2.541410 | -0.898663 |
| C    | 0.105376  | -1.013824 | -0.001719 | H | -2.164875 | -0.497400 | -3.385807 | H | 1.465875  | -3.163544 | -1.590558 |
| C    | -0.603544 | -0.864126 | 1.196131  | C | -1.986740 | -0.541214 | -1.227304 | B | 2.603675  | -0.740610 | -1.210947 |
| H    | -0.085664 | -0.990611 | 2.140556  | C | -2.687221 | -0.382283 | -0.000750 | H | 2.113742  | -0.208495 | -2.153882 |
| C    | -1.987448 | -0.548266 | 1.225352  | C | -4.066608 | -0.064580 | -0.000241 | B | 3.825389  | -2.099081 | 1.429661  |
| C    | -2.696231 | -0.390843 | 2.445255  | C | 3.127443  | 1.744196  | 0.002495  | H | 4.209967  | -2.514162 | 2.477863  |
| H    | -2.166840 | -0.516737 | 3.384006  | C | 3.031832  | 2.465239  | 1.210762  | B | 3.606880  | -3.165003 | -0.003954 |
| C    | -4.044967 | -0.079468 | 2.449217  | H | 3.107427  | 1.933730  | 2.153322  | H | 3.853511  | -4.330744 | -0.005279 |
| H    | -4.571003 | 0.037516  | 3.391069  | C | 2.850508  | 3.846222  | 1.210637  | B | 3.826558  | -2.094998 | -1.434340 |
| C    | -4.759439 | 0.091070  | 1.233887  | H | 2.784439  | 4.377224  | 2.156132  | H | 4.211908  | -2.507198 | -2.483396 |
| C    | -6.143120 | 0.411312  | 1.207618  | C | 2.756384  | 4.548309  | 0.005746  | B | 4.418439  | -0.518757 | -0.901729 |
| H    | -6.671828 | 0.531030  | 2.147961  | H | 2.614206  | 5.624749  | 0.006922  | H | 5.124316  | 0.132853  | -1.601768 |
| C    | -6.820087 | 0.571337  | 0.000786  | C | 2.851437  | 3.849063  | -1.200725 | B | 4.417321  | -0.521370 | 0.902029  |
| H    | -7.876091 | 0.815391  | 0.001172  | H | 2.786057  | 4.382373  | -2.144972 | H | 5.122594  | 0.128271  | 1.604482  |
| C    | -6.142501 | 0.417909  | -1.206551 | C | 3.032704  | 2.468104  | -1.204078 | B | 4.904623  | -1.977974 | -0.001802 |
| H    | -6.670779 | 0.542620  | -2.146481 | H | 3.108878  | 1.938672  | -2.147756 | H | 6.045356  | -2.322678 | -0.002003 |
| C    | -4.758761 | 0.097993  | -1.233867 | B | 2.602930  | -0.744167 | 1.209274  | C | -0.602771 | -0.857138 | -1.199061 |
|      |           |           |           | H | 2.112320  | -0.214861 | 2.153391  | H | -0.084267 | -0.978056 | -2.143884 |

**Table S22** Cartesian coordinates of **2CB** at  $\Psi = 0^\circ$  in THF from B3LYP calculations (in Å).

| Atom | x         | y         | z         |   |           |           |           |   |           |           |           |
|------|-----------|-----------|-----------|---|-----------|-----------|-----------|---|-----------|-----------|-----------|
|      |           |           |           | C | -4.305683 | -2.523065 | -0.000008 | B | 2.299415  | -2.455799 | 0.887343  |
| C    | 2.995769  | 0.127289  | 0.000003  | H | -4.998418 | -3.360057 | -0.000004 | H | 1.496376  | -3.058032 | 1.510601  |
| C    | 1.742617  | -1.104988 | -0.000006 | C | -2.961867 | -2.744495 | -0.000008 | B | 2.299464  | -2.455825 | -0.887370 |
| C    | 0.260139  | -0.778179 | -0.000011 | H | -2.571162 | -3.758075 | -0.000006 | H | 1.496401  | -3.058015 | -1.510635 |
| C    | -0.244055 | 0.526927  | -0.000010 | C | -2.027714 | -1.649557 | -0.000014 | B | 2.681217  | -0.805645 | -1.420551 |
| H    | 0.419103  | 1.377785  | 0.000011  | C | -2.536837 | -0.318430 | -0.000017 | H | 2.137959  | -0.296189 | -2.333457 |
| C    | -1.625679 | 0.775889  | -0.000010 | C | -3.942488 | -0.085318 | -0.000012 | B | 3.933020  | -2.065273 | 1.444709  |
| C    | -2.155855 | 2.113568  | -0.000003 | C | 2.727460  | 1.614337  | -0.000003 | H | 4.336601  | -2.479354 | 2.480426  |
| H    | -1.457901 | 2.946051  | 0.000000  | C | 2.643817  | 2.324038  | 1.208032  | B | 3.697472  | -3.091001 | 0.000020  |
| C    | -3.499359 | 2.338732  | -0.000006 | H | 2.727545  | 1.802251  | 2.153350  | H | 3.931440  | -4.254510 | 0.000023  |
| H    | -3.884468 | 3.354707  | -0.000002 | C | 2.449763  | 3.704493  | 1.205964  | B | 3.933083  | -2.065277 | -1.444671 |
| C    | -4.442405 | 1.252136  | -0.000008 | H | 2.383463  | 4.234867  | 2.150556  | H | 4.336759  | -2.479359 | -2.480349 |
| C    | -5.832017 | 1.456952  | -0.000003 | C | 2.345970  | 4.399478  | 0.000014  | B | 4.340192  | -0.438933 | -0.889370 |
| H    | -6.218420 | 2.472288  | -0.000001 | H | 2.194073  | 5.474272  | 0.000021  | H | 4.952984  | 0.373406  | -1.491097 |
| C    | -6.710477 | 0.373833  | -0.000003 | C | 2.449998  | 3.704544  | -1.205943 | B | 4.340230  | -0.438956 | 0.889441  |
| H    | -7.781669 | 0.551356  | 0.000001  | H | 2.383887  | 4.234962  | -2.150525 | H | 4.952950  | 0.373426  | 1.491183  |
| C    | -6.228443 | -0.935185 | -0.000005 | C | 2.644051  | 2.324090  | -1.208028 | B | 4.959608  | -1.845687 | 0.000042  |
| H    | -6.921973 | -1.771400 | -0.000004 | H | 2.727972  | 1.802348  | -2.153351 | H | 6.120509  | -2.092209 | 0.000050  |
| C    | -4.847456 | -1.189784 | -0.000009 | B | 2.681193  | -0.805579 | 1.420500  | C | -0.641189 | -1.854208 | -0.000017 |
|      |           |           |           | H | 2.137832  | -0.296212 | 2.333397  | H | -0.274668 | -2.873008 | 0.000006  |

**Table S23** Cartesian coordinates of **2CB** at  $\Psi = 22.5^\circ$  in THF from B3LYP calculations (in Å).

| Atom | x         | y         | z         |   |           |           |           |  |   |           |           |           |
|------|-----------|-----------|-----------|---|-----------|-----------|-----------|--|---|-----------|-----------|-----------|
|      |           |           |           | C | -4.226401 | -2.503864 | 0.588438  |  | B | 2.429612  | -2.528993 | 0.580123  |
| C    | 2.978694  | 0.183221  | 0.063273  | H | -4.905347 | -3.313425 | 0.841592  |  | H | 1.689834  | -3.271549 | 1.121827  |
| C    | 1.794916  | -1.100857 | -0.111882 | C | -2.881364 | -2.717038 | 0.569253  |  | B | 2.414794  | -2.289772 | -1.177185 |
| C    | 0.305458  | -0.814188 | -0.108468 | H | -2.476204 | -3.696503 | 0.806976  |  | H | 1.627821  | -2.840773 | -1.866697 |
| C    | -0.218032 | 0.444707  | -0.426302 | C | -1.964971 | -1.657827 | 0.238217  |  | B | 2.711560  | -0.562552 | -1.473918 |
| H    | 0.432189  | 1.258953  | -0.710177 | C | -2.493203 | -0.371834 | -0.075363 |  | H | 2.142721  | 0.050354  | -2.304408 |
| C    | -1.600417 | 0.685481  | -0.413029 | C | -3.900322 | -0.147966 | -0.058171 |  | B | 4.040483  | -2.131959 | 1.191718  |
| C    | -2.150516 | 1.976028  | -0.733041 | C | 2.605586  | 1.633690  | 0.263520  |  | H | 4.467275  | -2.666186 | 2.160946  |
| H    | -1.466647 | 2.780694  | -0.987842 | C | 2.243045  | 2.128097  | 1.524700  |  | B | 3.853482  | -2.960495 | -0.382737 |
| C    | -3.495172 | 2.192728  | -0.714233 | H | 2.188185  | 1.463513  | 2.377273  |  | H | 4.149797  | -4.099205 | -0.537622 |
| H    | -3.895042 | 3.173490  | -0.956520 | C | 1.949547  | 3.480516  | 1.697280  |  | B | 4.026621  | -1.736168 | -1.669698 |
| C    | -4.419978 | 1.143191  | -0.377350 | H | 1.667632  | 3.842637  | 2.680840  |  | H | 4.451115  | -1.976166 | -2.751059 |
| C    | -5.810446 | 1.340103  | -0.351908 | C | 2.020247  | 4.361392  | 0.617903  |  | B | 4.347714  | -0.181780 | -0.890076 |
| H    | -6.212079 | 2.320194  | -0.593495 | H | 1.791226  | 5.413567  | 0.754794  |  | H | 4.919864  | 0.731752  | -1.374315 |
| C    | -6.671039 | 0.293507  | -0.021733 | C | 2.396018  | 3.881372  | -0.638030 |  | B | 4.357938  | -0.424158 | 0.871123  |
| H    | -7.743220 | 0.464325  | -0.007333 | H | 2.465431  | 4.557430  | -1.484294 |  | H | 4.926264  | 0.331286  | 1.581355  |
| C    | -6.169949 | -0.970581 | 0.289063  | C | 2.689543  | 2.530423  | -0.814479 |  | B | 5.046615  | -1.660777 | -0.204484 |
| H    | -6.849826 | -1.778858 | 0.543334  | H | 2.982588  | 2.175503  | -1.795269 |  | H | 6.218923  | -1.842898 | -0.236045 |
| C    | -4.787222 | -1.215657 | 0.277116  | B | 2.723145  | -0.953093 | 1.340227  |  | C | -0.576826 | -1.853503 | 0.220641  |
|      |           |           |           | H | 2.160390  | -0.618344 | 2.318649  |  | H | -0.195877 | -2.837894 | 0.459541  |



**Table S24** Cartesian coordinates of **2CB** at  $\Psi = 45^\circ$  in THF from B3LYP calculations (in Å).

| Atom | x         | y         | z         |   |           |           |           |   |           |           |           |
|------|-----------|-----------|-----------|---|-----------|-----------|-----------|---|-----------|-----------|-----------|
|      |           |           |           | C | -4.036314 | -2.367925 | 1.128965  | B | 2.593573  | -2.515913 | 0.257959  |
| C    | 2.951550  | 0.274275  | 0.135173  | H | -4.673040 | -3.098231 | 1.620529  | H | 1.889306  | -3.383508 | 0.636984  |
| C    | 1.885903  | -1.049842 | -0.264272 | C | -2.687059 | -2.548870 | 1.090395  | B | 2.637452  | -2.042669 | -1.448118 |
| C    | 0.389246  | -0.827656 | -0.251652 | H | -2.235720 | -3.423486 | 1.550092  | H | 1.925352  | -2.551404 | -2.243574 |
| C    | -0.190419 | 0.307446  | -0.832613 | C | -1.826628 | -1.593938 | 0.443264  | B | 2.818878  | -0.279647 | -1.497993 |
| H    | 0.422713  | 1.046192  | -1.330662 | C | -2.414313 | -0.443822 | -0.160289 | H | 2.263817  | 0.399069  | -2.283349 |
| C    | -1.577312 | 0.515134  | -0.801513 | C | -3.825893 | -0.252964 | -0.119583 | B | 4.141079  | -2.091101 | 1.007248  |
| C    | -2.188112 | 1.671765  | -1.401149 | C | 2.403869  | 1.637966  | 0.481129  | H | 4.565428  | -2.719236 | 1.919637  |
| H    | -1.546969 | 2.401599  | -1.887114 | C | 1.854686  | 1.912252  | 1.742019  | B | 4.089734  | -2.709252 | -0.670361 |
| C    | -3.537270 | 1.854597  | -1.364332 | H | 1.783418  | 1.132414  | 2.489072  | H | 4.481234  | -3.792646 | -0.955760 |
| H    | -3.983745 | 2.732683  | -1.822654 | C | 1.395730  | 3.192289  | 2.051634  | B | 4.224536  | -1.314829 | -1.772345 |
| C    | -4.406314 | 0.902944  | -0.724675 | H | 0.971894  | 3.382680  | 3.032527  | H | 4.714586  | -1.372761 | -2.851081 |
| C    | -5.799925 | 1.069125  | -0.672170 | C | 1.483129  | 4.219871  | 1.112436  | B | 4.387854  | 0.142243  | -0.777332 |
| H    | -6.246940 | 1.946648  | -1.130784 | H | 1.126205  | 5.215581  | 1.356425  | H | 4.909761  | 1.149344  | -1.108822 |
| C    | -6.605740 | 0.122576  | -0.039947 | C | 2.037853  | 3.959529  | -0.141599 | B | 4.339821  | -0.333177 | 0.933459  |
| H    | -7.681358 | 0.267686  | -0.009388 | H | 2.118965  | 4.751247  | -0.879651 | H | 4.816019  | 0.356588  | 1.767715  |
| C    | -6.045252 | -1.008094 | 0.554066  | C | 2.495112  | 2.681058  | -0.455114 | B | 5.168756  | -1.362641 | -0.256292 |
| H    | -6.682376 | -1.738740 | 1.044364  | H | 2.928369  | 2.498653  | -1.431359 | H | 6.351836  | -1.456422 | -0.249292 |
| C    | -4.656869 | -1.217460 | 0.527355  | B | 2.736382  | -1.041265 | 1.238152  | C | -0.435251 | -1.758253 | 0.395965  |
|      |           |           |           | H | 2.108964  | -0.884574 | 2.221579  | H | -0.004495 | -2.630151 | 0.871722  |

**Table S25** Cartesian coordinates of **2CB** at  $\Psi = 67.5^\circ$  in THF from B3LYP calculations (in Å).

| Atom | x         | y         | z         |   |           |           |           |   |           |           |           |
|------|-----------|-----------|-----------|---|-----------|-----------|-----------|---|-----------|-----------|-----------|
|      |           |           |           | C | -3.890150 | -1.942518 | 1.704666  | B | 2.614249  | -2.485945 | 0.127459  |
| C    | 2.960582  | 0.313447  | 0.152918  | H | -4.479555 | -2.504772 | 2.423570  | H | 1.888552  | -3.362288 | 0.445561  |
| C    | 1.909670  | -1.001014 | -0.336084 | C | -2.538616 | -2.100693 | 1.651762  | B | 2.686892  | -1.926769 | -1.551810 |
| C    | 0.414630  | -0.794946 | -0.297825 | H | -2.038286 | -2.789552 | 2.326361  | H | 1.994469  | -2.398687 | -2.386402 |
| C    | -0.227745 | 0.097568  | -1.164805 | C | -1.740215 | -1.365979 | 0.706484  | B | 2.858301  | -0.162516 | -1.505440 |
| H    | 0.340694  | 0.662506  | -1.891892 | C | -2.392218 | -0.460420 | -0.181752 | H | 2.332186  | 0.553589  | -2.275000 |
| C    | -1.618275 | 0.277734  | -1.124567 | C | -3.806492 | -0.294134 | -0.126548 | B | 4.148794  | -2.087919 | 0.924088  |
| C    | -2.294888 | 1.187151  | -2.010737 | C | 2.364495  | 1.640682  | 0.549223  | H | 4.563092  | -2.755956 | 1.812553  |
| H    | -1.702020 | 1.747564  | -2.727930 | C | 1.881707  | 1.864450  | 1.847403  | B | 4.131062  | -2.622302 | -0.781250 |
| C    | -3.646457 | 1.346506  | -1.959043 | H | 1.908063  | 1.072005  | 2.584239  | H | 4.537604  | -3.686217 | -1.115036 |
| H    | -4.142778 | 2.036757  | -2.635493 | C | 1.370246  | 3.110249  | 2.208696  | B | 4.273624  | -1.172544 | -1.809660 |
| C    | -4.452646 | 0.614799  | -1.018587 | H | 1.000200  | 3.261613  | 3.217776  | H | 4.781546  | -1.172968 | -2.881690 |
| C    | -5.847557 | 0.761238  | -0.945799 | C | 1.338030  | 4.154455  | 1.284163  | B | 4.411293  | 0.237505  | -0.740499 |
| H    | -6.344446 | 1.451027  | -1.622153 | H | 0.940003  | 5.123764  | 1.567818  | H | 4.925506  | 1.265525  | -1.016970 |
| C    | -6.591820 | 0.032382  | -0.018597 | C | 1.828139  | 3.945997  | -0.005632 | B | 4.338385  | -0.324700 | 0.941509  |
| H    | -7.669457 | 0.158415  | 0.022965  | H | 1.818026  | 4.752413  | -0.732091 | H | 4.794985  | 0.321175  | 1.820760  |
| C    | -5.967218 | -0.856635 | 0.855948  | C | 2.337791  | 2.701257  | -0.370643 | B | 5.193559  | -1.289608 | -0.283185 |
| H    | -6.556896 | -1.419274 | 1.574188  | H | 2.724628  | 2.561680  | -1.372849 | H | 6.376925  | -1.377853 | -0.261355 |
| C    | -4.574941 | -1.036732 | 0.820880  | B | 2.737165  | -1.057377 | 1.178061  | C | -0.348045 | -1.510487 | 0.636138  |
|      |           |           |           | H | 2.097388  | -0.948642 | 2.159416  | H | 0.134916  | -2.197086 | 1.321303  |

**Table S26** Cartesian coordinates of **2CB** at  $\Psi = 90^\circ$  in THF from B3LYP calculations (in Å).

| Atom | x         | y         | z         |   |           |           |           |   |           |           |           |
|------|-----------|-----------|-----------|---|-----------|-----------|-----------|---|-----------|-----------|-----------|
|      |           |           |           | C | -3.791835 | -0.494458 | 2.441559  | B | 2.604036  | -2.353325 | 0.789078  |
| C    | 2.982179  | 0.343660  | 0.022353  | H | -4.338569 | -0.495733 | 3.380393  | H | 1.871195  | -3.079009 | 1.367598  |
| C    | 1.893929  | -1.044985 | -0.044521 | C | -2.440595 | -0.663682 | 2.433805  | B | 2.612868  | -2.276028 | -0.983148 |
| C    | 0.402751  | -0.822007 | -0.037735 | H | -1.897805 | -0.801181 | 3.364648  | H | 1.885137  | -2.946919 | -1.630358 |
| C    | -0.297514 | -0.661024 | -1.240711 | C | -1.697899 | -0.662838 | 1.201375  | B | 2.801319  | -0.567399 | -1.430755 |
| H    | 0.229880  | -0.676570 | -2.186500 | C | -2.405834 | -0.484824 | -0.023801 | H | 2.241486  | -0.080985 | -2.342806 |
| C    | -1.689025 | -0.489879 | -1.256698 | C | -3.820240 | -0.311318 | -0.016617 | B | 4.177213  | -1.780089 | 1.378799  |
| C    | -2.423132 | -0.318619 | -2.482309 | C | 2.408039  | 1.736064  | 0.075627  | H | 4.625317  | -2.181176 | 2.401388  |
| H    | -1.873728 | -0.325169 | -3.419356 | C | 2.121687  | 2.348768  | 1.305488  | B | 4.082140  | -2.763320 | -0.108664 |
| C    | -3.774483 | -0.149956 | -2.475992 | H | 2.292079  | 1.816281  | 2.232671  | H | 4.466541  | -3.885248 | -0.155534 |
| H    | -4.314636 | -0.020405 | -3.409713 | C | 1.627774  | 3.651565  | 1.351702  | B | 4.191828  | -1.653708 | -1.502992 |
| C    | -4.523460 | -0.139006 | -1.247579 | H | 1.412365  | 4.106124  | 2.313528  | H | 4.651372  | -1.962715 | -2.552130 |
| C    | -5.917004 | 0.031999  | -1.215071 | C | 1.416240  | 4.366890  | 0.172667  | B | 4.391781  | -0.006260 | -0.873139 |
| H    | -6.457086 | 0.163460  | -2.148422 | H | 1.031185  | 5.381179  | 0.210075  | H | 4.898392  | 0.896250  | -1.445196 |
| C    | -6.605488 | 0.033092  | -0.002195 | C | 1.711792  | 3.772219  | -1.054461 | B | 4.383131  | -0.083556 | 0.898835  |
| H    | -7.682988 | 0.166670  | 0.003413  | H | 1.562443  | 4.321369  | -1.978724 | H | 4.882400  | 0.766032  | 1.552669  |
| C    | -5.925427 | -0.137049 | 1.203482  | C | 2.205229  | 2.469521  | -1.104005 | B | 5.176744  | -1.366690 | -0.041572 |
| H    | -6.471974 | -0.136384 | 2.142333  | H | 2.441534  | 2.031118  | -2.065522 | H | 6.359068  | -1.470654 | -0.040475 |
| C    | -4.532118 | -0.311848 | 1.221438  | B | 2.787358  | -0.690647 | 1.387817  | C | -0.306452 | -0.830941 | 1.171016  |
|      |           |           |           | H | 2.215025  | -0.289711 | 2.332996  | H | 0.214600  | -0.979576 | 2.108823  |

**Table S27** Cartesian coordinates of the ground state ( $S_0$ ) fully optimized geometry in THF of **4CB** from B3LYP calculations (in Å).

| Atom | x         | y         | z         |   |           |           |           |   |           |           |           |
|------|-----------|-----------|-----------|---|-----------|-----------|-----------|---|-----------|-----------|-----------|
|      |           |           |           | H | 0.058493  | 0.911177  | -2.142836 | B | 2.263486  | -1.253900 | -2.093527 |
| C    | 2.535330  | 0.414958  | 0.195682  | C | -0.054072 | -0.570266 | -0.620181 | H | 1.587162  | -1.477907 | -3.037373 |
| C    | 1.450587  | -0.772861 | -0.669326 | C | -0.968686 | -1.327374 | 0.248115  | B | 2.405731  | 0.419861  | -1.518393 |
| C    | -2.848845 | -2.694710 | 1.909961  | C | -2.364975 | -0.967721 | 0.239073  | H | 1.894422  | 1.331304  | -2.052274 |
| H    | -3.558301 | -3.210206 | 2.550763  | C | -2.863642 | 0.054411  | -0.622425 | B | 3.761014  | -2.087645 | 0.217611  |
| C    | -3.295525 | -1.650785 | 1.087997  | C | 1.915257  | 1.548705  | 0.965911  | H | 4.196819  | -2.973757 | 0.875041  |
| C    | -4.681033 | -1.264870 | 1.074500  | C | 1.543863  | 1.392119  | 2.310716  | B | 3.737124  | -2.106919 | -1.569219 |
| H    | -5.360687 | -1.791817 | 1.738278  | H | 1.678307  | 0.439080  | 2.806230  | H | 4.159340  | -3.019528 | -2.199870 |
| C    | -5.141302 | -0.280507 | 0.257236  | C | 1.008024  | 2.460372  | 3.028022  | B | 3.832901  | -0.419542 | -2.127806 |
| H    | -6.192206 | -0.005718 | 0.256414  | H | 0.726683  | 2.317304  | 4.066518  | H | 4.317978  | -0.095986 | -3.161037 |
| C    | -4.248356 | 0.407499  | -0.630957 | C | 0.838279  | 3.704095  | 2.418591  | B | 3.968483  | 0.622211  | -0.700728 |
| C    | -4.690978 | 1.406942  | -1.513397 | H | 0.420582  | 4.534886  | 2.978747  | H | 4.449925  | 1.702274  | -0.685749 |
| H    | -5.743928 | 1.674323  | -1.519121 | C | 1.216754  | 3.874457  | 1.086441  | B | 3.925376  | -0.400750 | 0.742283  |
| C    | -3.803883 | 2.048046  | -2.377339 | H | 1.099527  | 4.839357  | 0.603383  | H | 4.378406  | -0.046707 | 1.775845  |
| H    | -4.168559 | 2.815077  | -3.053366 | C | 1.751361  | 2.807865  | 0.366011  | B | 4.780594  | -0.958755 | -0.713713 |
| C    | -2.453123 | 1.709035  | -2.376816 | H | 2.051605  | 2.963470  | -0.662805 | H | 5.965454  | -1.026719 | -0.726651 |
| H    | -1.761402 | 2.209469  | -3.048218 | B | 2.332958  | -1.189340 | 0.760277  | C | -0.597142 | -2.406715 | 1.070575  |
| C    | -1.969774 | 0.719170  | -1.504193 | H | 1.754113  | -1.361850 | 1.765513  | H | 0.418235  | -2.761153 | 1.083068  |
| C    | -0.585594 | 0.372544  | -1.463157 | B | 2.228133  | -2.283492 | -0.653466 | C | -1.514337 | -3.072581 | 1.882753  |
|      |           |           |           | H | 1.549627  | -3.247985 | -0.607798 | H | -1.169729 | -3.898000 | 2.497954  |

**Table S28** Cartesian coordinates of the first singlet excited state ( $S_1$ ) fully optimized geometry in THF of **4CB** from B3LYP calculations (in Å).

| Atom | x         | y         | z         |   |           |           |           |   |           |           |           |
|------|-----------|-----------|-----------|---|-----------|-----------|-----------|---|-----------|-----------|-----------|
|      |           |           |           | H | 0.325225  | 0.021159  | 2.444334  | B | -1.626406 | -2.021487 | 1.778373  |
| C    | -2.901930 | 0.247914  | 0.017183  | C | 0.419888  | -0.765845 | 0.463923  | H | -0.855184 | -2.313465 | 2.634033  |
| C    | -1.025548 | -1.184240 | 0.501375  | C | 1.300567  | -1.000096 | -0.660129 | B | -2.135708 | -0.268516 | 1.486061  |
| C    | 3.062869  | -1.431077 | -2.866748 | C | 2.651422  | -0.529132 | -0.611592 | H | -1.689890 | 0.579171  | 2.183944  |
| H    | 3.737682  | -1.583683 | -3.702887 | C | 3.147316  | 0.149133  | 0.532734  | B | -3.266589 | -2.498078 | -0.520579 |
| C    | 3.529436  | -0.737098 | -1.721205 | C | -2.769803 | 1.628748  | -0.474439 | H | -3.627348 | -3.259000 | -1.362028 |
| C    | 4.859396  | -0.249012 | -1.662361 | C | -2.717550 | 1.907033  | -1.856226 | B | -2.989328 | -3.001632 | 1.181261  |
| H    | 5.512311  | -0.405969 | -2.514908 | H | -2.767008 | 1.088623  | -2.566092 | H | -3.158699 | -4.110531 | 1.580991  |
| C    | 5.331917  | 0.414125  | -0.543978 | C | -2.612548 | 3.215788  | -2.320029 | B | -3.274494 | -1.530913 | 2.169613  |
| H    | 6.355268  | 0.774649  | -0.518653 | H | -2.578610 | 3.403625  | -3.389371 | H | -3.622628 | -1.586501 | 3.306435  |
| C    | 4.494014  | 0.625607  | 0.579514  | C | -2.552360 | 4.283052  | -1.419538 | B | -3.951536 | -0.257867 | 1.152399  |
| C    | 4.954563  | 1.286565  | 1.744435  | H | -2.468416 | 5.302889  | -1.782562 | H | -4.683803 | 0.559299  | 1.607364  |
| H    | 5.977351  | 1.648794  | 1.776231  | C | -2.604332 | 4.024334  | -0.046639 | B | -3.940602 | -0.867744 | -0.546678 |
| C    | 4.109629  | 1.466989  | 2.835256  | H | -2.564430 | 4.845319  | 0.663516  | H | -4.670009 | -0.530638 | -1.421670 |
| H    | 4.472389  | 1.972635  | 3.723476  | C | -2.709785 | 2.717280  | 0.420857  | B | -4.352253 | -1.961641 | 0.804638  |
| C    | 2.796144  | 1.001716  | 2.791179  | H | -2.753935 | 2.530992  | 1.488359  | H | -5.472714 | -2.343166 | 0.936915  |
| H    | 2.140511  | 1.146937  | 3.644369  | B | -2.119672 | -1.084377 | -0.799759 | C | 0.902130  | -1.708293 | -1.835410 |
| C    | 2.291219  | 0.338861  | 1.644580  | H | -1.704284 | -0.858237 | -1.885550 | H | -0.094461 | -2.110528 | -1.897849 |
| C    | 0.953580  | -0.134862 | 1.576660  | B | -1.620999 | -2.657461 | 0.106687  | C | 1.763295  | -1.915395 | -2.908594 |
|      |           |           |           | H | -0.873601 | -3.476648 | -0.315959 | H | 1.411035  | -2.459722 | -3.777370 |

**Table S29** Cartesian coordinates of **4CB** at  $\Psi = 0^\circ$  in THF from B3LYP calculations (in Å).

| Atom | x         | y         | z         |   |           |           |           |   |           |           |           |
|------|-----------|-----------|-----------|---|-----------|-----------|-----------|---|-----------|-----------|-----------|
|      |           |           |           | H | 0.431665  | 1.406816  | 0.000419  | B | 1.525830  | -2.521979 | -0.895947 |
| C    | 2.661553  | -0.021476 | 0.000004  | C | -0.316113 | -0.580174 | -0.000084 | H | 0.699503  | -3.013665 | -1.579321 |
| C    | 1.085572  | -1.179331 | -0.000258 | C | -1.535686 | -1.404485 | -0.000247 | B | 2.122151  | -0.912681 | -1.375682 |
| C    | -3.985269 | -2.876800 | -0.000551 | C | -2.808573 | -0.725406 | -0.000140 | H | 1.668569  | -0.338483 | -2.300292 |
| H    | -4.913956 | -3.440026 | -0.000672 | C | -2.893633 | 0.698952  | 0.000158  | B | 3.196317  | -2.348434 | 1.440342  |
| C    | -4.029563 | -1.475914 | -0.000315 | C | 2.635066  | 1.480318  | -0.000275 | H | 3.530694  | -2.813365 | 2.479069  |
| C    | -5.288318 | -0.779895 | -0.000231 | C | 2.667848  | 2.194381  | 1.209172  | B | 2.828409  | -3.342888 | 0.000668  |
| H    | -6.196974 | -1.375425 | -0.000381 | H | 2.657855  | 1.663536  | 2.153460  | H | 2.899157  | -4.527629 | 0.000745  |
| C    | -5.355037 | 0.578094  | 0.000037  | C | 2.710757  | 3.587058  | 1.206471  | B | 3.196718  | -2.348901 | -1.439312 |
| H    | -6.314935 | 1.086625  | 0.000098  | H | 2.734030  | 4.122542  | 2.150161  | H | 3.531693  | -2.814166 | -2.477698 |
| C    | -4.156884 | 1.367796  | 0.000253  | C | 2.727167  | 4.288510  | -0.000865 | B | 3.845064  | -0.807449 | -0.890921 |
| C    | -4.184613 | 2.772229  | 0.000565  | H | 2.759573  | 5.373509  | -0.001094 | H | 4.562754  | -0.115817 | -1.526946 |
| H    | -5.145326 | 3.279508  | 0.000641  | C | 2.710240  | 3.586558  | -1.207902 | B | 3.844966  | -0.807285 | 0.891628  |
| C    | -3.003532 | 3.513152  | 0.000784  | H | 2.733091  | 4.121646  | -2.151826 | H | 4.562263  | -0.115065 | 1.527455  |
| H    | -3.047389 | 4.597913  | 0.001023  | C | 2.667370  | 2.193878  | -1.210011 | B | 4.248013  | -2.298228 | 0.000594  |
| C    | -1.768158 | 2.869409  | 0.000697  | H | 2.657020  | 1.662633  | -2.154077 | H | 5.360783  | -2.710784 | 0.000807  |
| H    | -0.848178 | 3.446906  | 0.000860  | B | 2.122037  | -0.912129 | 1.375876  | C | -1.566409 | -2.811534 | -0.000443 |
| C    | -1.698869 | 1.465996  | 0.000386  | H | 1.667468  | -0.337658 | 2.299829  | H | -0.653165 | -3.379776 | -0.000487 |
| C    | -0.444864 | 0.780579  | 0.000252  | B | 1.525494  | -2.521422 | 0.896454  | C | -2.761250 | -3.529482 | -0.000598 |
|      |           |           |           | H | 0.698614  | -3.012885 | 1.579331  | H | -2.722606 | -4.614394 | -0.000750 |

**Table S30** Cartesian coordinates of **4CB** at  $\Psi = 22.5^\circ$  in THF from B3LYP calculations (in Å).

| Atom | x         | y         | z         |   |           |           |           |   |           |           |           |
|------|-----------|-----------|-----------|---|-----------|-----------|-----------|---|-----------|-----------|-----------|
|      |           |           |           | H | 0.389863  | 1.323467  | -0.826756 | B | 1.824551  | -2.351835 | -1.188135 |
| C    | 2.604858  | 0.108347  | 0.103782  | C | -0.234642 | -0.632385 | -0.270462 | H | 1.073304  | -2.836210 | -1.962743 |
| C    | 1.199469  | -1.140344 | -0.204712 | C | -1.409345 | -1.491469 | -0.059535 | B | 2.300578  | -0.646105 | -1.434574 |
| C    | -3.764753 | -3.033686 | 0.409302  | C | -2.698528 | -0.857249 | 0.048292  | H | 1.878566  | 0.008253  | -2.320096 |
| H    | -4.654442 | -3.622944 | 0.611644  | C | -2.853449 | 0.546121  | -0.155441 | B | 3.288106  | -2.304469 | 1.295277  |
| C    | -3.868589 | -1.638388 | 0.317427  | C | 2.398394  | 1.588333  | 0.274262  | H | 3.576341  | -2.869678 | 2.297501  |
| C    | -5.139177 | -0.978751 | 0.457495  | C | 2.035912  | 2.133757  | 1.515260  | B | 3.134601  | -3.142243 | -0.277003 |
| H    | -6.006285 | -1.590904 | 0.689347  | H | 1.851568  | 1.485237  | 2.362285  | H | 3.325260  | -4.307117 | -0.401140 |
| C    | -5.269406 | 0.364829  | 0.291047  | C | 1.910686  | 3.513446  | 1.672278  | B | 3.511204  | -1.953124 | -1.555109 |
| H    | -6.239013 | 0.844329  | 0.390772  | H | 1.627687  | 3.916314  | 2.639493  | H | 3.983642  | -2.244767 | -2.603354 |
| C    | -4.132463 | 1.173398  | -0.046829 | C | 2.149223  | 4.370143  | 0.597050  | B | 3.943605  | -0.432214 | -0.764675 |
| C    | -4.237366 | 2.552243  | -0.295446 | H | 2.050951  | 5.443940  | 0.721766  | H | 4.638522  | 0.395802  | -1.242418 |
| H    | -5.209689 | 3.029761  | -0.212463 | C | 2.522668  | 3.837860  | -0.639138 | B | 3.815310  | -0.656442 | 0.995623  |
| C    | -3.119158 | 3.303134  | -0.655529 | H | 2.720958  | 4.494538  | -1.480227 | H | 4.403382  | 0.027233  | 1.760621  |
| H    | -3.223120 | 4.366589  | -0.847556 | C | 2.648710  | 2.459887  | -0.800207 | B | 4.436101  | -1.975106 | -0.028907 |
| C    | -1.869501 | 2.697451  | -0.770255 | H | 2.941364  | 2.062079  | -1.764781 | H | 5.582267  | -2.278993 | 0.020651  |
| H    | -0.997810 | 3.285126  | -1.043199 | B | 2.081866  | -0.984471 | 1.310994  | C | -1.389230 | -2.897674 | -0.035381 |
| C    | -1.721080 | 1.323362  | -0.517921 | H | 1.491075  | -0.591103 | 2.251445  | H | -0.474392 | -3.432705 | -0.223781 |
| C    | -0.441969 | 0.686039  | -0.573865 | B | 1.694338  | -2.552592 | 0.581450  | C | -2.539820 | -3.650596 | 0.197733  |
|      |           |           |           | H | 0.896634  | -3.208423 | 1.142536  | H | -2.466614 | -4.733669 | 0.210510  |

**Table S31** Cartesian coordinates of **4CB** at  $\Psi = 45^\circ$  in THF from B3LYP calculations (in Å).

| Atom | x         | y         | z         |   |           |           |           |   |           |           |           |
|------|-----------|-----------|-----------|---|-----------|-----------|-----------|---|-----------|-----------|-----------|
|      |           |           |           | H | 0.247784  | 1.365957  | -1.234016 | B | 2.013146  | -1.717737 | -1.832832 |
| C    | 2.561675  | 0.255083  | 0.102119  | C | -0.120979 | -0.547864 | -0.373932 | H | 1.243091  | -2.032263 | -2.673575 |
| C    | 1.357163  | -0.928401 | -0.432645 | C | -1.152401 | -1.382281 | 0.261644  | B | 2.328808  | 0.001233  | -1.579249 |
| C    | -3.262781 | -2.967046 | 1.355726  | C | -2.528797 | -0.974858 | 0.132494  | H | 1.823372  | 0.839530  | -2.228754 |
| H    | -4.062600 | -3.584723 | 1.753753  | C | -2.878065 | 0.269962  | -0.468809 | B | 3.613609  | -2.303027 | 0.484393  |
| C    | -3.580435 | -1.793773 | 0.656949  | C | 2.131190  | 1.564852  | 0.714546  | H | 4.030842  | -3.107300 | 1.249988  |
| C    | -4.947673 | -1.380768 | 0.486131  | C | 1.646824  | 1.642059  | 2.028417  | B | 3.457122  | -2.599927 | -1.274143 |
| H    | -5.726827 | -2.034907 | 0.867383  | H | 1.539368  | 0.745751  | 2.625355  | H | 3.754980  | -3.638380 | -1.765631 |
| C    | -5.269418 | -0.204188 | -0.115456 | C | 1.299834  | 2.872956  | 2.584494  | B | 3.640225  | -1.046527 | -2.109230 |
| H    | -6.307330 | 0.096542  | -0.226232 | H | 0.924823  | 2.910070  | 3.602342  | H | 4.070492  | -0.936907 | -3.209312 |
| C    | -4.241938 | 0.676998  | -0.592971 | C | 1.436615  | 4.046451  | 1.842794  | B | 3.950194  | 0.192068  | -0.886932 |
| C    | -4.528745 | 1.930940  | -1.157701 | H | 1.167601  | 5.003436  | 2.278862  | H | 4.521948  | 1.211040  | -1.063575 |
| H    | -5.565725 | 2.240604  | -1.252799 | C | 1.926063  | 3.981402  | 0.537390  | B | 3.927279  | -0.574182 | 0.713093  |
| C    | -3.505676 | 2.778235  | -1.581664 | H | 2.043606  | 4.886992  | -0.049281 | H | 4.481935  | -0.083809 | 1.635246  |
| H    | -3.749384 | 3.745589  | -2.009800 | C | 2.269943  | 2.752582  | -0.022604 | B | 4.641233  | -1.426081 | -0.676909 |
| C    | -2.173255 | 2.390036  | -1.460146 | H | 2.653695  | 2.721490  | -1.035627 | H | 5.814339  | -1.592194 | -0.745217 |
| H    | -1.377309 | 3.049379  | -1.793926 | B | 2.288886  | -1.228923 | 0.971218  | C | -0.903492 | -2.529685 | 1.035684  |
| C    | -1.845640 | 1.137733  | -0.913711 | H | 1.742554  | -1.209983 | 2.013511  | H | 0.105504  | -2.829869 | 1.255472  |
| C    | -0.490503 | 0.690309  | -0.831452 | B | 2.019906  | -2.502060 | -0.255870 | C | -1.933848 | -3.304712 | 1.567743  |
|      |           |           |           | H | 1.309570  | -3.413613 | -0.046755 | H | -1.682332 | -4.182745 | 2.154642  |



**Table S32** Cartesian coordinates of **4CB** at  $\Psi = 67.5^\circ$  in THF from B3LYP calculations (in Å).

| Atom | x         | y         | z         |   |           |           |           |   |           |           |           |
|------|-----------|-----------|-----------|---|-----------|-----------|-----------|---|-----------|-----------|-----------|
|      |           |           |           | H | 0.121373  | 1.151775  | -1.824747 | B | 2.226427  | -1.368879 | -2.033539 |
| C    | 2.544537  | 0.373422  | 0.181308  | C | -0.065872 | -0.548149 | -0.559916 | H | 1.537694  | -1.609855 | -2.964165 |
| C    | 1.434024  | -0.804781 | -0.614804 | C | -1.014179 | -1.364335 | 0.215738  | B | 2.421671  | 0.317651  | -1.531925 |
| C    | -2.965909 | -2.877346 | 1.657813  | C | -2.410401 | -1.003696 | 0.177199  | H | 1.940935  | 1.218976  | -2.109224 |
| H    | -3.704425 | -3.456146 | 2.204851  | C | -2.867832 | 0.121463  | -0.571233 | B | 3.706011  | -2.158796 | 0.305459  |
| C    | -3.379216 | -1.771706 | 0.902000  | C | 1.964331  | 1.559655  | 0.903784  | H | 4.118228  | -3.031604 | 0.995022  |
| C    | -4.766400 | -1.395509 | 0.847641  | C | 1.525826  | 1.460079  | 2.233265  | B | 3.678581  | -2.242691 | -1.480640 |
| H    | -5.477300 | -1.998622 | 1.405399  | H | 1.575784  | 0.513017  | 2.755002  | H | 4.071723  | -3.192133 | -2.074605 |
| C    | -5.188990 | -0.322329 | 0.127809  | C | 1.028893  | 2.577892  | 2.901716  | B | 3.822433  | -0.584792 | -2.102935 |
| H    | -6.240673 | -0.052064 | 0.099128  | H | 0.693578  | 2.478722  | 3.929234  | H | 4.314246  | -0.313610 | -3.147932 |
| C    | -4.251545 | 0.477391  | -0.607505 | C | 0.966854  | 3.814442  | 2.258335  | B | 3.986208  | 0.506247  | -0.717165 |
| C    | -4.647823 | 1.596404  | -1.358516 | H | 0.580062  | 4.683754  | 2.780951  | H | 4.499789  | 1.571045  | -0.738529 |
| H    | -5.700066 | 1.865300  | -1.385595 | C | 1.412402  | 3.927260  | 0.940843  | B | 3.914164  | -0.458081 | 0.766286  |
| C    | -3.714764 | 2.357607  | -2.061506 | H | 1.378506  | 4.885233  | 0.431698  | H | 4.379353  | -0.071868 | 1.782754  |
| H    | -4.043135 | 3.218506  | -2.635440 | C | 1.907189  | 2.811033  | 0.268867  | B | 4.754543  | -1.093997 | -0.666906 |
| C    | -2.364482 | 2.018118  | -2.031208 | H | 2.260278  | 2.920750  | -0.749363 | H | 5.937114  | -1.194172 | -0.676742 |
| H    | -1.637450 | 2.610375  | -2.579233 | B | 2.302370  | -1.206979 | 0.818839  | C | -0.671062 | -2.481449 | 0.999411  |
| C    | -1.928438 | 0.904914  | -1.292642 | H | 1.707336  | -1.332012 | 1.823470  | H | 0.351745  | -2.803196 | 1.076679  |
| C    | -0.550731 | 0.532850  | -1.250125 | B | 2.170088  | -2.342137 | -0.561188 | C | -1.622515 | -3.219189 | 1.702627  |
|      |           |           |           | H | 1.476388  | -3.292070 | -0.495564 | H | -1.296930 | -4.072081 | 2.290112  |

**Table S33** Cartesian coordinates of **4CB** at  $\Psi = 90^\circ$  in THF from B3LYP calculations (in Å).

| Atom | x         | y         | z         |   |           |           |           |   |           |           |           |
|------|-----------|-----------|-----------|---|-----------|-----------|-----------|---|-----------|-----------|-----------|
|      |           |           |           | H | 0.005267  | 0.413318  | -2.425557 | B | 2.247544  | -1.388299 | -2.018617 |
| C    | 2.532939  | 0.443799  | 0.149998  | C | -0.054432 | -0.645178 | -0.579499 | H | 1.561556  | -1.692891 | -2.932187 |
| C    | 1.451158  | -0.823062 | -0.626263 | C | -0.945214 | -1.225325 | 0.434952  | B | 2.361648  | 0.328177  | -1.560055 |
| C    | -2.774289 | -2.222237 | 2.387550  | C | -2.339742 | -0.863898 | 0.395126  | H | 1.804226  | 1.186900  | -2.135240 |
| H    | -3.461858 | -2.588070 | 3.144580  | C | -2.867047 | -0.058740 | -0.657930 | B | 3.805437  | -2.027178 | 0.312354  |
| C    | -3.242317 | -1.347478 | 1.396874  | C | 1.904669  | 1.614309  | 0.855522  | H | 4.271604  | -2.856597 | 1.020976  |
| C    | -4.624045 | -0.950226 | 1.353254  | C | 1.595492  | 1.549412  | 2.223619  | B | 3.744331  | -2.174213 | -1.465544 |
| H    | -5.281254 | -1.311512 | 2.139241  | H | 1.784765  | 0.641861  | 2.782688  | H | 4.172785  | -3.119203 | -2.042005 |
| C    | -5.109897 | -0.161682 | 0.357512  | C | 1.052723  | 2.651505  | 2.881953  | B | 3.794212  | -0.525488 | -2.144239 |
| H    | -6.158592 | 0.120548  | 0.334998  | H | 0.820745  | 2.579476  | 3.939826  | H | 4.252325  | -0.268048 | -3.207966 |
| C    | -4.250837 | 0.294512  | -0.698036 | C | 0.812510  | 3.838393  | 2.188630  | B | 3.939324  | 0.616113  | -0.796157 |
| C    | -4.727197 | 1.058594  | -1.776484 | H | 0.388815  | 4.695555  | 2.702687  | H | 4.399336  | 1.703262  | -0.869277 |
| H    | -5.779499 | 1.326929  | -1.806350 | C | 1.128277  | 3.918171  | 0.831848  | B | 3.950549  | -0.305397 | 0.713319  |
| C    | -3.875154 | 1.462356  | -2.803878 | H | 0.955853  | 4.838648  | 0.283098  | H | 4.416966  | 0.125761  | 1.711035  |
| H    | -4.266264 | 2.047492  | -3.630295 | C | 1.670813  | 2.817795  | 0.170575  | B | 4.782995  | -0.948050 | -0.719473 |
| C    | -2.525665 | 1.118955  | -2.774828 | H | 1.921649  | 2.904018  | -0.879297 | H | 5.968415  | -0.995771 | -0.754401 |
| H    | -1.861109 | 1.436702  | -3.573030 | B | 2.373629  | -1.115409 | 0.819603  | C | -0.558935 | -2.158543 | 1.413923  |
| C    | -2.007611 | 0.366152  | -1.707240 | H | 1.833637  | -1.221576 | 1.853301  | H | 0.444985  | -2.545362 | 1.433421  |
| C    | -0.619389 | 0.043708  | -1.623962 | B | 2.254344  | -2.312118 | -0.503506 | C | -1.451940 | -2.642501 | 2.369566  |
|      |           |           |           | H | 1.585295  | -3.275601 | -0.359884 | H | -1.098923 | -3.359293 | 3.104527  |

**Table S34** Cartesian coordinates of **4CB** at  $\Psi = 112.5^\circ$  in THF from B3LYP calculations (in Å).

| Atom | x         | y         | z         |   |           |           |           |   |           |           |           |
|------|-----------|-----------|-----------|---|-----------|-----------|-----------|---|-----------|-----------|-----------|
|      |           |           |           | H | 0.295120  | -2.377735 | 1.043041  | B | -1.815264 | -2.629421 | -0.300939 |
| C    | -2.592047 | 0.023185  | 0.247857  | C | 0.168829  | -0.662633 | -0.213405 | H | -0.988510 | -3.454586 | -0.141871 |
| C    | -1.316703 | -0.977043 | -0.432240 | C | 0.945343  | 0.433294  | -0.810464 | B | -2.176481 | -1.467319 | 0.998854  |
| C    | 2.578030  | 2.470019  | -1.978719 | C | 2.381455  | 0.407996  | -0.666486 | H | -1.597231 | -1.461066 | 2.021932  |
| H    | 3.195255  | 3.237090  | -2.437254 | C | 3.035180  | -0.601109 | 0.099936  | B | -3.627798 | -1.244264 | -2.015441 |
| C    | 3.189292  | 1.424082  | -1.273230 | C | -2.228833 | 1.329703  | 0.909702  | H | -4.111373 | -1.107079 | -3.090004 |
| C    | 4.619745  | 1.368841  | -1.132915 | C | -2.596418 | 2.540890  | 0.300742  | B | -3.269946 | -2.819782 | -1.279840 |
| H    | 5.206793  | 2.143506  | -1.618261 | H | -3.121177 | 2.534697  | -0.647316 | H | -3.485341 | -3.850139 | -1.828186 |
| C    | 5.231025  | 0.392306  | -0.410664 | C | -2.299212 | 3.760068  | 0.906271  | B | -3.398233 | -2.638303 | 0.491575  |
| H    | 6.312319  | 0.370215  | -0.309815 | H | -2.595565 | 4.683913  | 0.419656  | H | -3.700544 | -3.524349 | 1.220340  |
| C    | 4.456543  | -0.621837 | 0.245461  | C | -1.625129 | 3.792349  | 2.127907  | B | -3.870192 | -0.967170 | 0.837792  |
| C    | 5.045426  | -1.624839 | 1.033347  | H | -1.391922 | 4.742199  | 2.598845  | H | -4.431472 | -0.581776 | 1.804890  |
| H    | 6.126073  | -1.639606 | 1.144026  | C | -1.255180 | 2.595031  | 2.740030  | B | -4.007670 | -0.111867 | -0.703114 |
| C    | 4.265412  | -2.587777 | 1.672735  | H | -0.732278 | 2.605921  | 3.691118  | H | -4.682421 | 0.851954  | -0.810916 |
| H    | 4.741519  | -3.352226 | 2.278768  | C | -1.556260 | 1.372506  | 2.139654  | B | -4.541467 | -1.795869 | -0.585100 |
| C    | 2.879398  | -2.574614 | 1.536203  | H | -1.265250 | 0.456635  | 2.637005  | H | -5.696107 | -2.065436 | -0.636884 |
| H    | 2.272092  | -3.327773 | 2.029772  | B | -2.404292 | -0.104377 | -1.468368 | C | 0.400827  | 1.539834  | -1.482815 |
| C    | 2.253188  | -1.590940 | 0.751750  | H | -2.067597 | 0.819934  | -2.099546 | H | -0.663763 | 1.661281  | -1.545473 |
| C    | 0.839065  | -1.578771 | 0.559897  | B | -1.937227 | -1.768710 | -1.838490 | C | 1.194898  | 2.531490  | -2.057315 |
|      |           |           |           | H | -1.173211 | -1.962717 | -2.720227 | H | 0.714199  | 3.360365  | -2.567721 |

**Table S35** Cartesian coordinates of **4CB** at  $\Psi = 135^\circ$  in THF from B3LYP calculations (in Å).

| Atom | x         | y         | z         |   |           |           |           |   |           |           |           |
|------|-----------|-----------|-----------|---|-----------|-----------|-----------|---|-----------|-----------|-----------|
|      |           |           |           | H | 0.513378  | -2.602311 | 0.877971  | B | -1.790956 | -2.728959 | 0.079854  |
| C    | -2.570764 | -0.027321 | 0.163160  | C | 0.217659  | -0.732320 | -0.088165 | H | -1.016856 | -3.543259 | 0.430720  |
| C    | -1.266810 | -1.104780 | -0.253874 | C | 0.905505  | 0.459979  | -0.611552 | B | -2.223129 | -1.394703 | 1.165529  |
| C    | 2.370417  | 2.710058  | -1.607585 | C | 2.346781  | 0.508870  | -0.524499 | H | -1.715378 | -1.235466 | 2.214972  |
| H    | 2.922919  | 3.562450  | -1.992043 | C | 3.096166  | -0.548154 | 0.071367  | B | -3.449587 | -1.616596 | -1.960513 |
| C    | 3.067838  | 1.638474  | -1.033930 | C | -2.293058 | 1.353471  | 0.716659  | H | -3.852322 | -1.642399 | -3.076043 |
| C    | 4.503177  | 1.664180  | -0.943534 | C | -2.865630 | 2.477987  | 0.100355  | B | -3.164190 | -3.063316 | -0.973878 |
| H    | 5.019797  | 2.531823  | -1.344242 | H | -3.477860 | 2.360955  | -0.785003 | H | -3.344097 | -4.164740 | -1.377717 |
| C    | 5.203811  | 0.647335  | -0.375005 | C | -2.650641 | 3.755995  | 0.613136  | B | -3.423732 | -2.623607 | 0.738175  |
| H    | 6.287610  | 0.685359  | -0.313467 | H | -3.105523 | 4.610193  | 0.121578  | H | -3.789298 | -3.393526 | 1.563338  |
| C    | 4.521829  | -0.496266 | 0.159027  | C | -1.856505 | 3.936072  | 1.746258  | B | -3.898236 | -0.921927 | 0.795497  |
| C    | 5.205964  | -1.562016 | 0.766756  | H | -1.688155 | 4.931786  | 2.144386  | H | -4.529172 | -0.393221 | 1.644524  |
| H    | 6.289498  | -1.520872 | 0.833890  | C | -1.279992 | 2.825487  | 2.362045  | B | -3.911593 | -0.305506 | -0.864960 |
| C    | 4.516165  | -2.659557 | 1.280620  | H | -0.657337 | 2.949846  | 3.242342  | H | -4.582615 | 0.616933  | -1.167550 |
| H    | 5.065060  | -3.471901 | 1.746670  | C | -1.497701 | 1.544448  | 1.855661  | B | -4.472290 | -1.950233 | -0.534192 |
| C    | 3.127267  | -2.718852 | 1.197539  | H | -1.034930 | 0.700504  | 2.349967  | H | -5.622989 | -2.224087 | -0.630427 |
| H    | 2.589496  | -3.574969 | 1.594451  | B | -2.255820 | -0.403156 | -1.504227 | C | 0.275362  | 1.582222  | -1.175815 |
| C    | 2.407463  | -1.672143 | 0.596342  | H | -1.820315 | 0.411611  | -2.224937 | H | -0.794751 | 1.635068  | -1.228138 |
| C    | 0.986085  | -1.717796 | 0.478777  | B | -1.785603 | -2.106270 | -1.574143 | C | 0.985575  | 2.677399  | -1.664248 |
|      |           |           |           | H | -0.952668 | -2.427367 | -2.349620 | H | 0.436400  | 3.512319  | -2.088299 |

**Table S36** Cartesian coordinates of **4CB** at  $\Psi = 157.5^\circ$  in THF from B3LYP calculations (in Å).

| Atom | x         | y         | z         |   |           |           |           |  |   |           |           |           |
|------|-----------|-----------|-----------|---|-----------|-----------|-----------|--|---|-----------|-----------|-----------|
|      |           |           |           | H | 0.795630  | -2.870038 | 0.271832  |  | B | -1.630974 | -2.767256 | 0.466822  |
| C    | -2.544431 | -0.115413 | 0.123689  | C | 0.325752  | -0.836051 | -0.147759 |  | H | -0.825089 | -3.457407 | 0.977462  |
| C    | -1.164921 | -1.226862 | -0.155053 | C | 0.918674  | 0.461327  | -0.499310 |  | B | -2.098570 | -1.285033 | 1.312435  |
| C    | 2.179070  | 2.964485  | -1.064537 | C | 2.340694  | 0.632757  | -0.325223 |  | H | -1.580960 | -0.948472 | 2.314180  |
| H    | 2.649222  | 3.924079  | -1.259223 | C | 3.178591  | -0.455793 | 0.053807  |  | B | -3.356373 | -2.068757 | -1.705541 |
| C    | 2.955109  | 1.901491  | -0.581653 | C | -2.409248 | 1.352804  | 0.466142  |  | H | -3.768319 | -2.294793 | -2.794761 |
| C    | 4.369302  | 2.056473  | -0.368510 | C | -2.968073 | 2.316564  | -0.390112 |  | B | -2.999449 | -3.328828 | -0.500610 |
| H    | 4.803929  | 3.036742  | -0.543271 | H | -3.435857 | 2.013899  | -1.318867 |  | H | -3.137932 | -4.487186 | -0.718818 |
| C    | 5.153017  | 1.015769  | 0.021847  | C | -2.920624 | 3.670351  | -0.064591 |  | B | -3.258239 | -2.622567 | 1.120591  |
| H    | 6.221111  | 1.149516  | 0.167522  | H | -3.360530 | 4.396498  | -0.740893 |  | H | -3.578224 | -3.261957 | 2.067069  |
| C    | 4.587353  | -0.287750 | 0.222874  | C | -2.313453 | 4.088746  | 1.120640  |  | B | -3.806596 | -0.962681 | 0.909421  |
| C    | 5.369728  | -1.405527 | 0.557139  | H | -2.276723 | 5.143520  | 1.374370  |  | H | -4.450166 | -0.335084 | 1.677414  |
| H    | 6.440994  | -1.278817 | 0.686249  | C | -1.755460 | 3.139345  | 1.976202  |  | B | -3.867166 | -0.624180 | -0.830959 |
| C    | 4.792218  | -2.665618 | 0.710233  | H | -1.279212 | 3.449283  | 2.900972  |  | H | -4.580840 | 0.208166  | -1.267090 |
| H    | 5.416100  | -3.517434 | 0.962600  | C | -1.805064 | 1.782976  | 1.655710  |  | B | -4.348533 | -2.216377 | -0.226866 |
| C    | 3.420118  | -2.837989 | 0.541680  | H | -1.363134 | 1.067698  | 2.336415  |  | H | -5.487770 | -2.547574 | -0.254595 |
| H    | 2.971449  | -3.819362 | 0.665621  | B | -2.203953 | -0.739800 | -1.459562 |  | C | 0.220518  | 1.546100  | -1.051741 |
| C    | 2.601502  | -1.741441 | 0.221762  | H | -1.783969 | -0.023234 | -2.292654 |  | H | -0.819873 | 1.449570  | -1.294108 |
| C    | 1.184535  | -1.878335 | 0.098557  | B | -1.675670 | -2.428482 | -1.273558 |  | C | 0.830674  | 2.769130  | -1.325237 |
|      |           |           |           | H | -0.848374 | -2.835345 | -2.013480 |  | H | 0.232666  | 3.572315  | -1.744148 |

**Table S37** Cartesian coordinates of **4CB** at  $\Psi = 180^\circ$  in THF from B3LYP calculations (in Å).

| Atom | x         | y         | z         |   |           |           |           |   |           |           |           |
|------|-----------|-----------|-----------|---|-----------|-----------|-----------|---|-----------|-----------|-----------|
|      |           |           |           | H | 1.342270  | -2.814329 | -0.010662 | B | -1.107337 | -2.699435 | 0.897823  |
| C    | -2.769478 | -0.358912 | 0.002366  | C | 0.627220  | -0.804501 | -0.007427 | H | -0.234338 | -3.070074 | 1.602190  |
| C    | -0.802983 | -1.352305 | -0.002709 | C | 1.036836  | 0.594285  | -0.008597 | B | -1.925368 | -1.148712 | 1.313759  |
| C    | 1.918803  | 3.303228  | -0.005241 | C | 2.441331  | 0.909354  | -0.001895 | H | -1.586776 | -0.510289 | 2.248045  |
| H    | 2.250937  | 4.337489  | -0.002892 | C | 3.426906  | -0.118412 | -0.000091 | B | -2.786653 | -2.772692 | -1.428097 |
| C    | 2.872769  | 2.274326  | 0.000937  | C | -3.033221 | 1.105077  | 0.002938  | H | -3.047923 | -3.272424 | -2.471714 |
| C    | 4.281676  | 2.564056  | 0.008645  | C | -3.218082 | 1.795811  | -1.208495 | B | -2.283450 | -3.709666 | 0.003143  |
| H    | 4.586412  | 3.606865  | 0.011723  | H | -3.096364 | 1.275040  | -2.151119 | H | -2.161249 | -4.890598 | 0.003513  |
| C    | 5.215255  | 1.574238  | 0.011268  | C | -3.557607 | 3.146061  | -1.205070 | B | -2.777463 | -2.770905 | 1.436458  |
| H    | 6.275007  | 1.813202  | 0.016616  | H | -3.698831 | 3.665656  | -2.147284 | H | -3.032152 | -3.269184 | 2.482390  |
| C    | 4.821117  | 0.193726  | 0.006023  | C | -3.717713 | 3.827287  | 0.004290  | B | -3.683506 | -1.362753 | 0.911233  |
| C    | 5.752373  | -0.857718 | 0.005875  | H | -3.981116 | 4.880354  | 0.004821  | H | -4.497864 | -0.845199 | 1.595013  |
| H    | 6.813135  | -0.623142 | 0.010426  | C | -3.540011 | 3.149192  | 1.212954  | B | -3.689505 | -1.364116 | -0.898977 |
| C    | 5.331089  | -2.187270 | -0.000417 | H | -3.667444 | 3.671298  | 2.155746  | H | -4.508618 | -0.847886 | -1.578034 |
| H    | 6.067090  | -2.985368 | -0.000580 | C | -3.200554 | 1.798917  | 1.215049  | B | -3.834204 | -2.906445 | 0.007749  |
| C    | 3.973108  | -2.499026 | -0.006400 | H | -3.065381 | 1.280619  | 2.157170  | H | -4.872683 | -3.481561 | 0.011490  |
| H    | 3.648822  | -3.535701 | -0.010987 | B | -1.934193 | -1.150570 | -1.313244 | C | 0.138089  | 1.667538  | -0.018431 |
| C    | 3.009187  | -1.476211 | -0.006148 | H | -1.601707 | -0.512783 | -2.250205 | H | -0.917463 | 1.474739  | -0.030938 |
| C    | 1.608920  | -1.766085 | -0.009567 | B | -1.112975 | -2.700278 | -0.900098 | C | 0.565026  | 2.994844  | -0.016481 |
|      |           |           |           | H | -0.244402 | -3.071498 | -1.609628 | H | -0.176420 | 3.787624  | -0.024103 |
